# Supplementary material for: Targeted metabolomics to assess positive effects of empagliflozin in a Parkinson's disease model – focused on the kynurenine pathway and oxidative stress
Source: Research Square preprint supplement (doi:10.21203/rs.3.rs-8658213/v1), 2026-02-07
Supplement: Supplementary file 2 [file 80ada6017b824d8a0e9bafe9.docx]

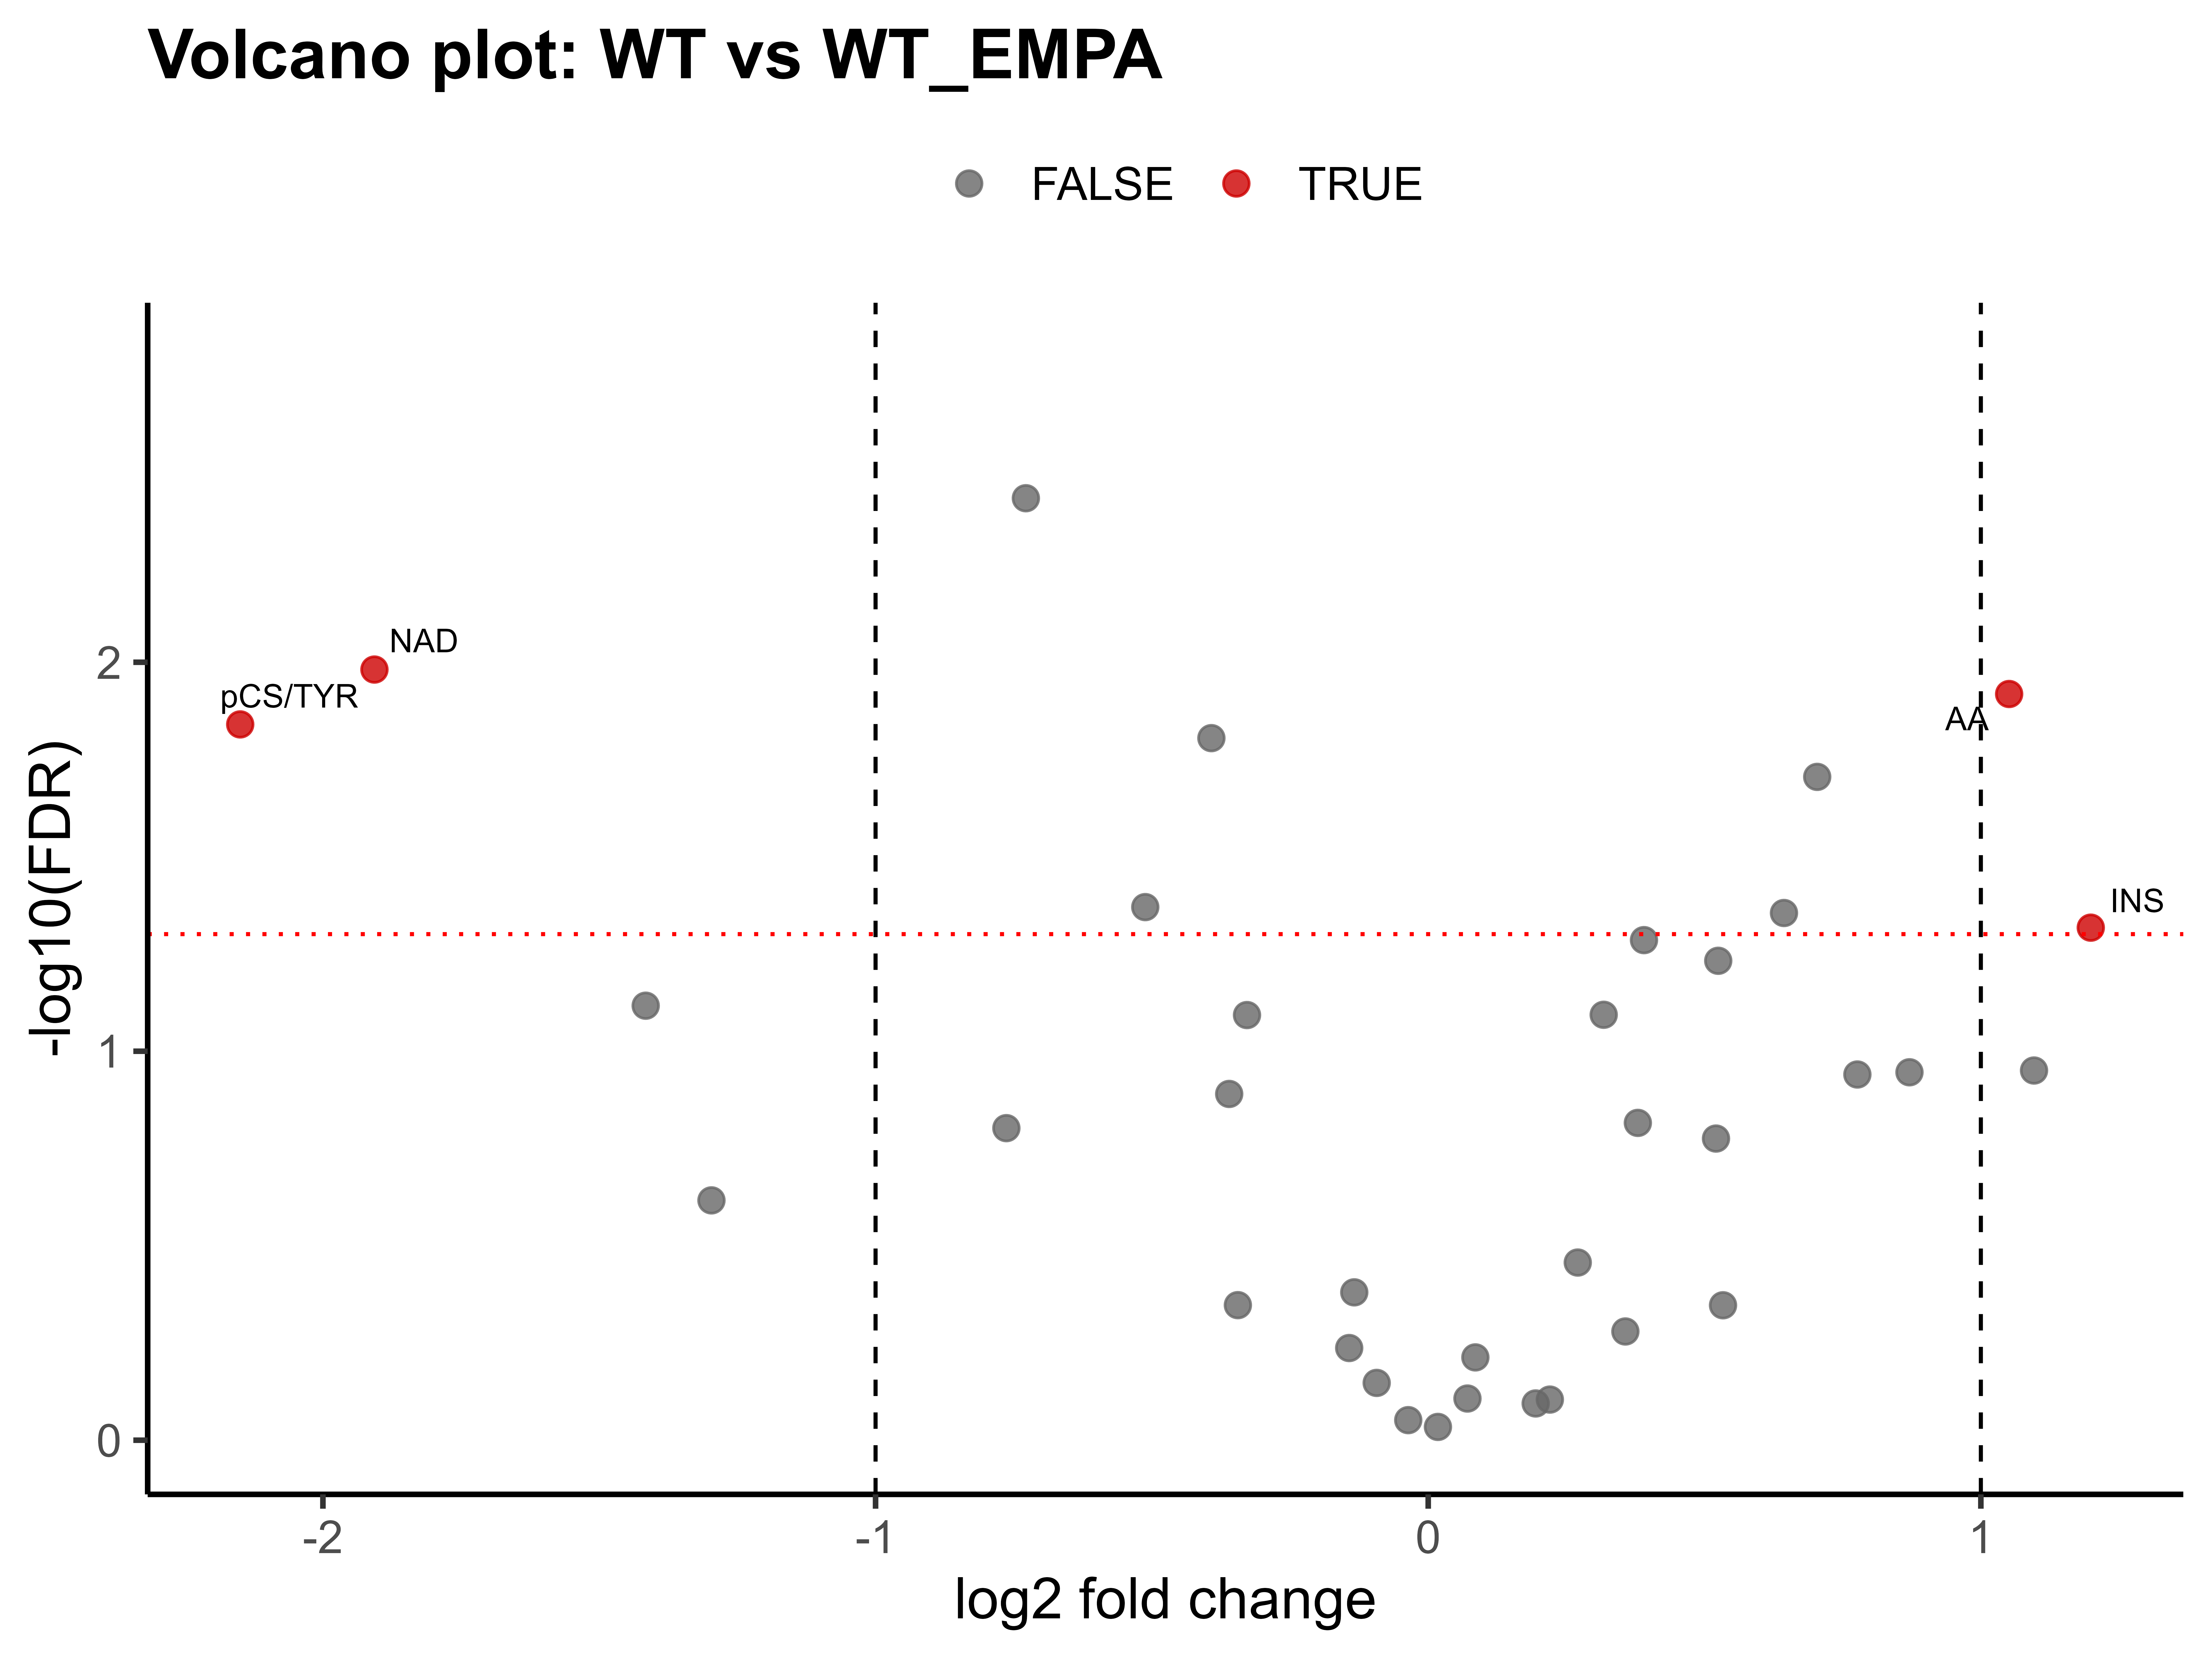


Volcano plot of the comparison of WT and WT_EMPA groups. The figure shows the fold changes in the quantified metabolites between the groups. FALSE (grey dot): not significantly changed; TRUE (red dot): significantly changed


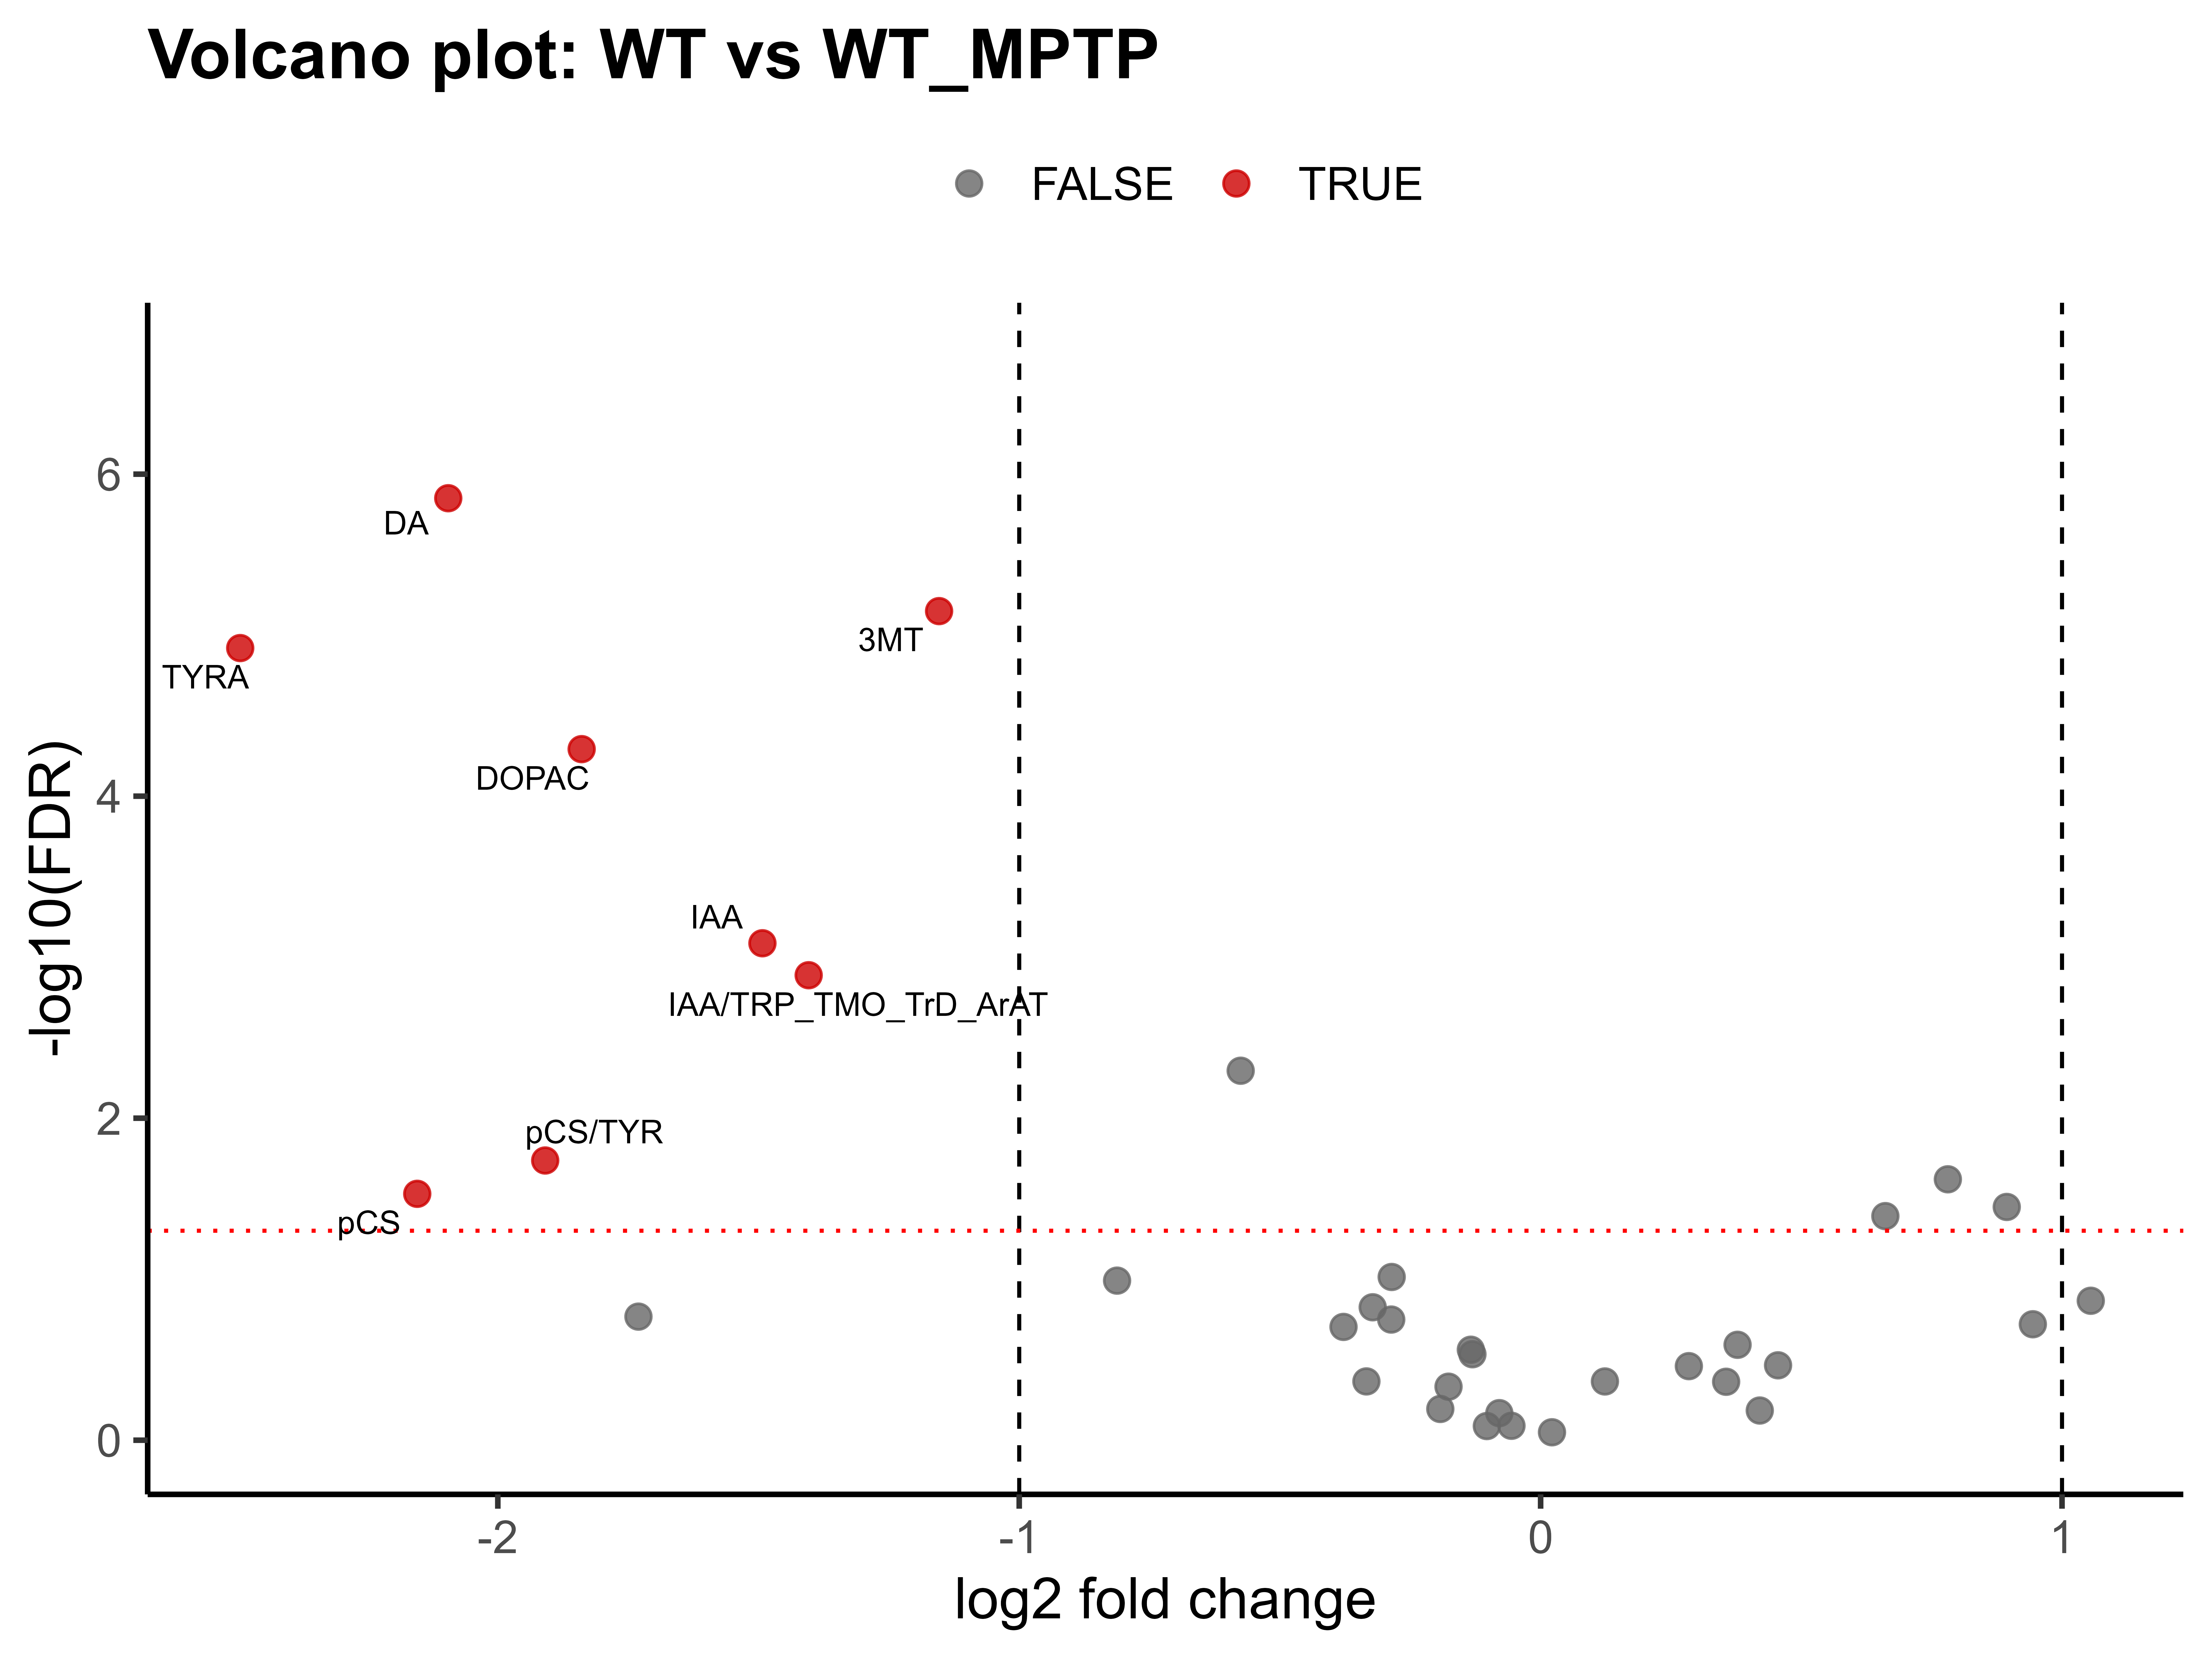


Volcano plot of the comparison of WT and WT_MPTP groups. The figure shows the fold changes in the quantified metabolites between the groups. FALSE (grey dot): not significantly changed; TRUE (red dot): significantly changed


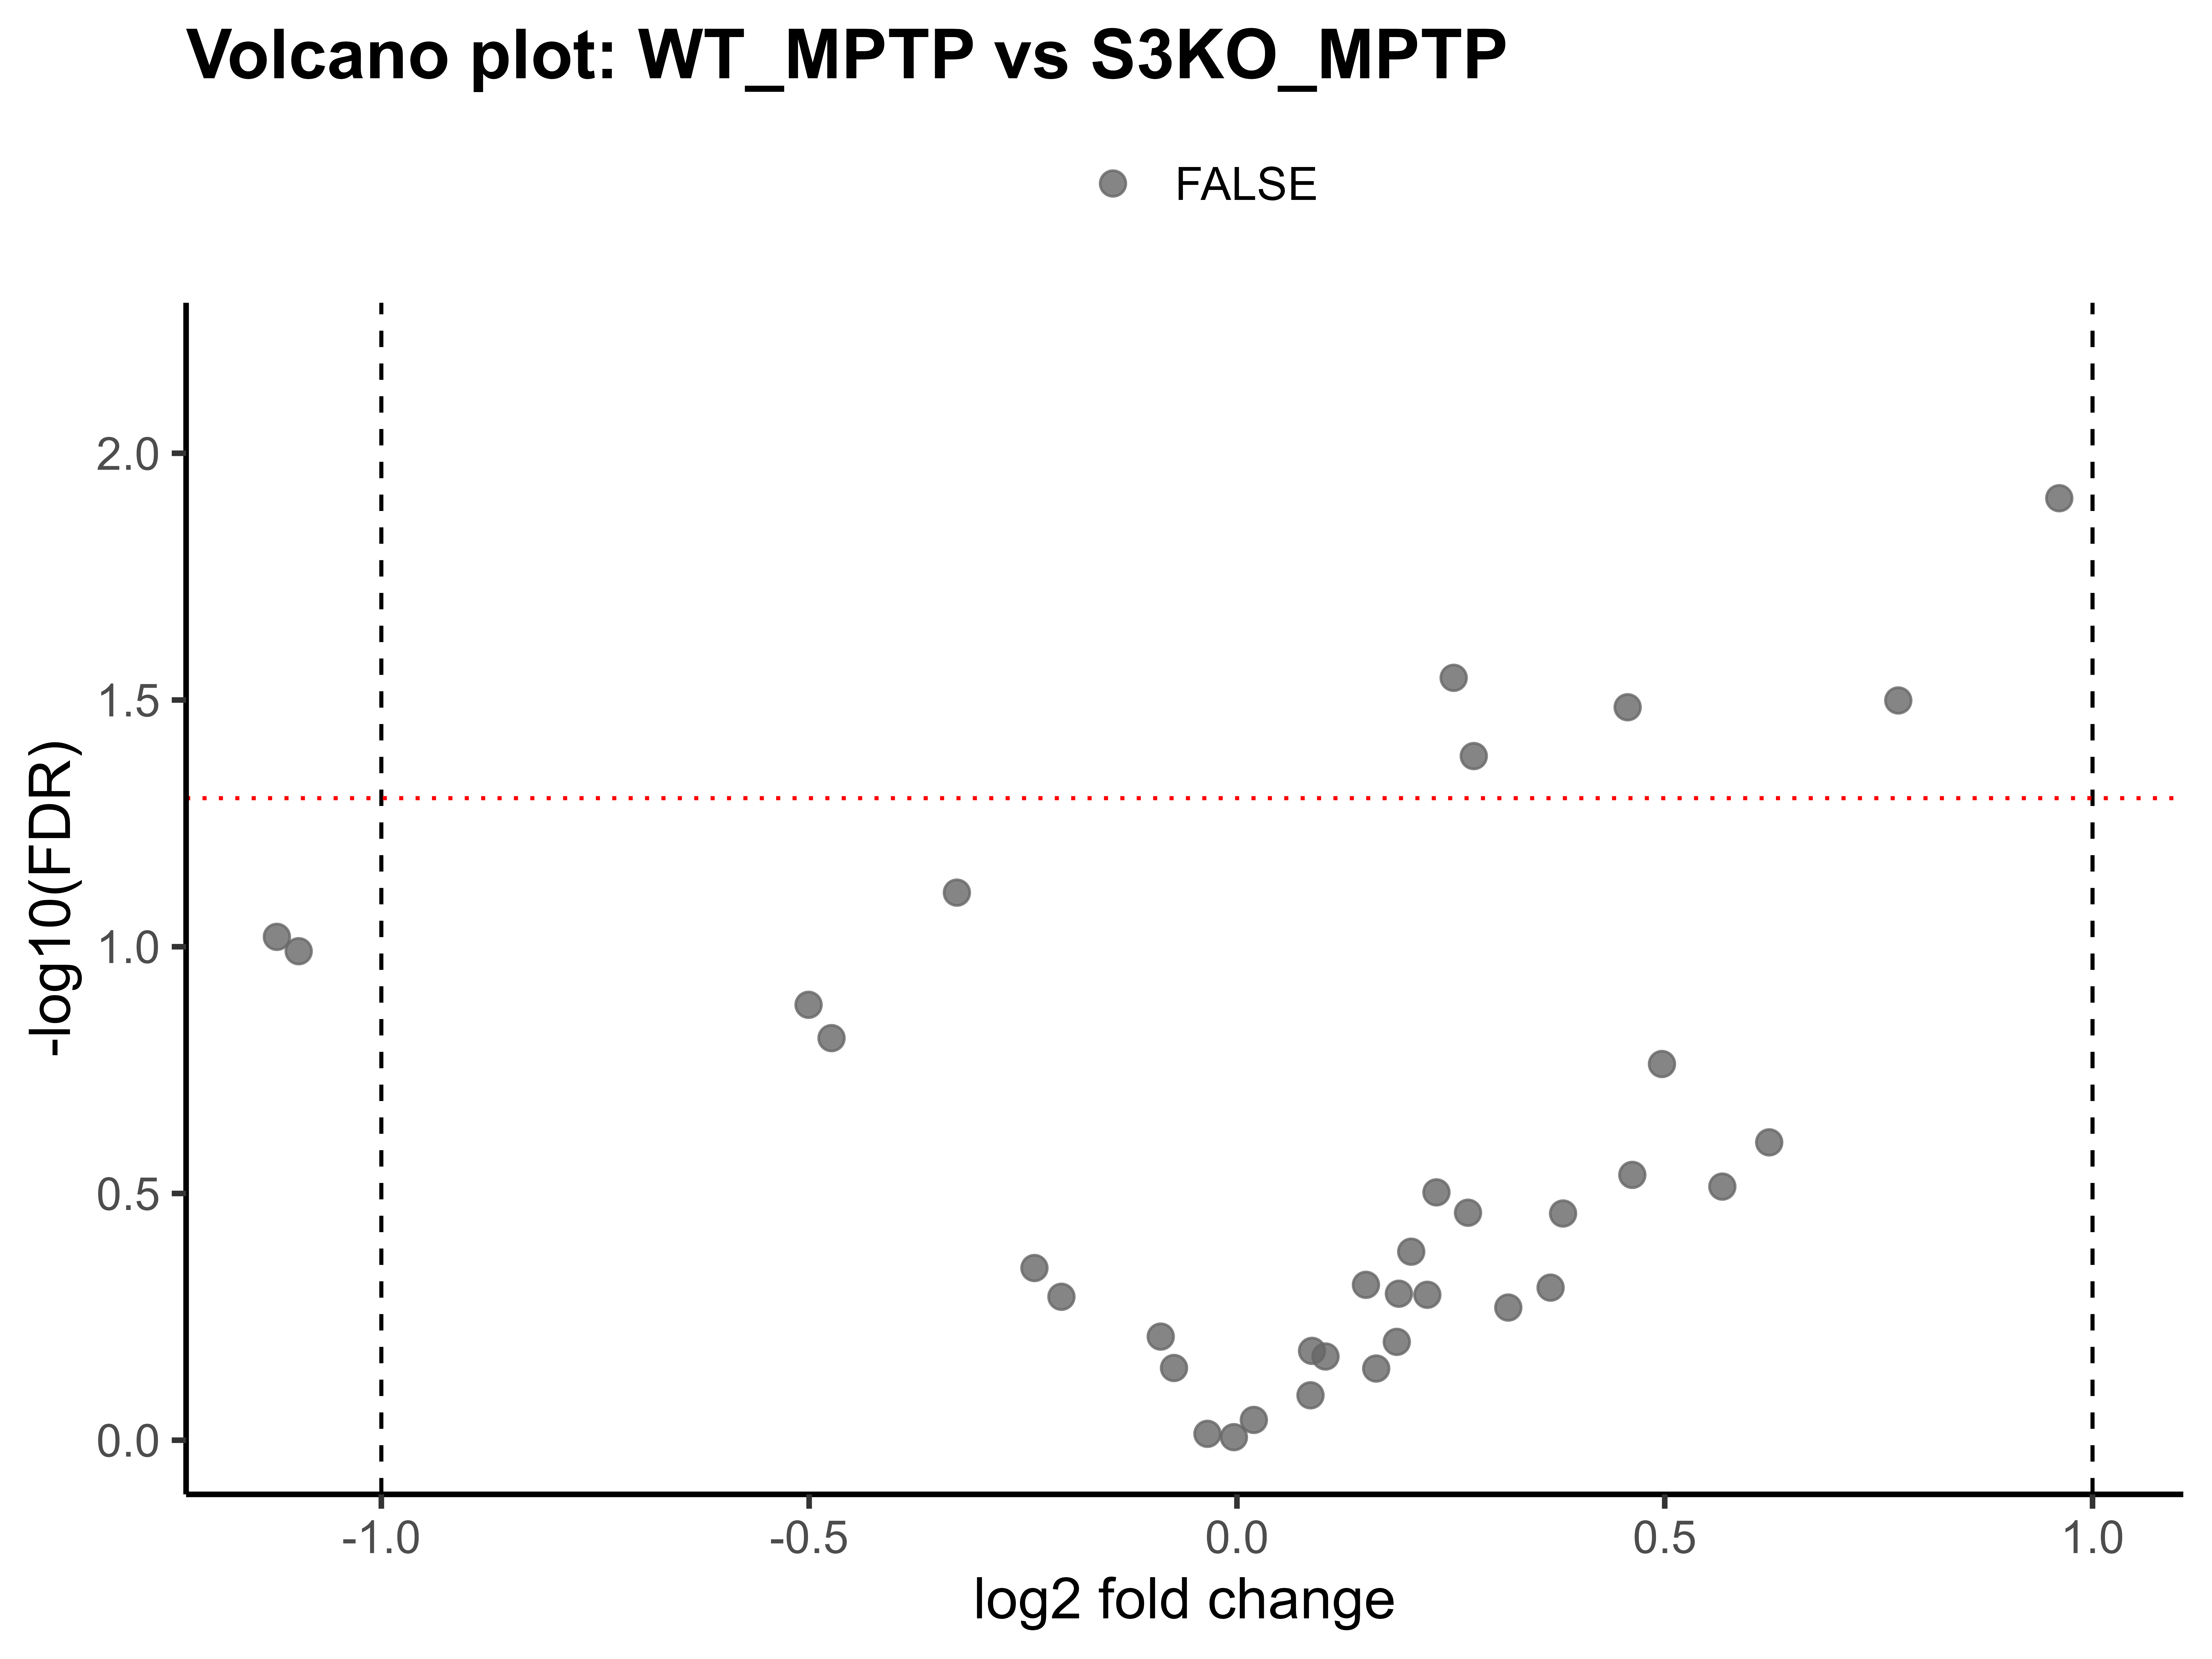


Volcano plot of the comparison of WT_MPTP and S3KO_MPTP groups. The figure shows the fold changes in the quantified metabolites between the groups. FALSE (grey dot): not significantly changed; TRUE (red dot): significantly changed
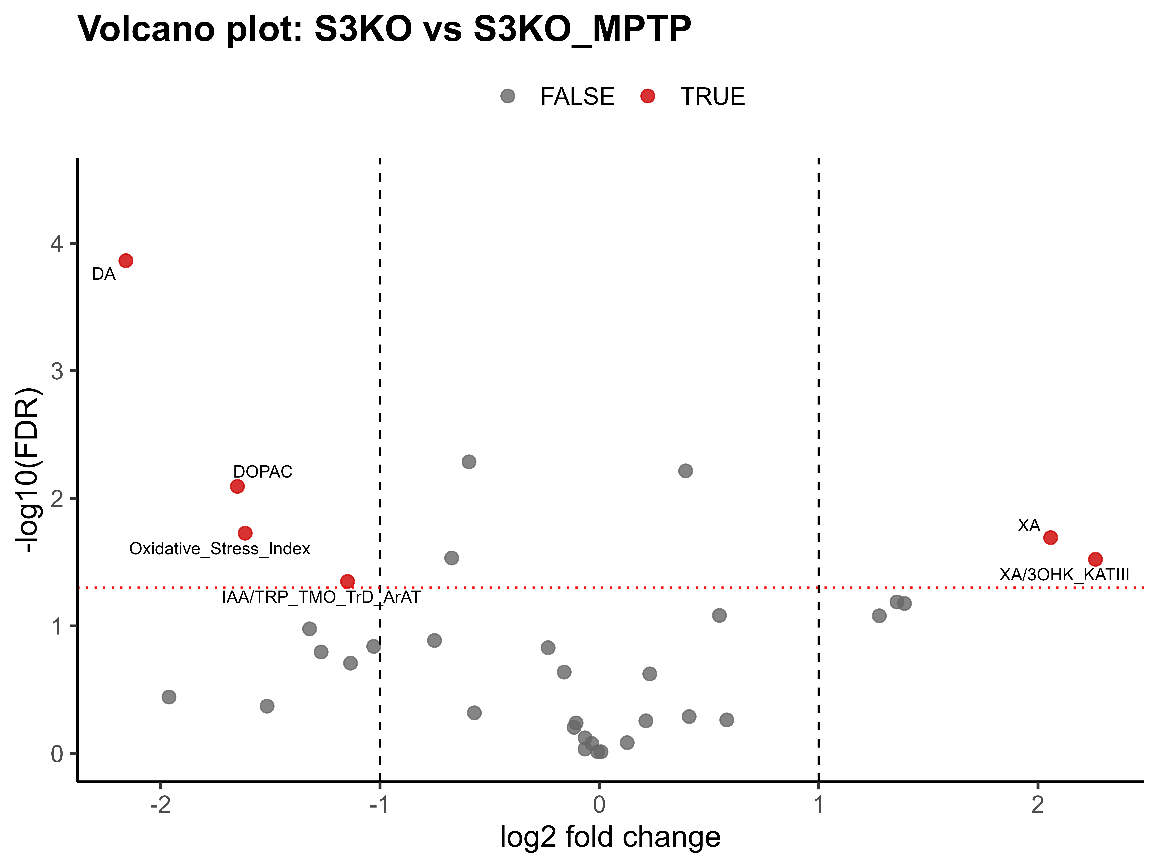


Volcano plot of the comparison of S3KO and S3KO_MPTP groups. The figure shows the fold changes in the quantified metabolites between the groups. FALSE (grey dot): not significantly changed; TRUE (red dot): significantly changed


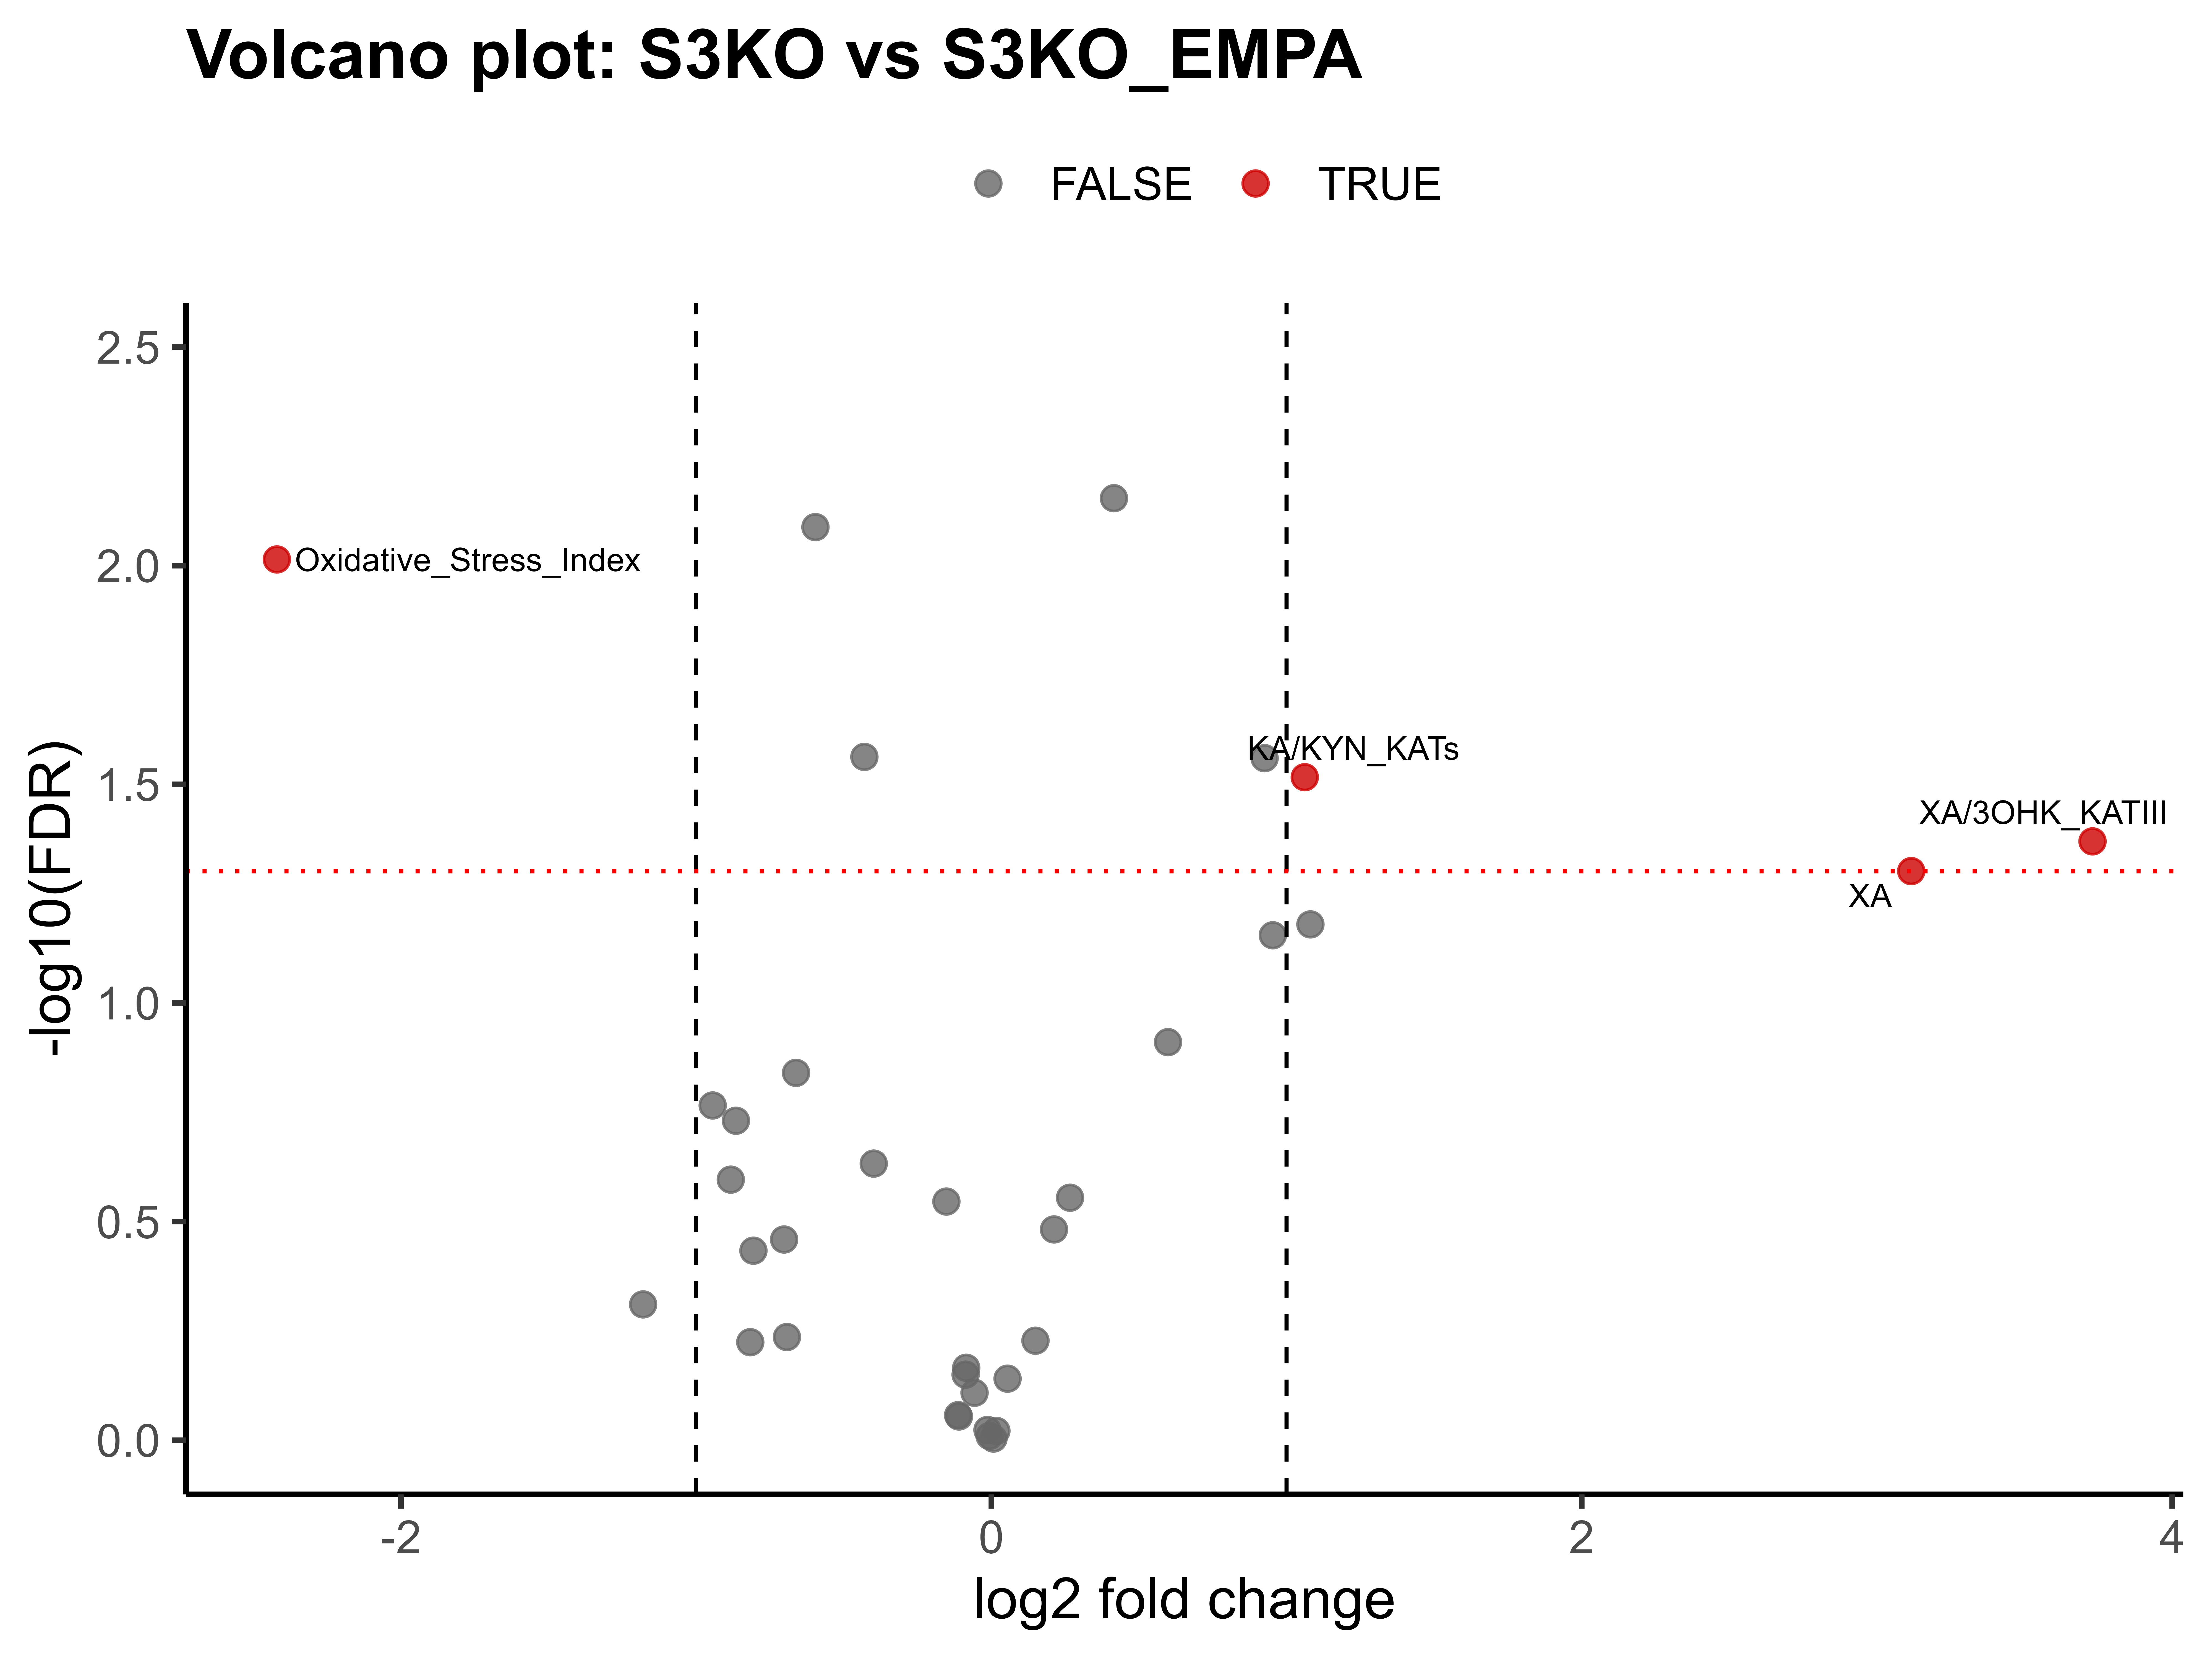


Volcano plot of the comparison of S3KO and S3KO_EMPA groups. The figure shows the fold changes in the quantified metabolites between the groups. FALSE (grey dot): not significantly changed; TRUE (red dot): significantly changed
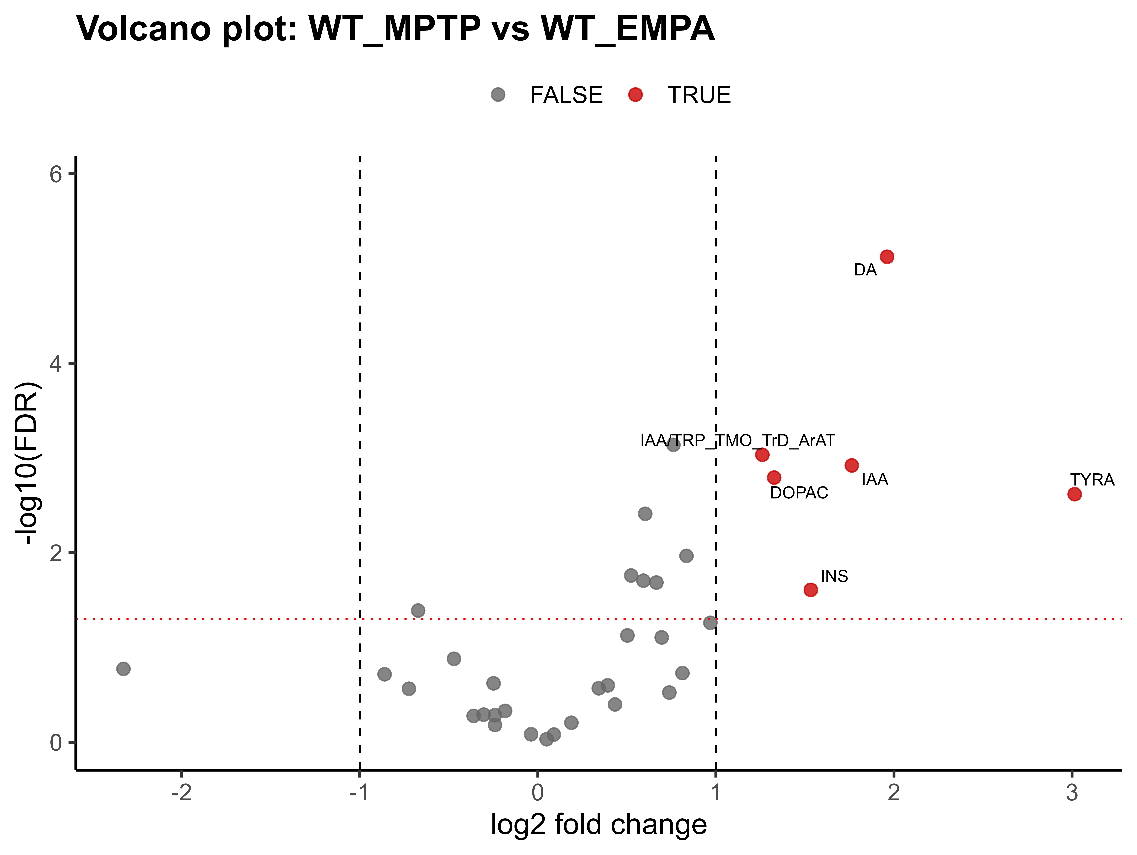


Volcano plot of the comparison of WT_MPTP and WT_EMPA groups. The figure shows the fold changes in the quantified metabolites between the groups. FALSE (grey dot): not significantly changed; TRUE (red dot): significantly changed


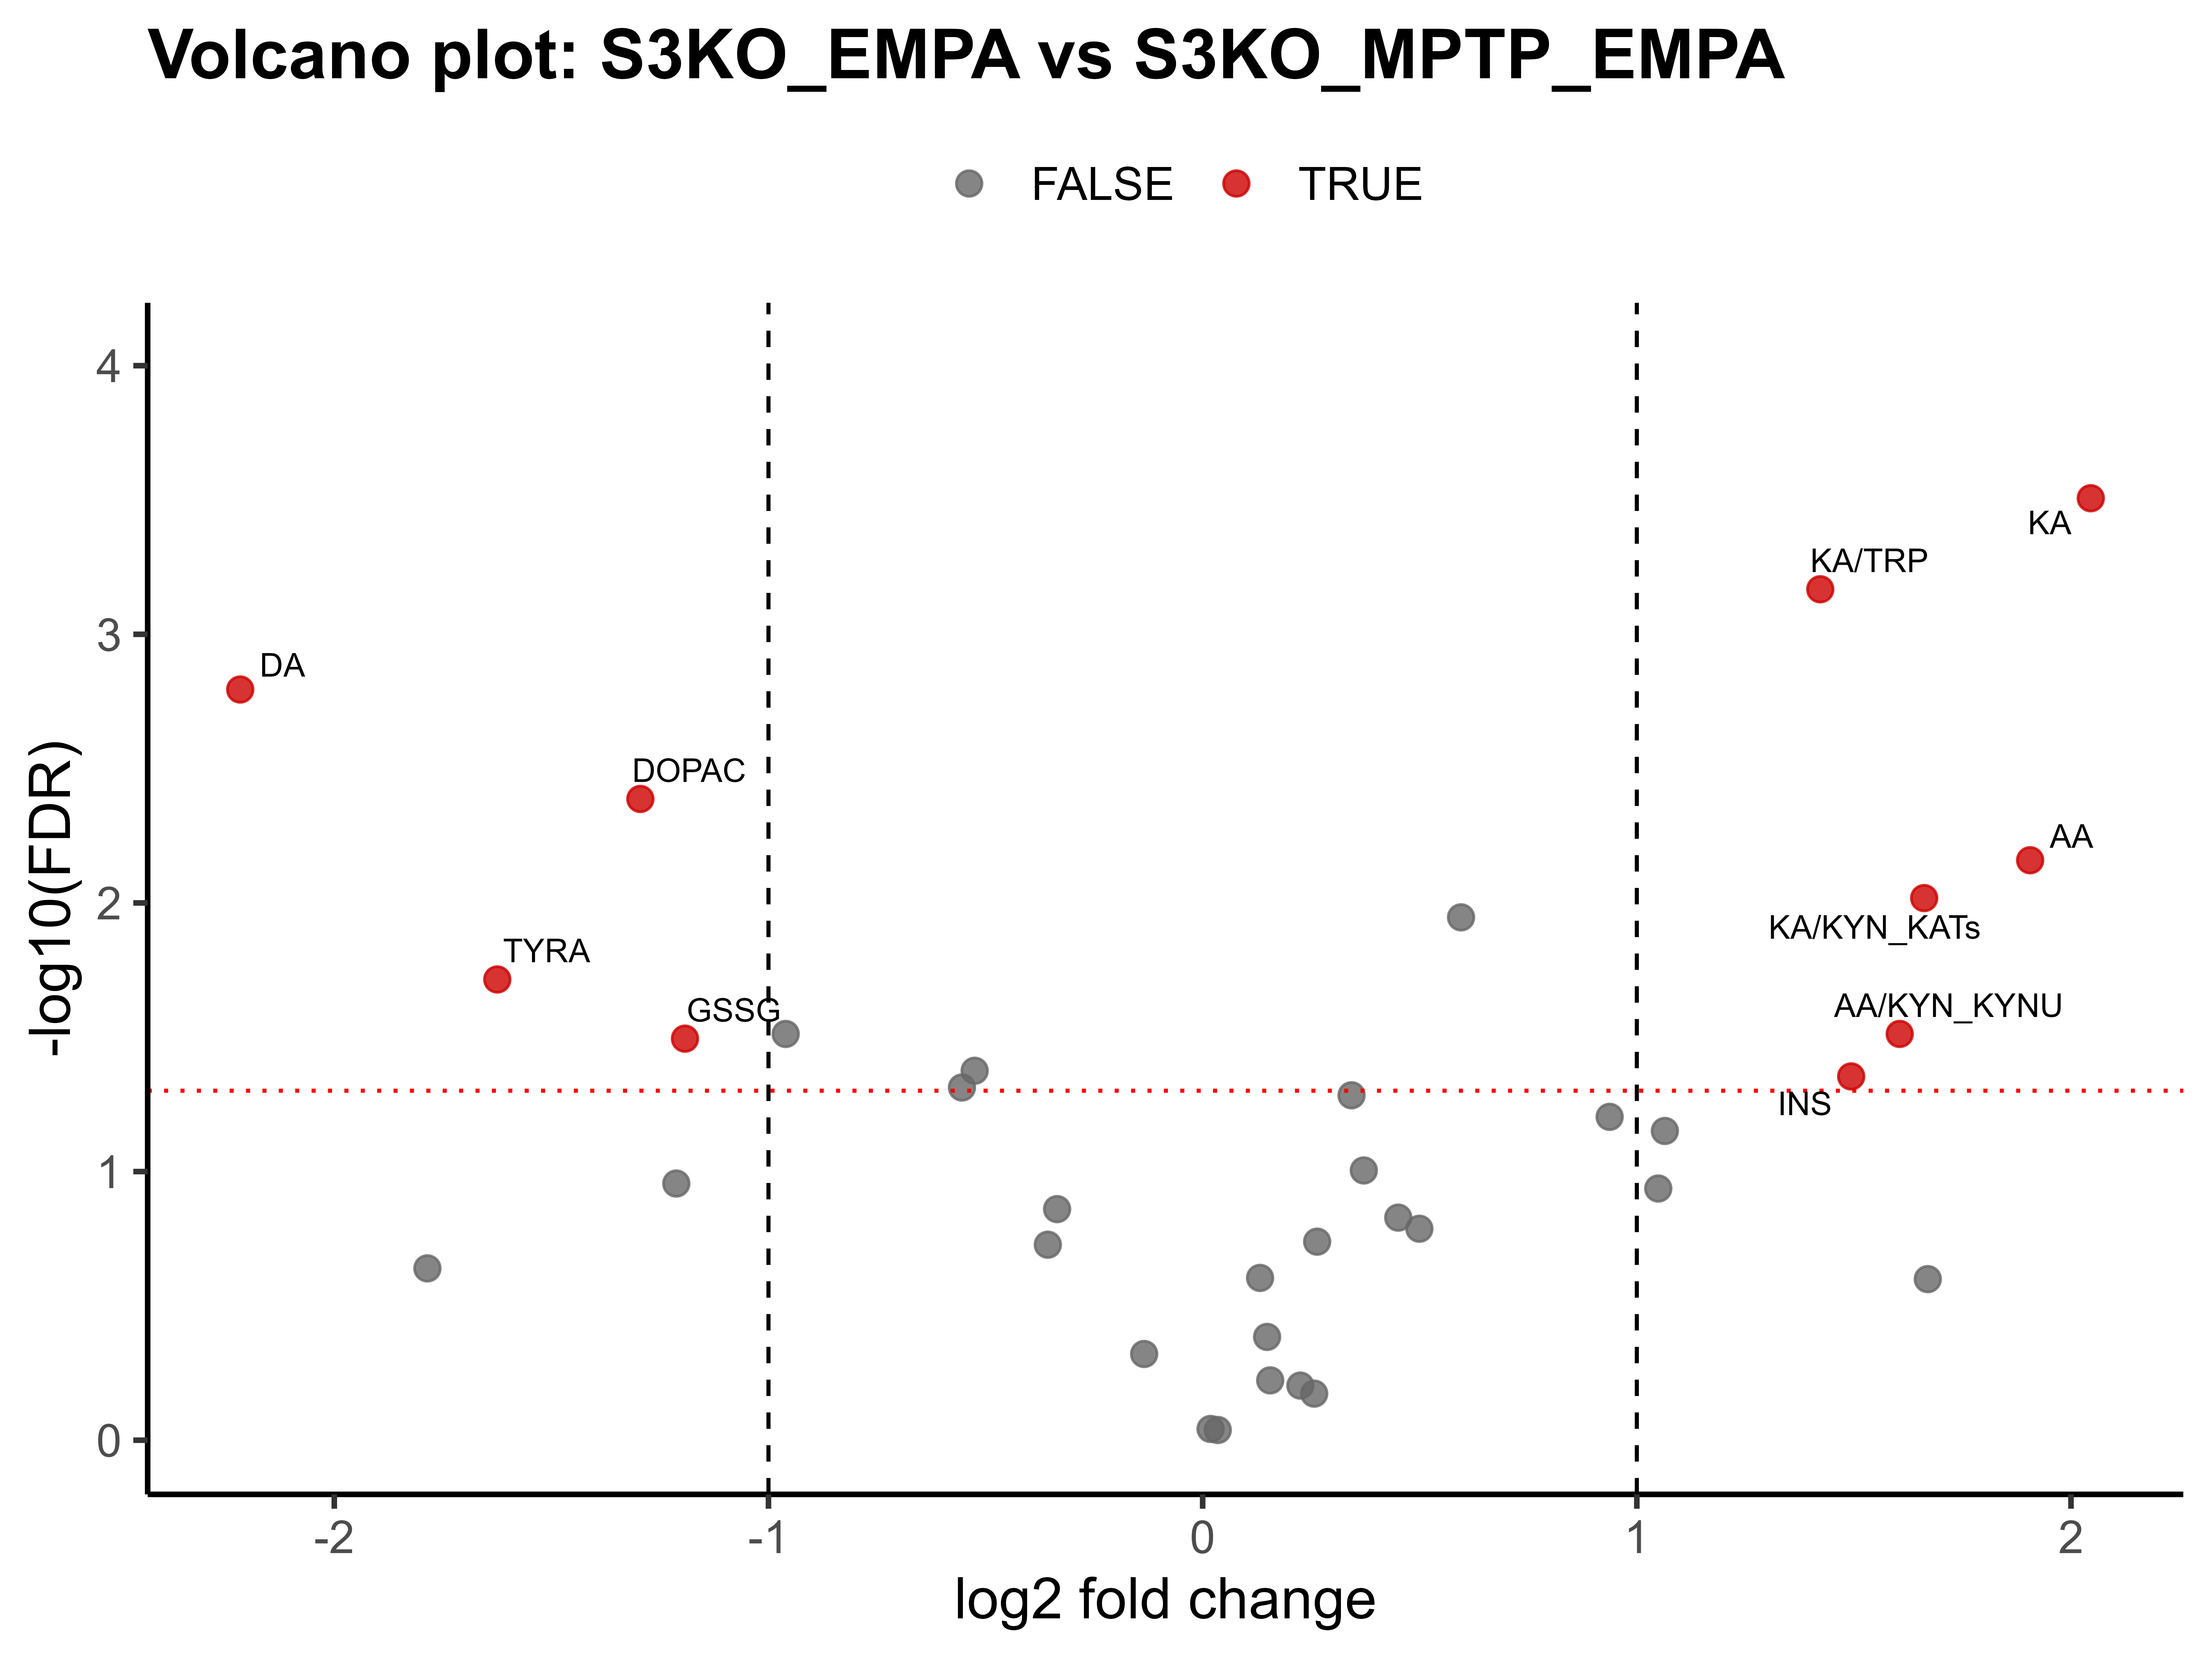


Volcano plot of the comparison of S3KO_EMPA and S3KO_MPTP_EMPA groups. The figure shows the fold changes in the quantified metabolites between the groups. FALSE (grey dot): not significantly changed; TRUE (red dot): significantly changed
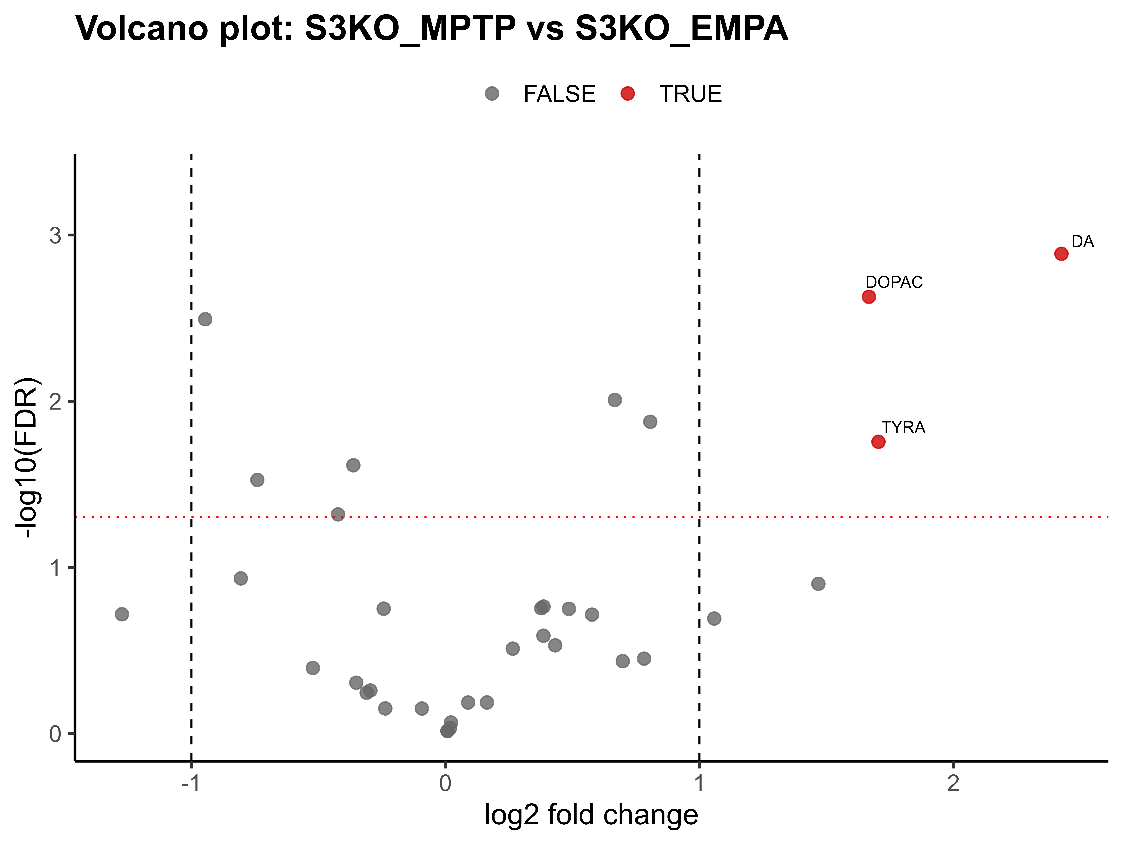


Volcano plot of the comparison of S3KO_MPTP and S3KO_EMPA groups. The figure shows the fold changes in the quantified metabolites between the groups. FALSE (grey dot): not significantly changed; TRUE (red dot): significantly changed


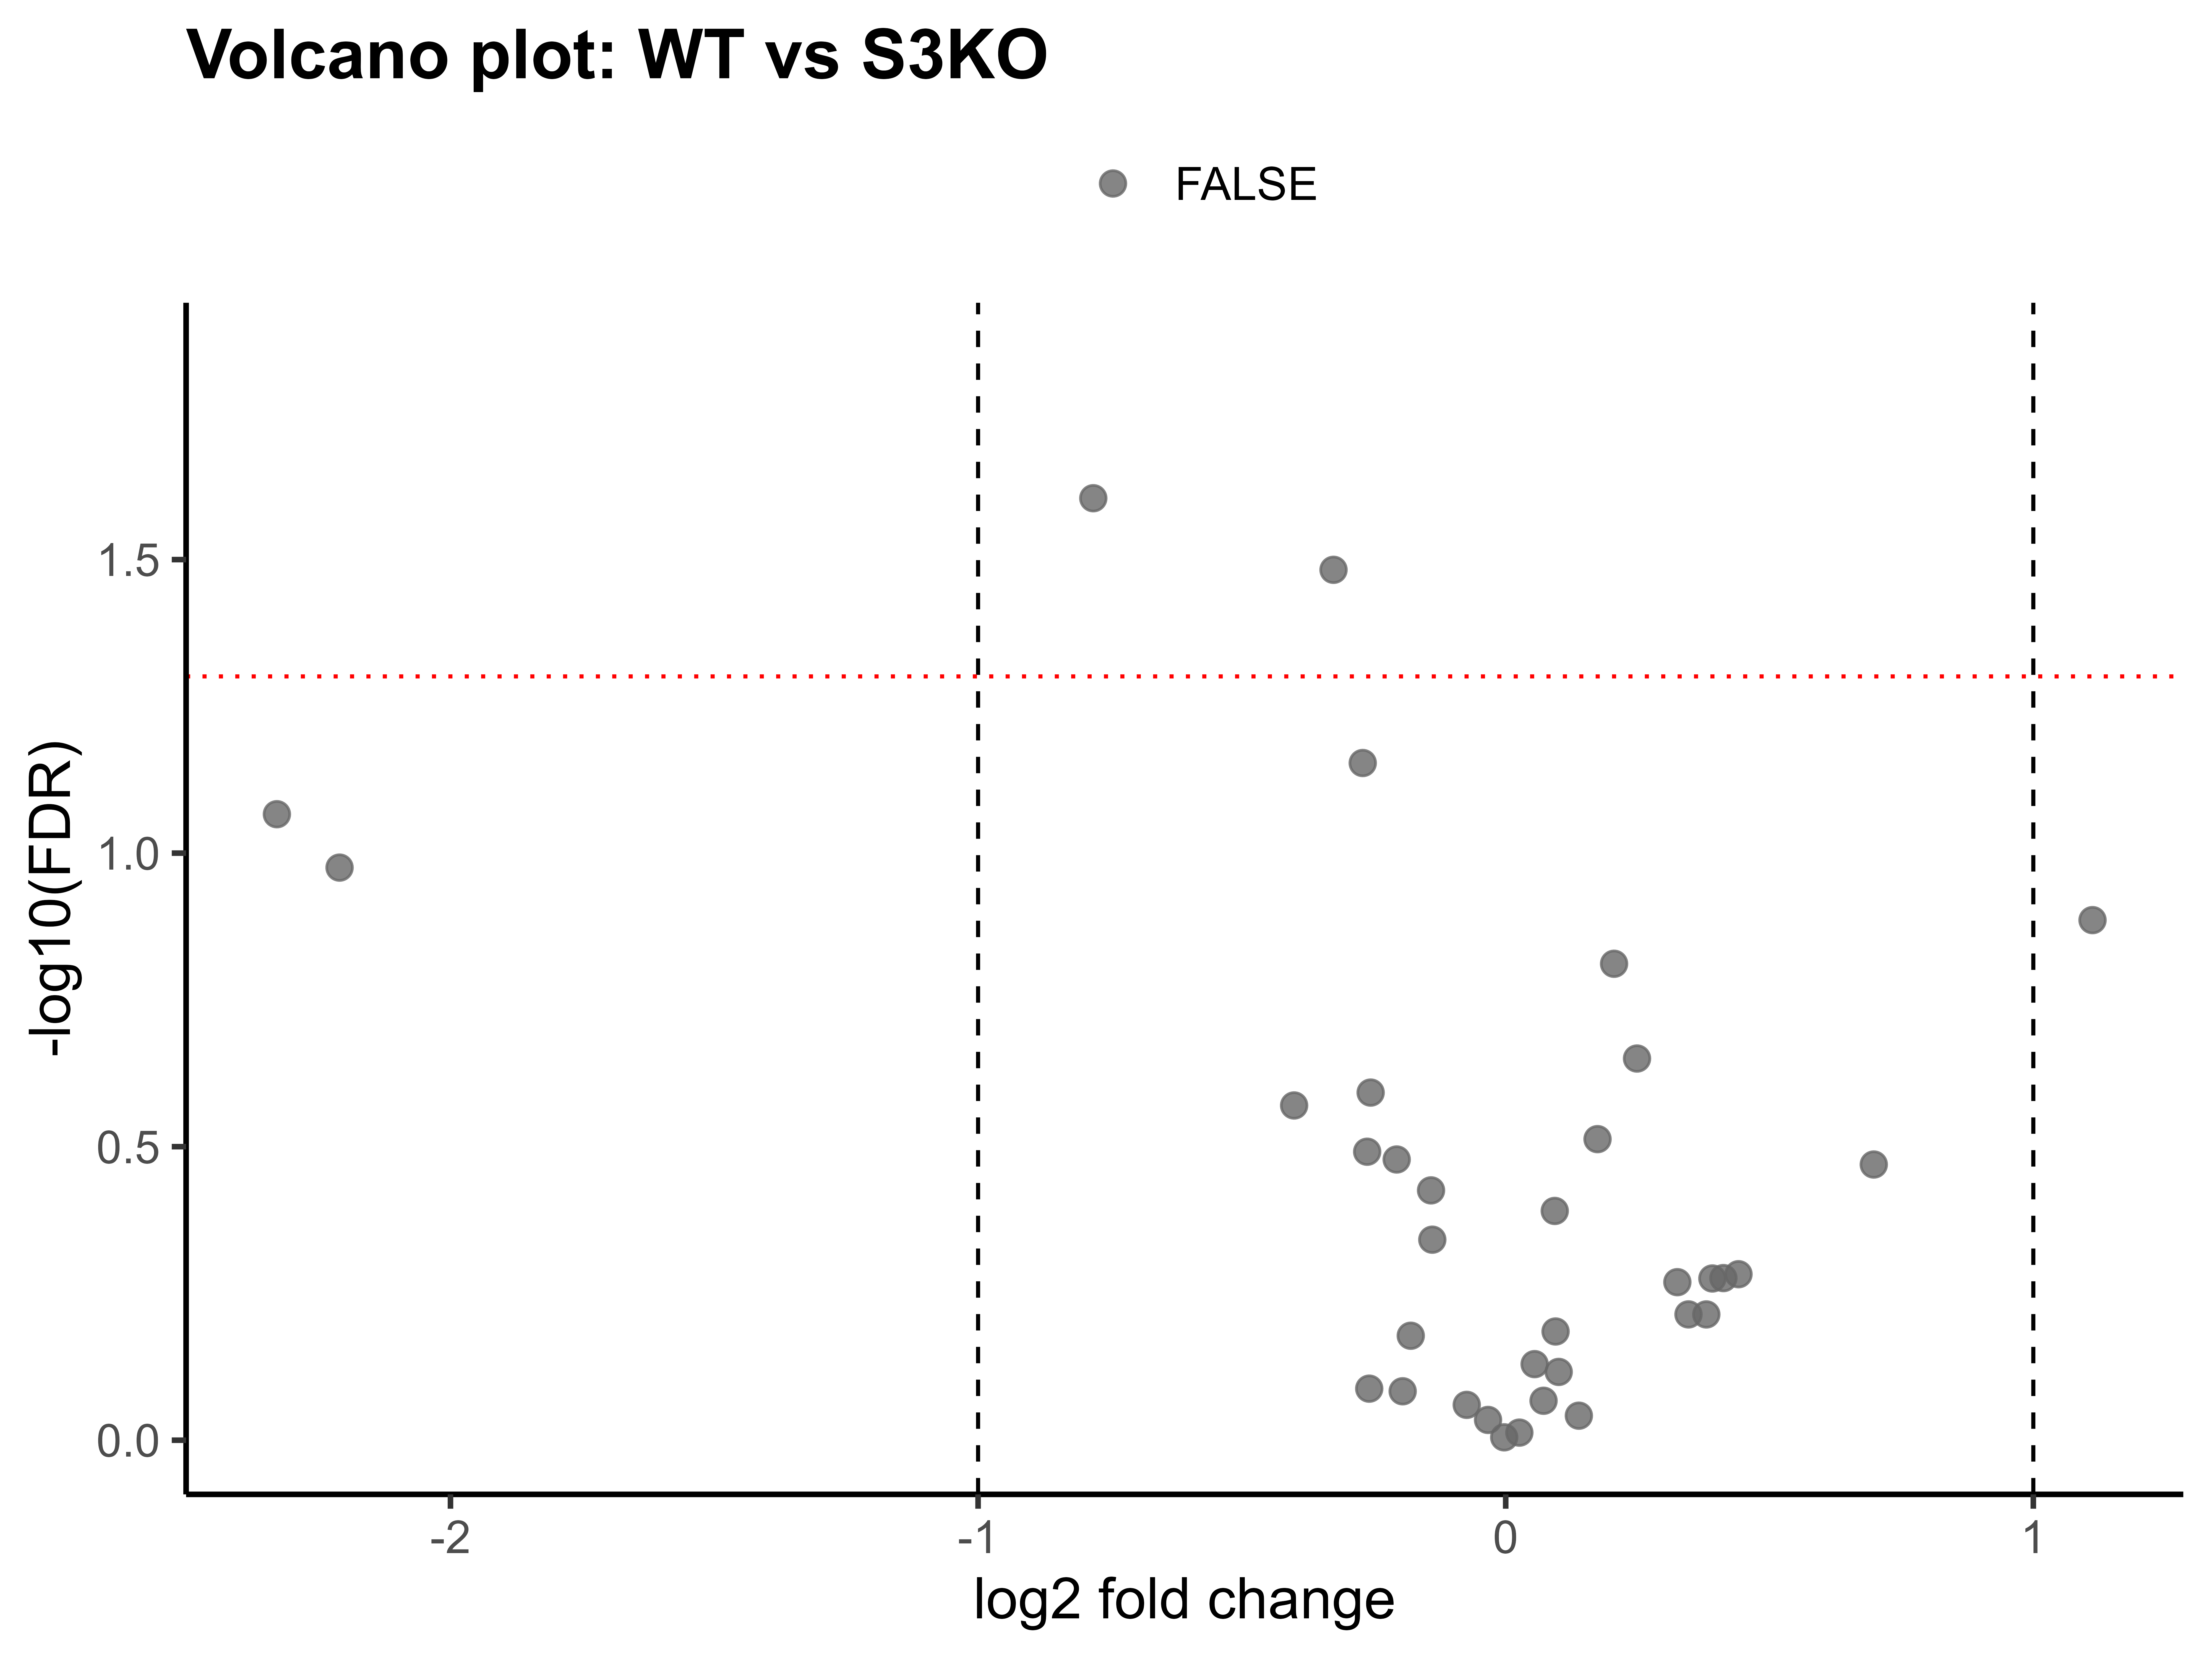


Volcano plot of the comparison of WT and S3KO groups. The figure shows the fold changes in the quantified metabolites between the groups. FALSE (grey dot): not significantly changed; TRUE (red dot): significantly changed
