# Supplementary material for: Targeted metabolomics to assess positive effects of empagliflozin in a Parkinson's disease model – focused on the kynurenine pathway and oxidative stress
Source: Research Square preprint supplement (doi:10.21203/rs.3.rs-8658213/v1), 2026-02-07
Supplement: Supplementary file 4 [file c6090da452bb7f1237d7b965.docx]

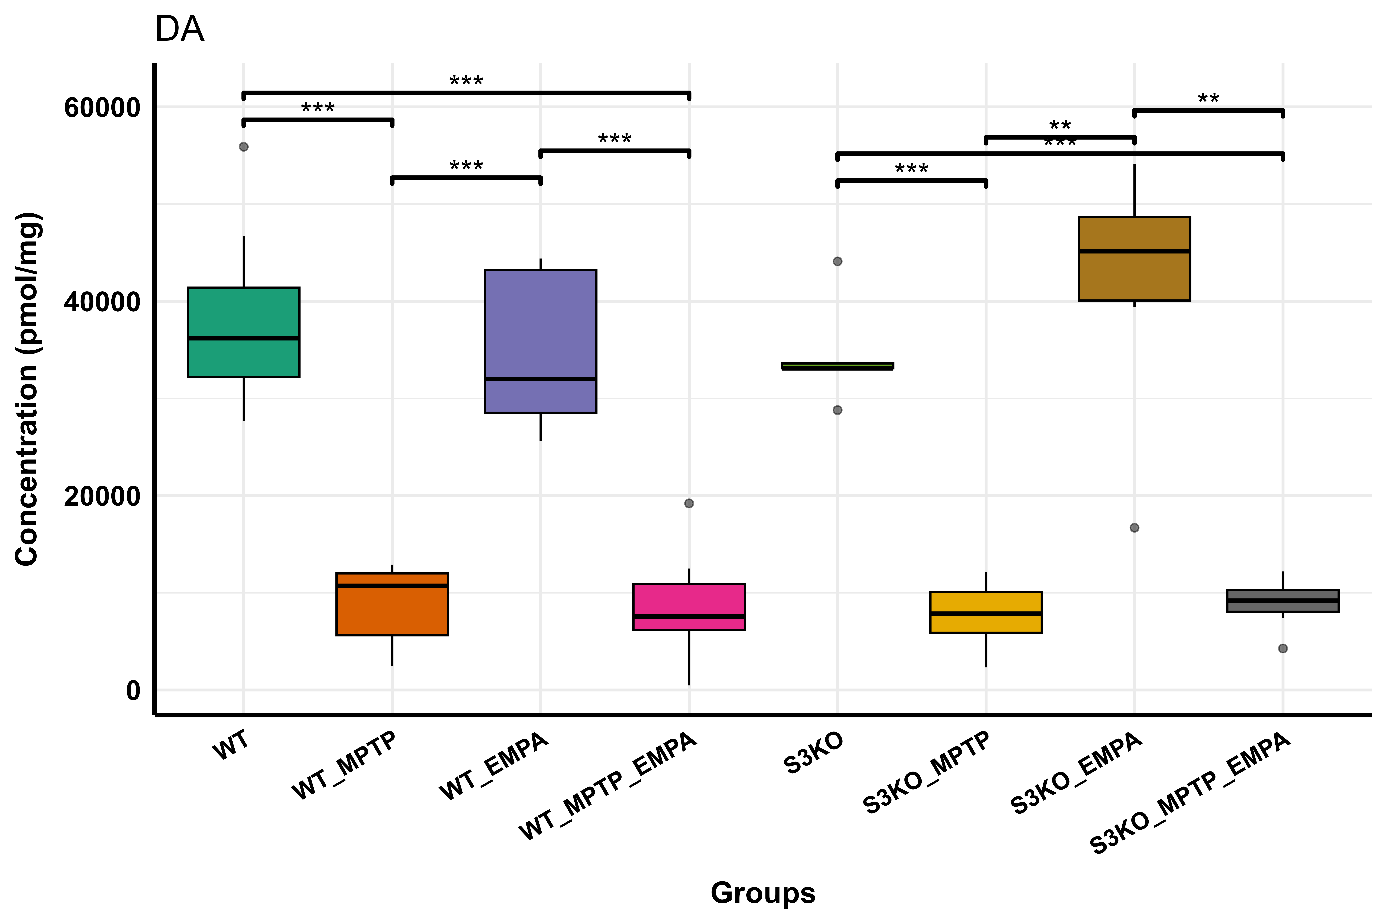


Boxplots of the comparison in DA levels between the 8 group.
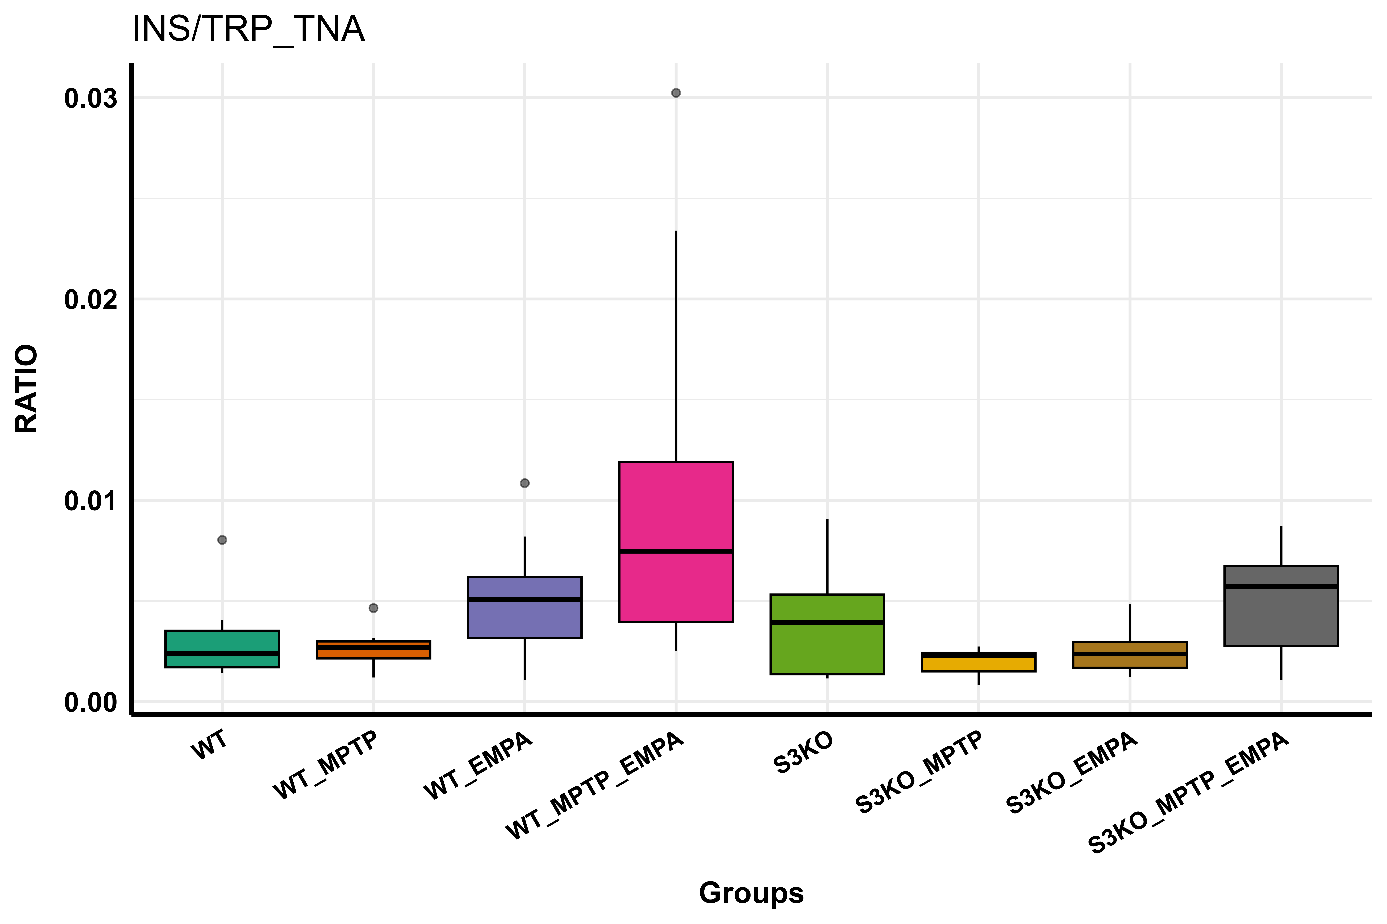


Boxplots of the comparison in INS/TRP_TNA levels between the 8 group.


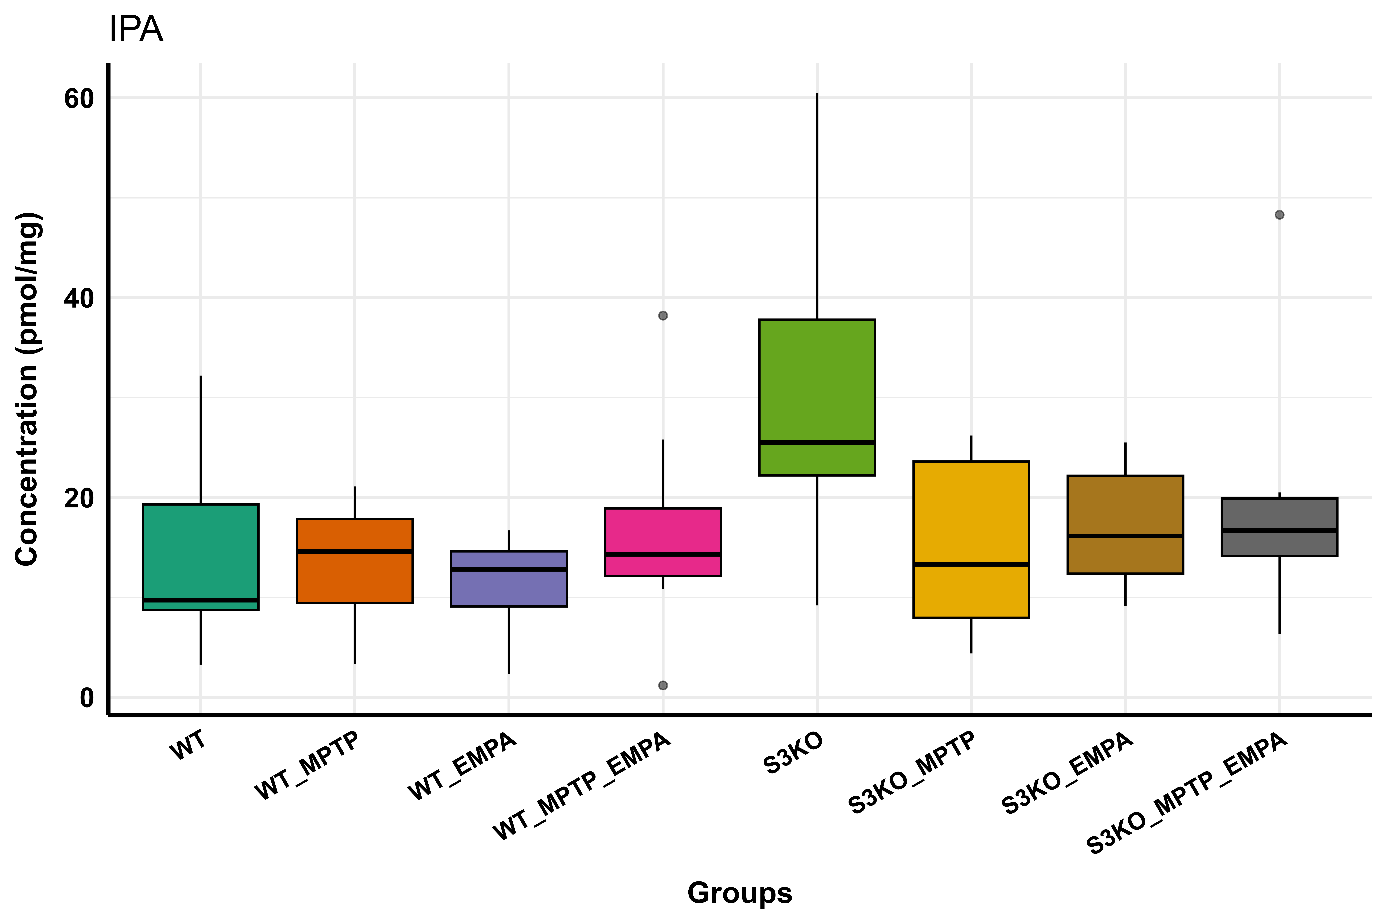


Boxplots of the comparison in IPA levels between the 8 group.
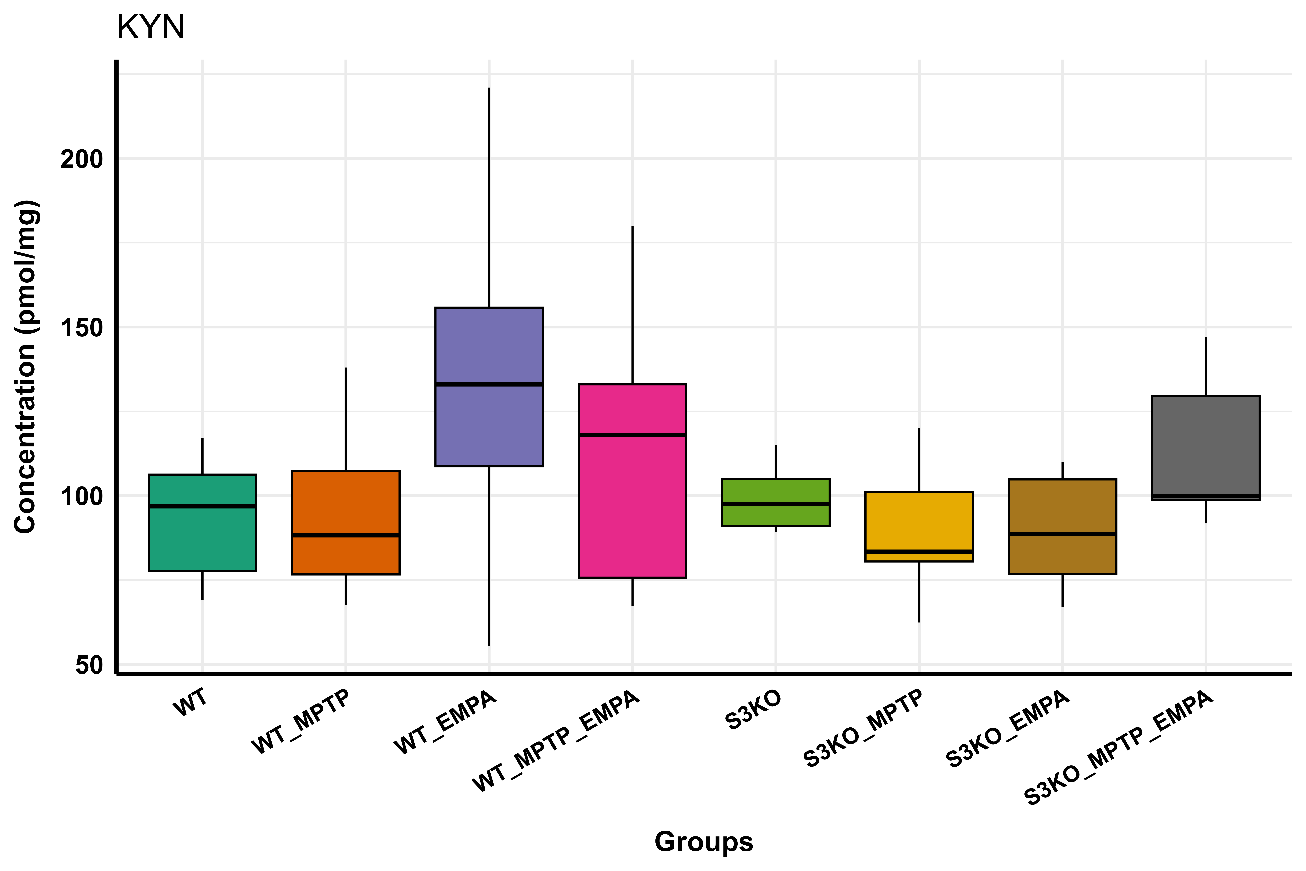


Boxplots of the comparison in KYN levels between the 8 group.


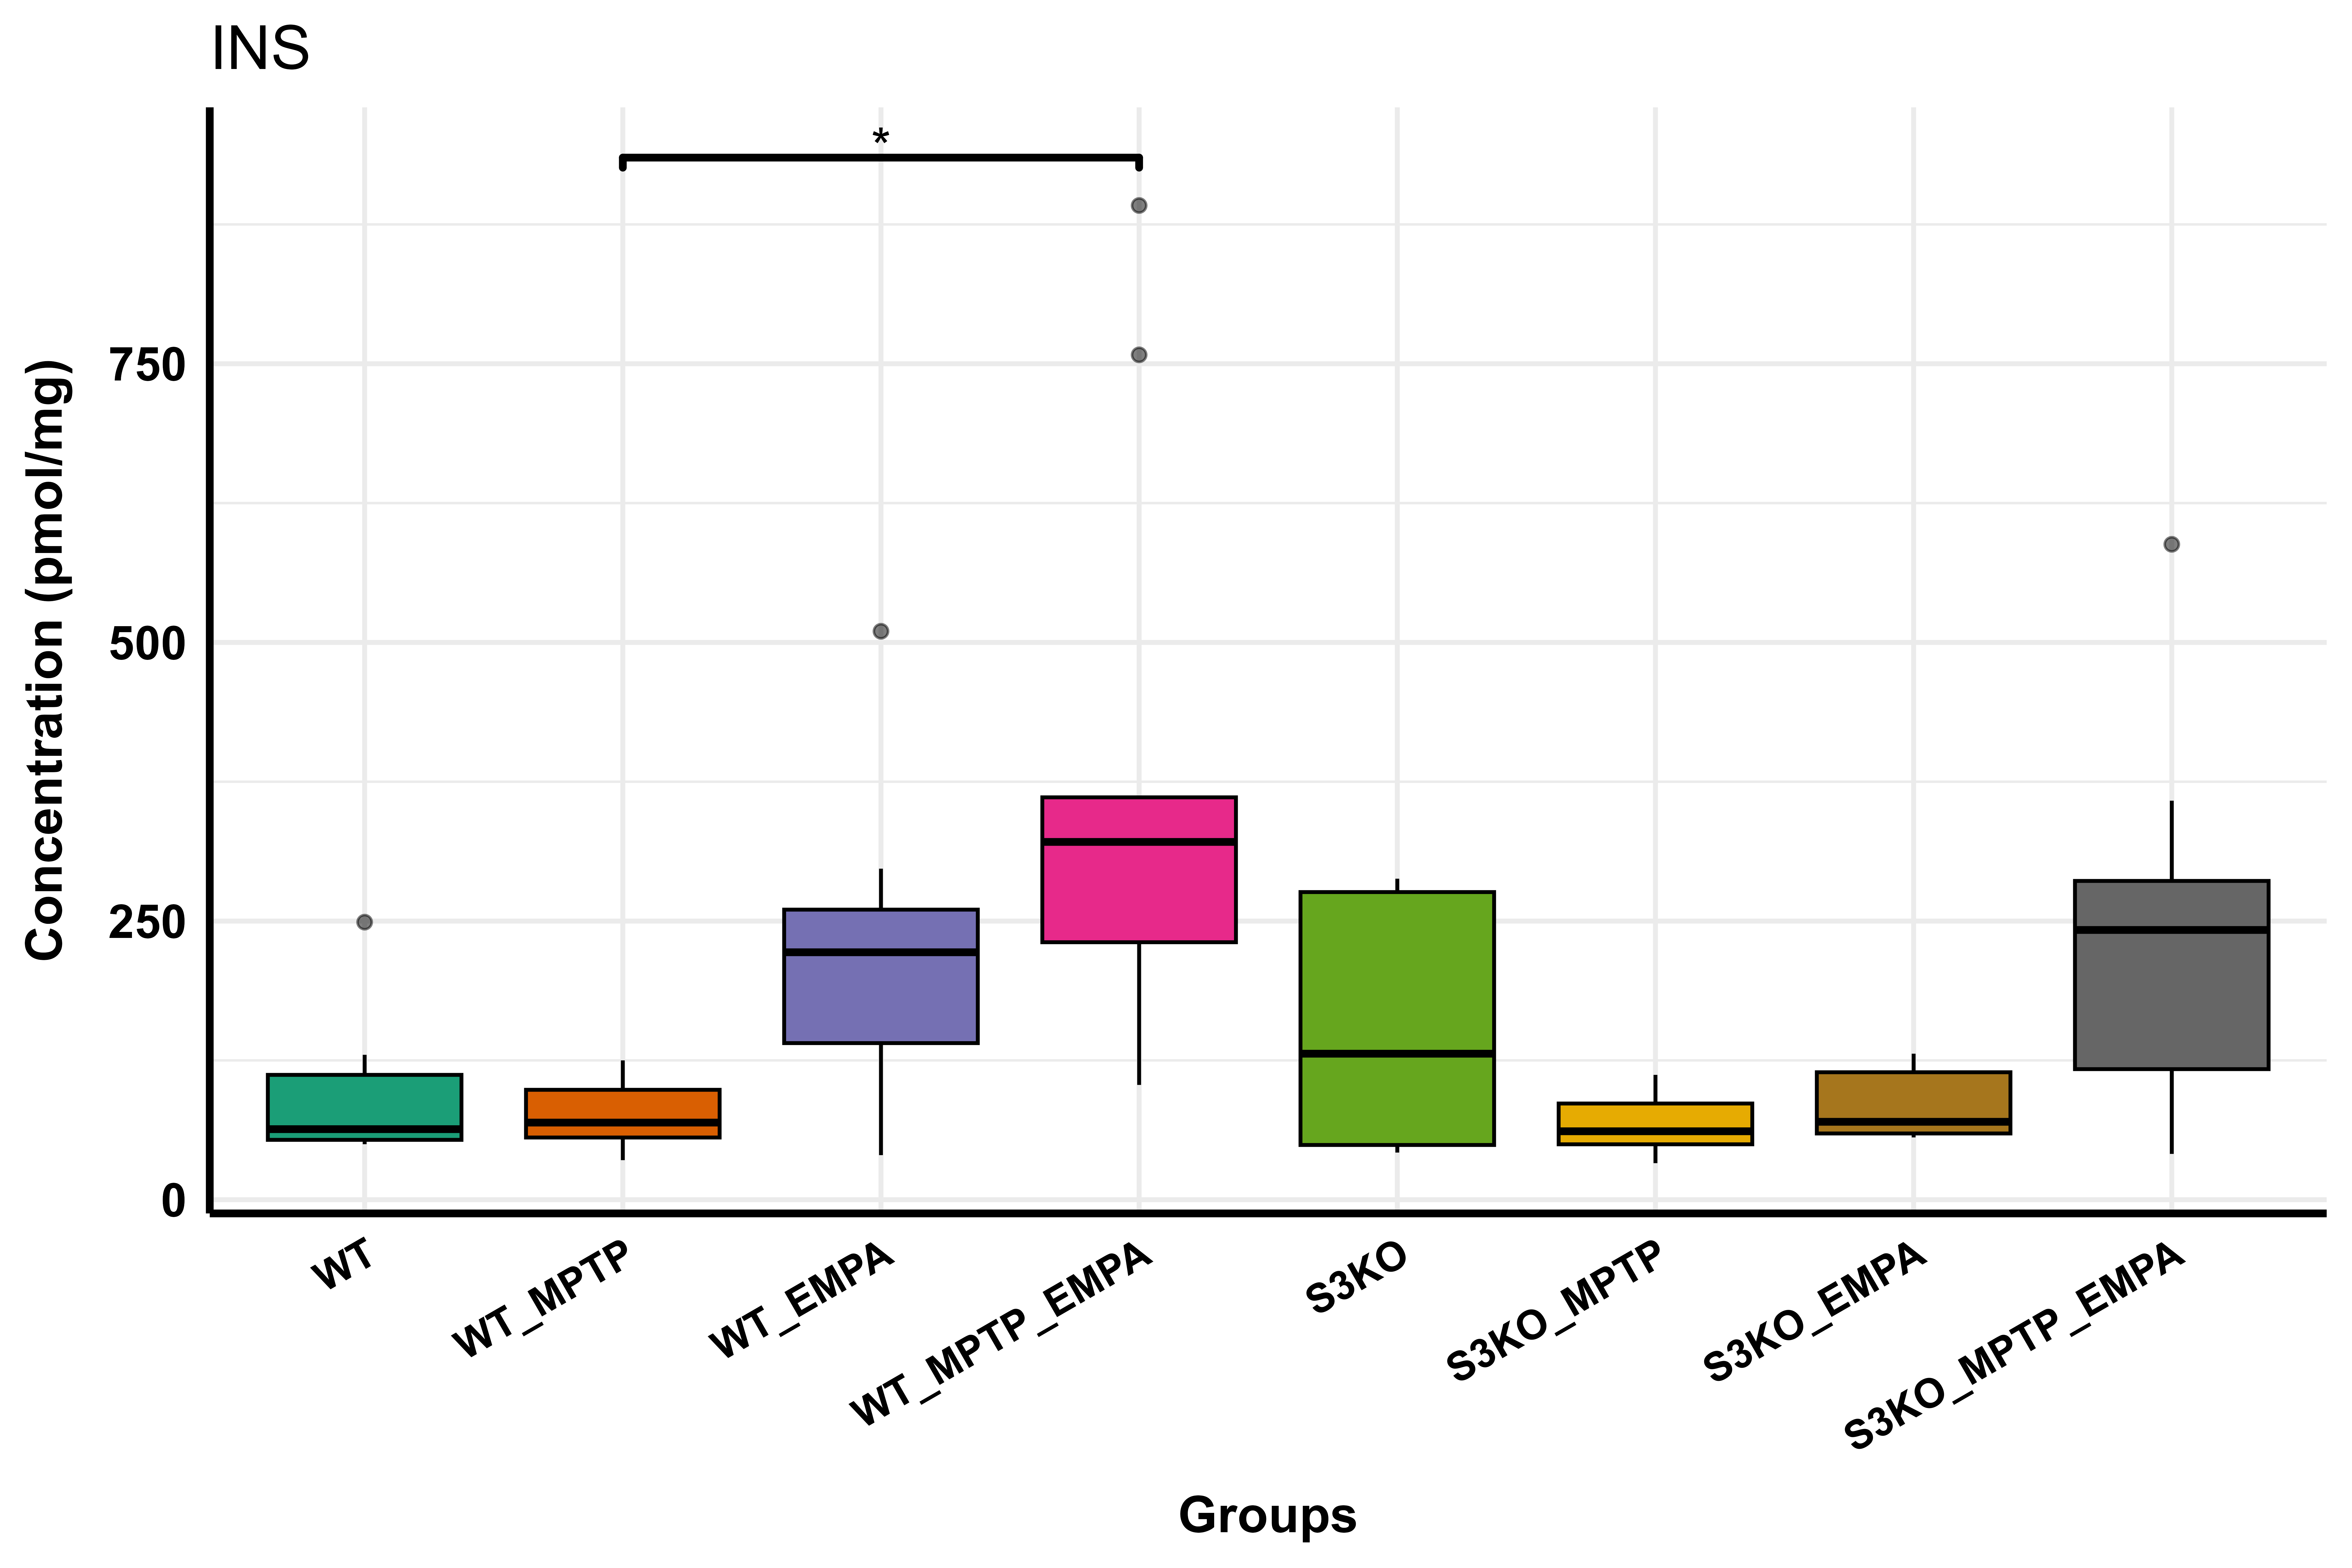


Boxplots of the comparison in INS levels between the 8 group.
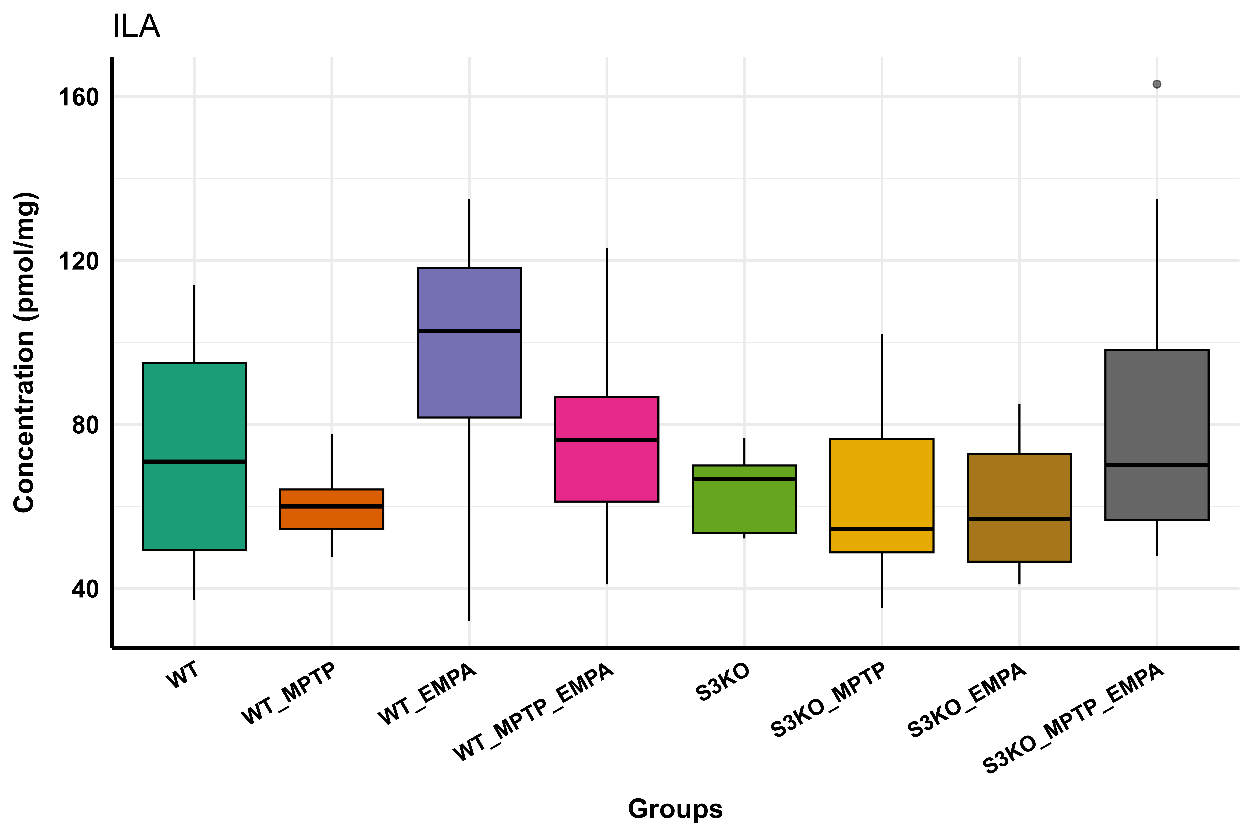


Boxplots of the comparison in ILA levels between the 8 group.


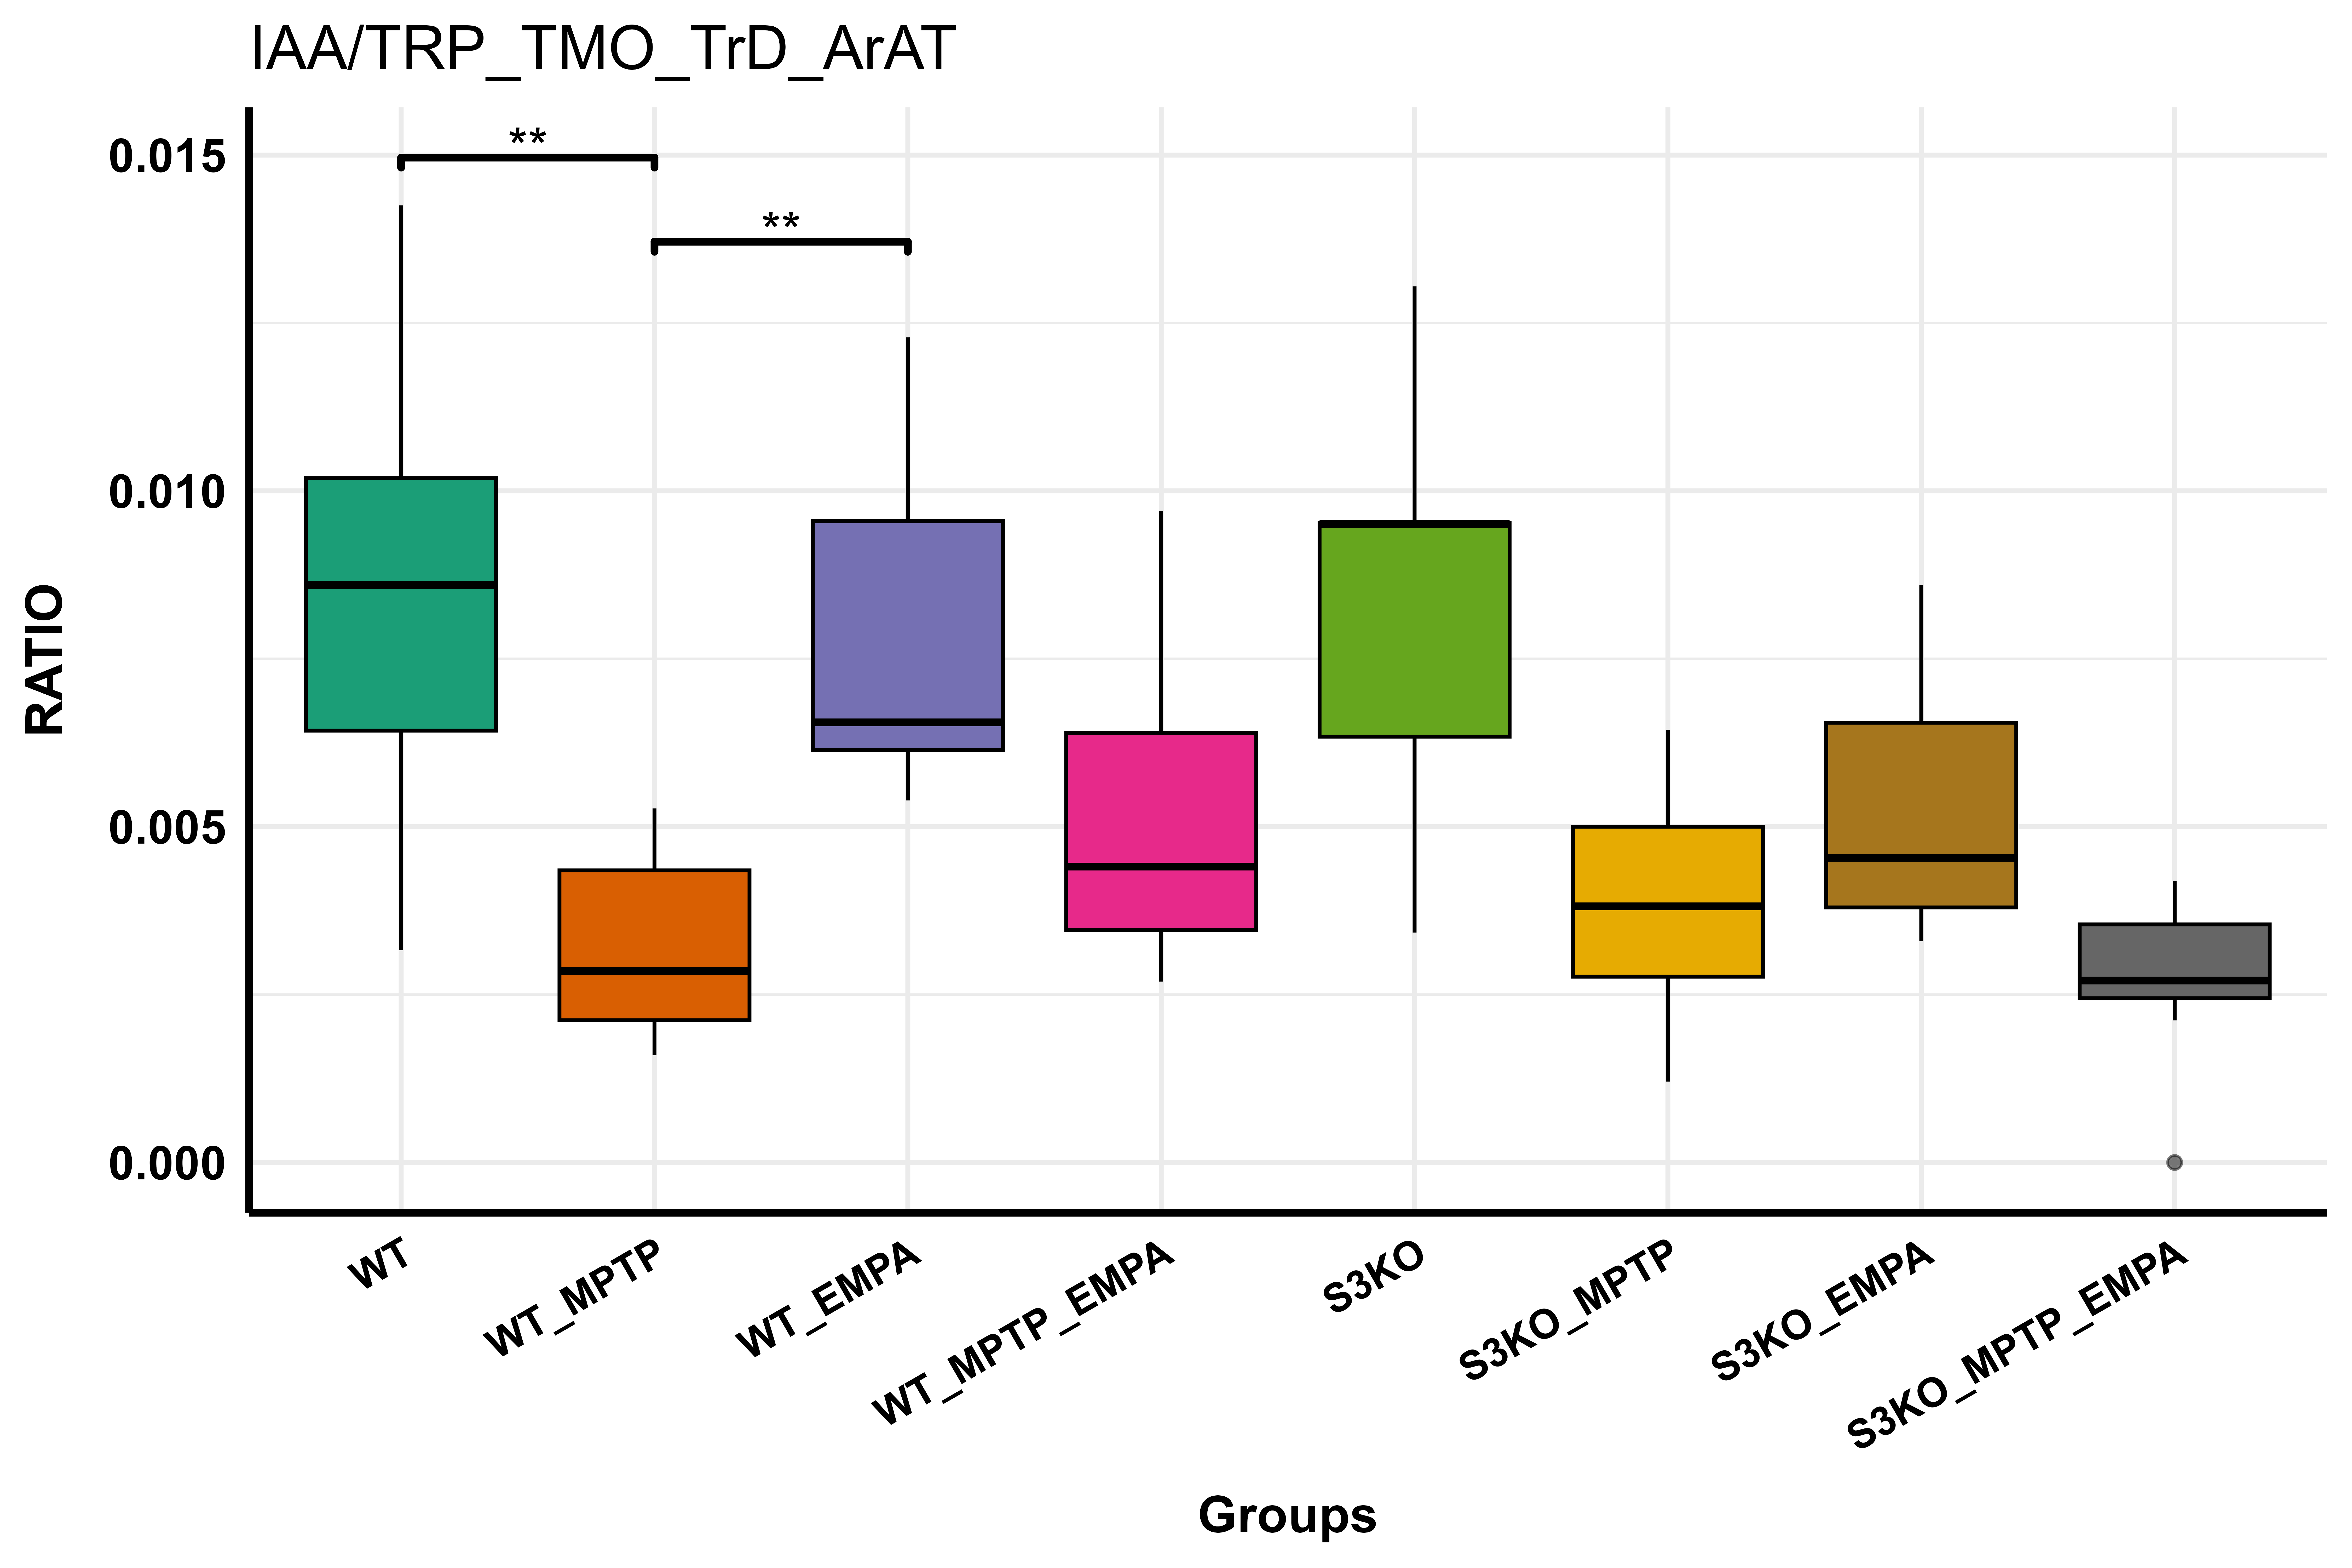


Boxplots of the comparison in IAA/TRP_TMO_TrD_ArAT levels between the 8 group.
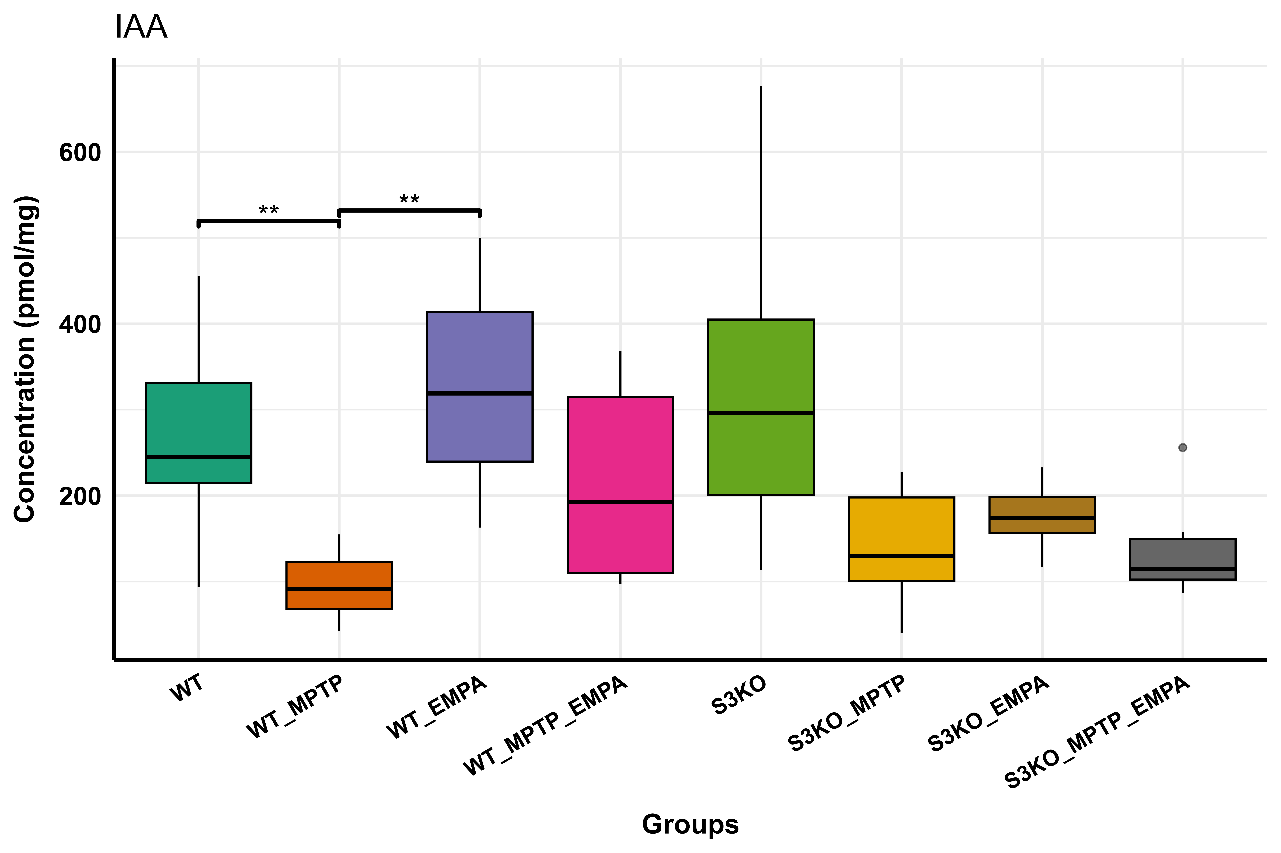


Boxplots of the comparison in IAA levels between the 8 group.


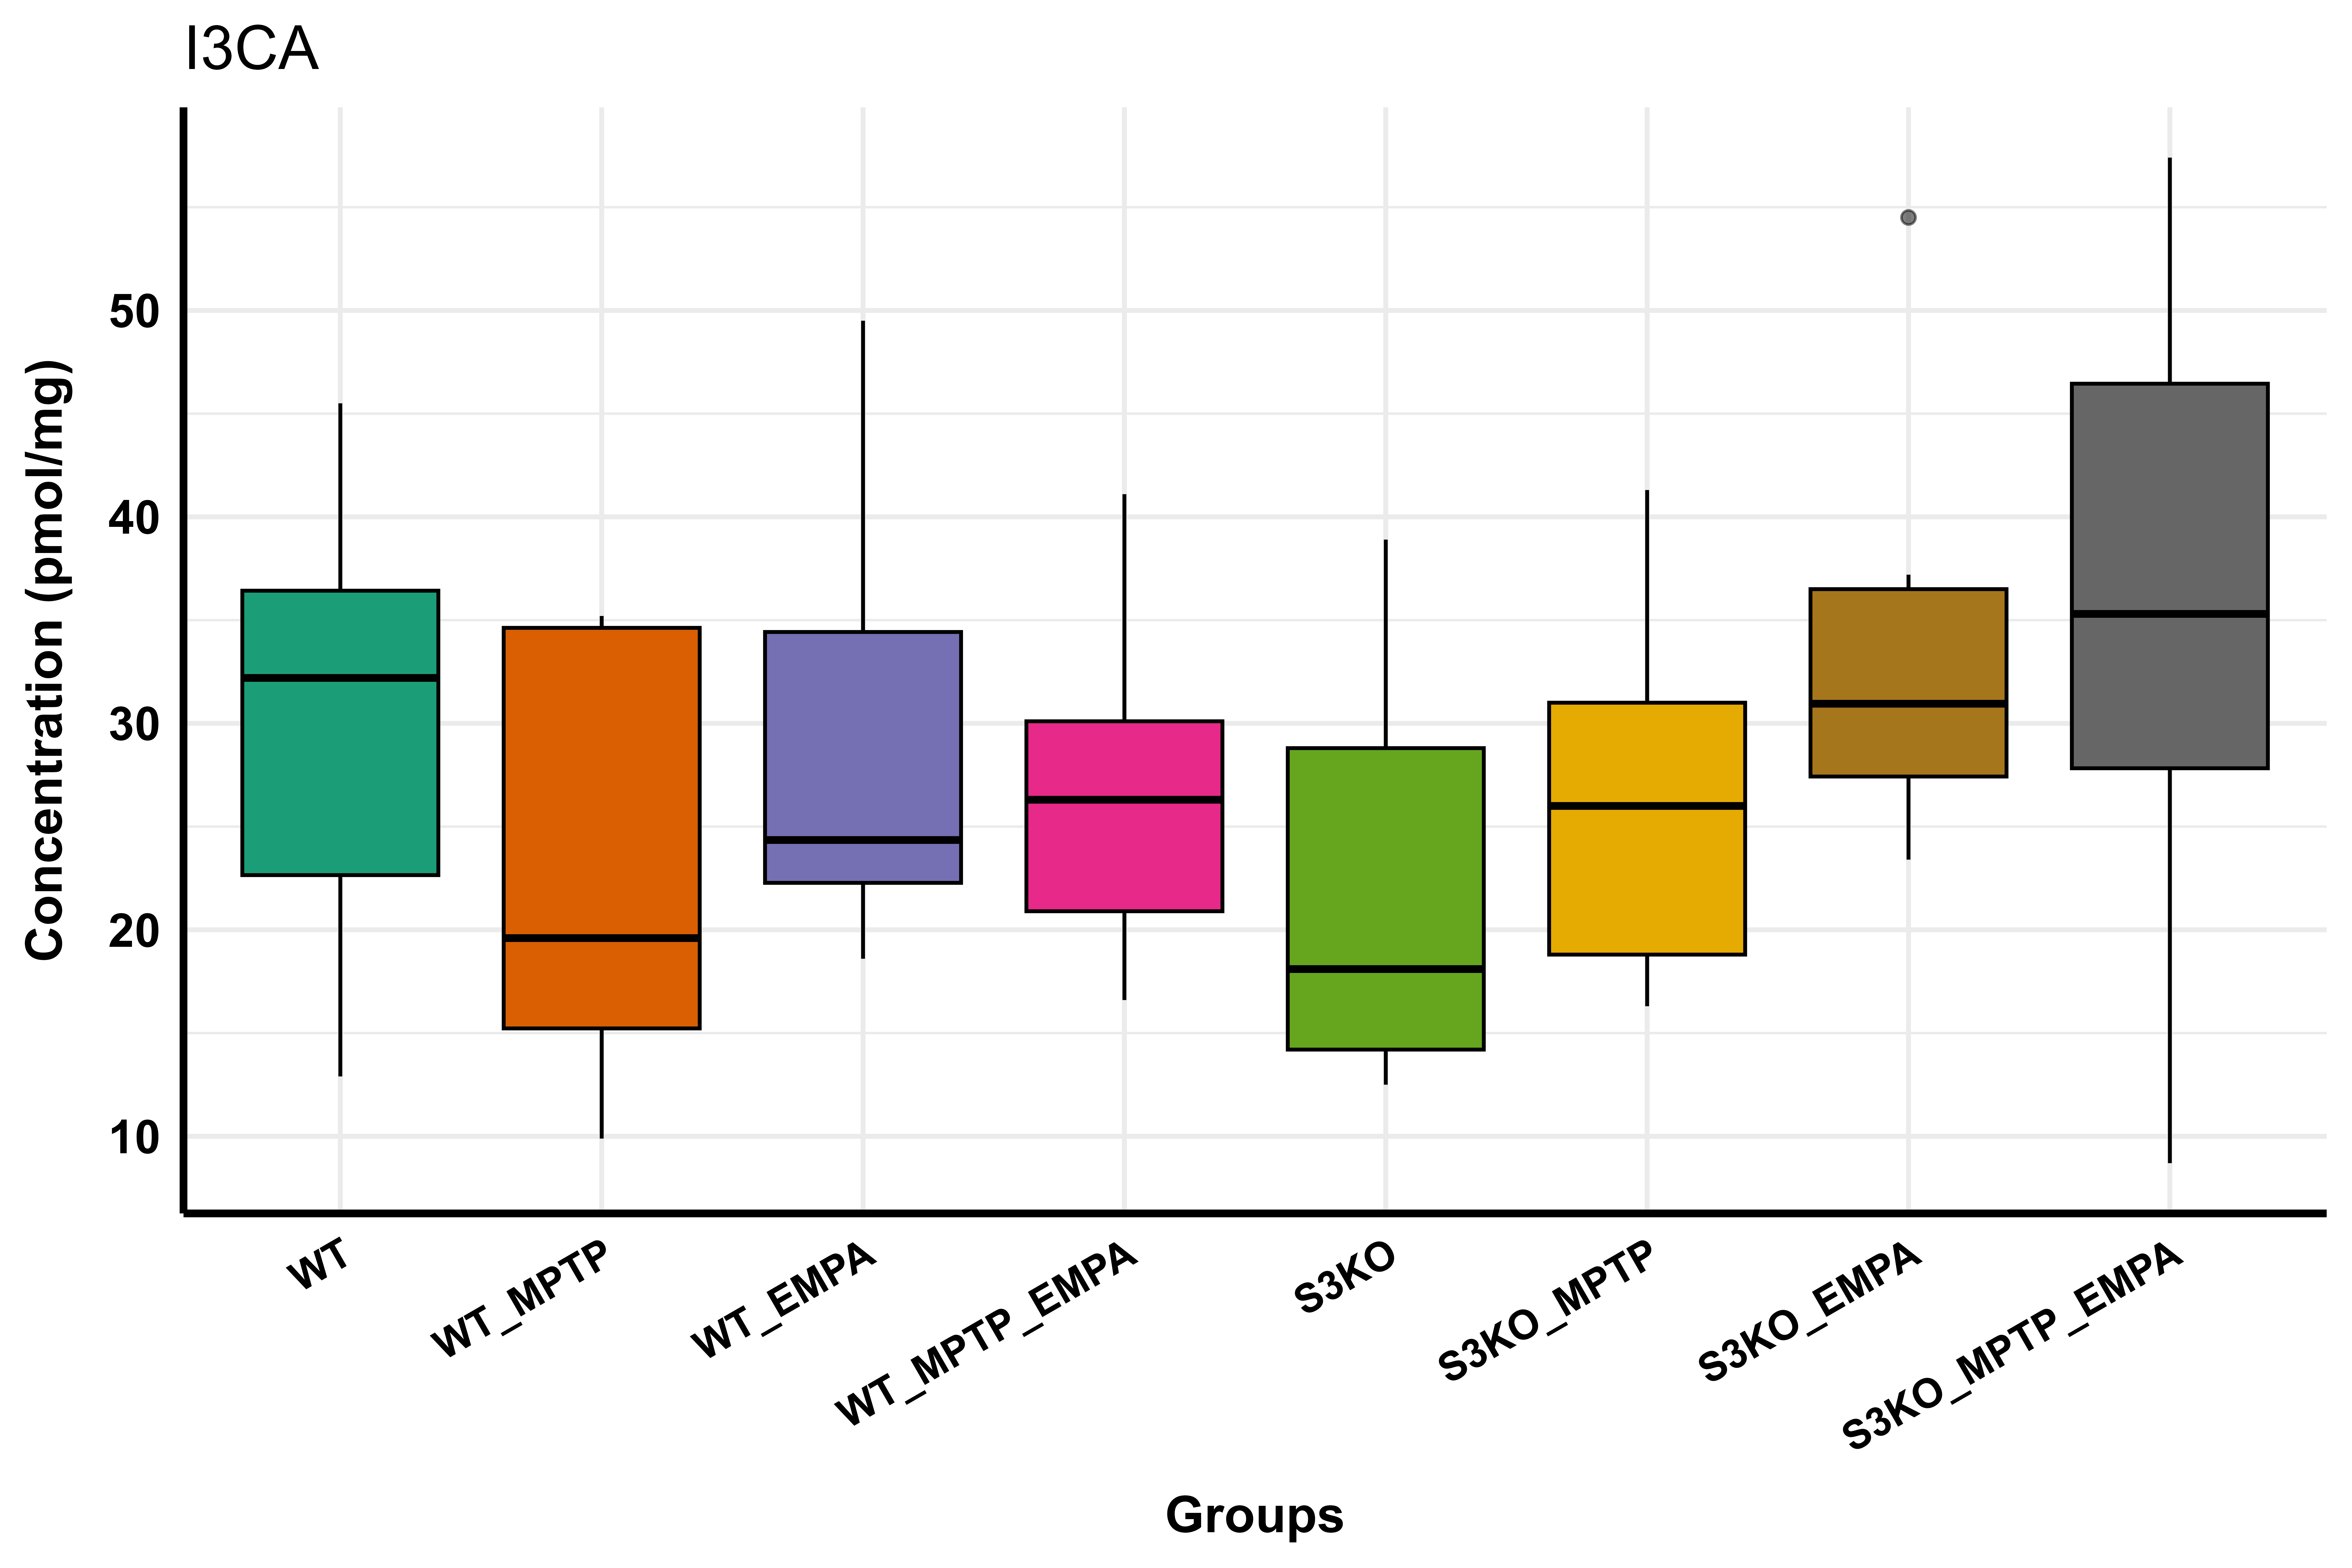


Boxplots of the comparison in I3CA levels between the 8 group.
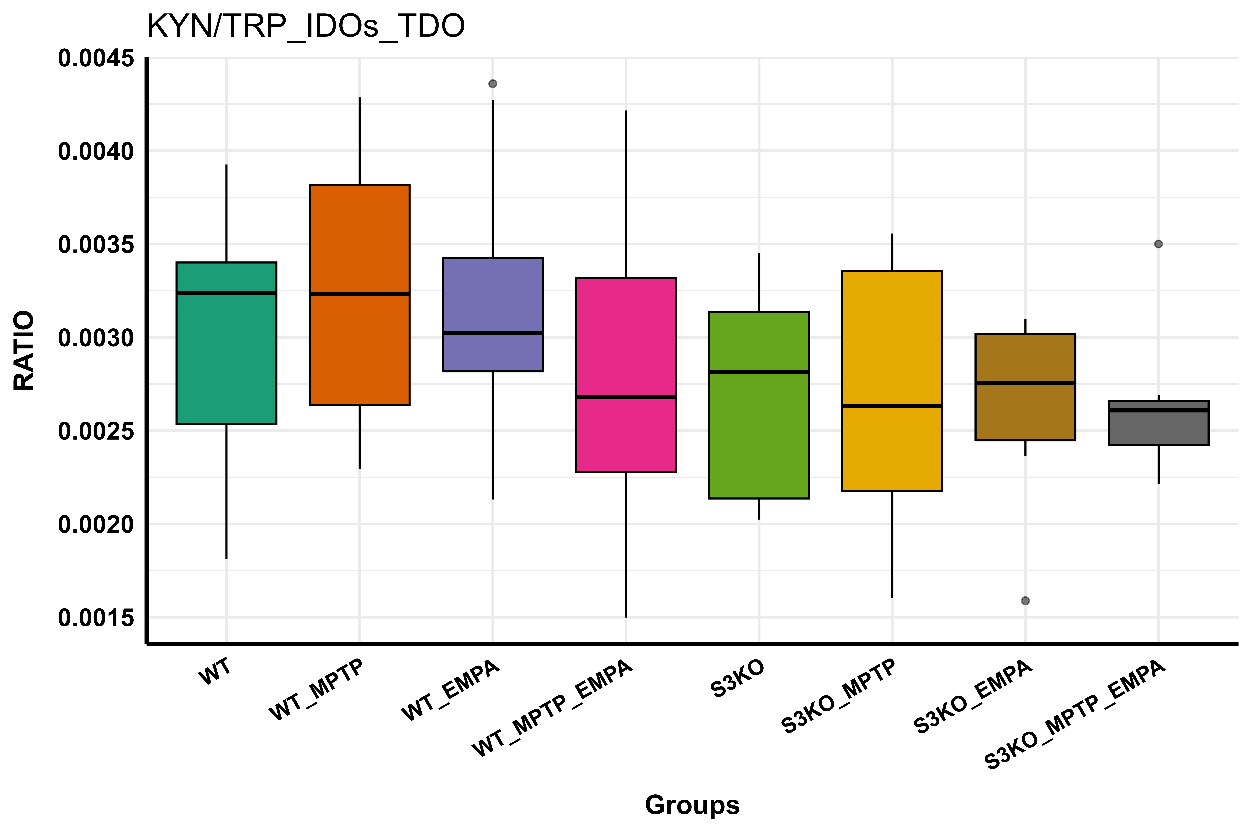


Boxplots of the comparison in KYN/TRP_IDOs_TDO levels between the 8 group.


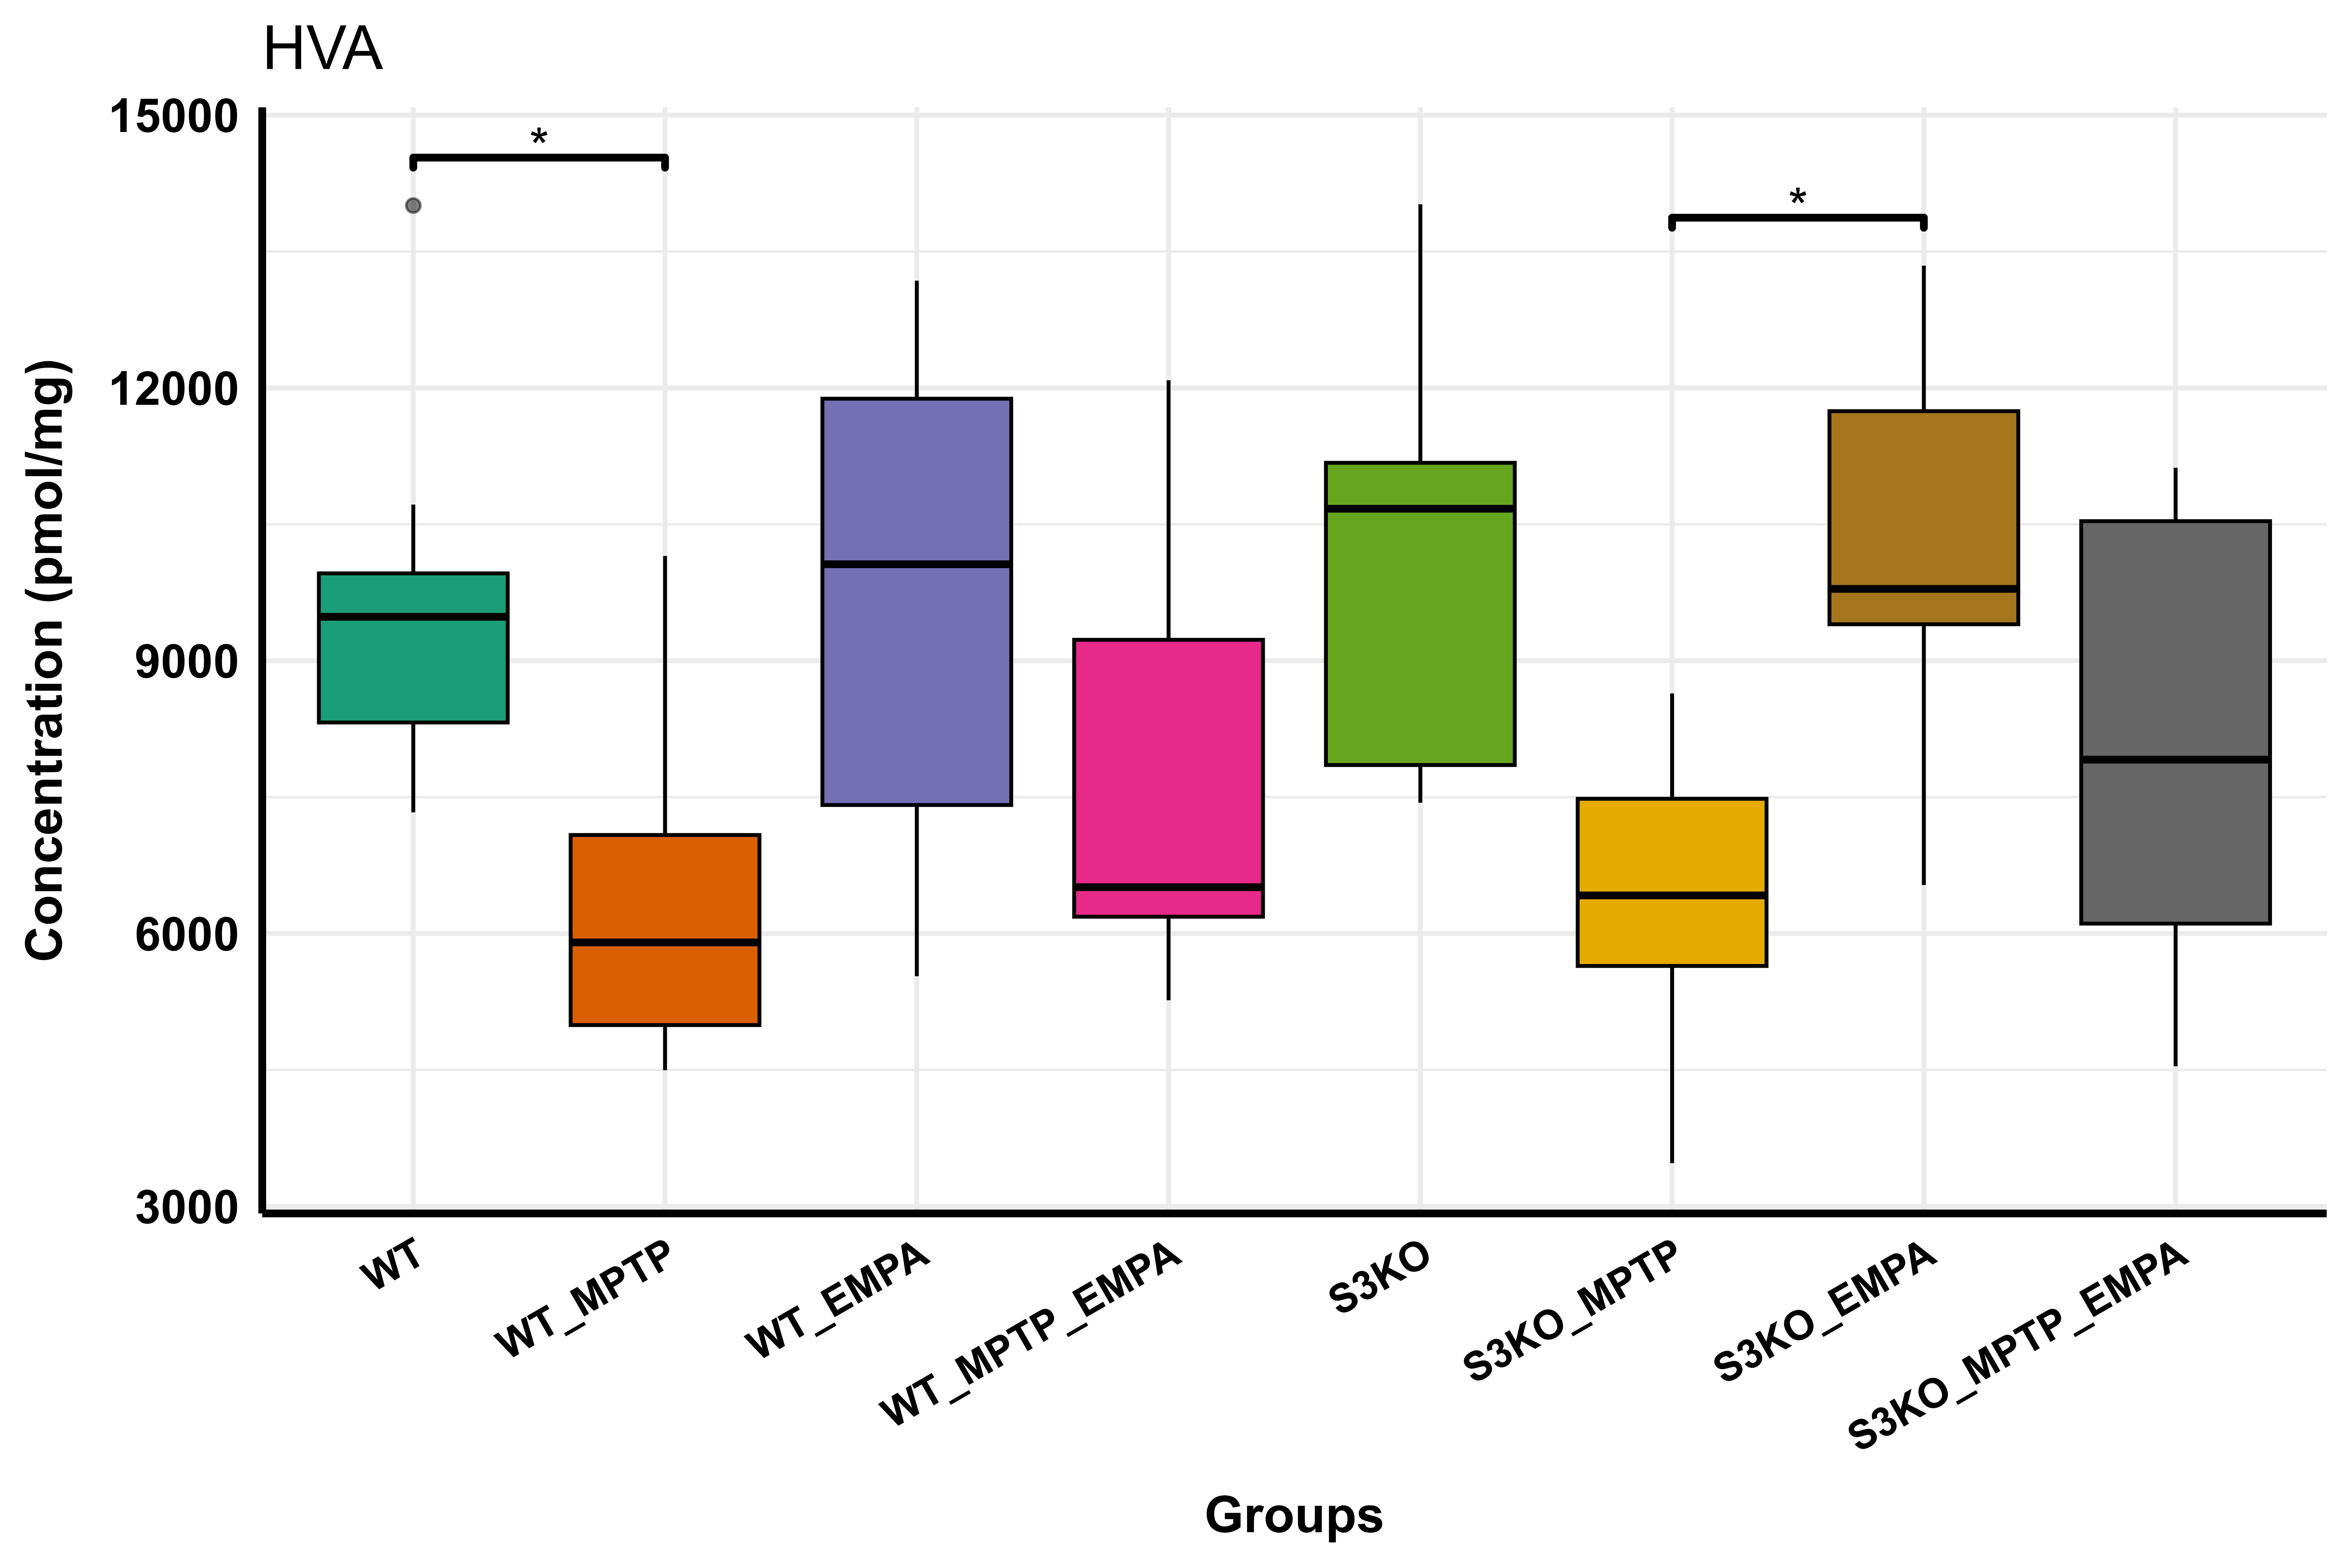


Boxplots of the comparison in HVA levels between the 8 group.
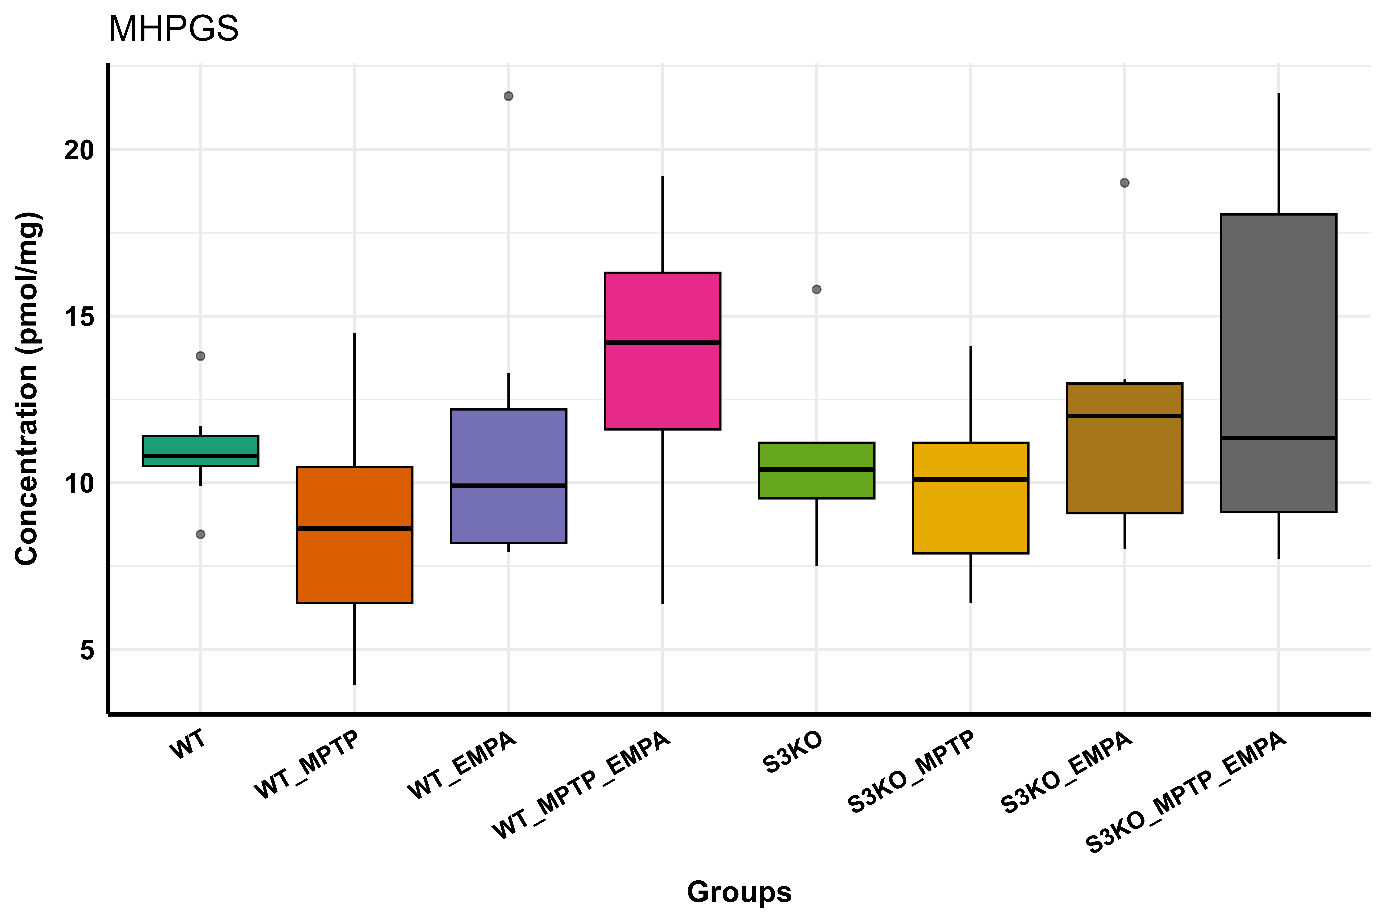


Boxplots of the comparison in MHPGS levels between the 8 group.


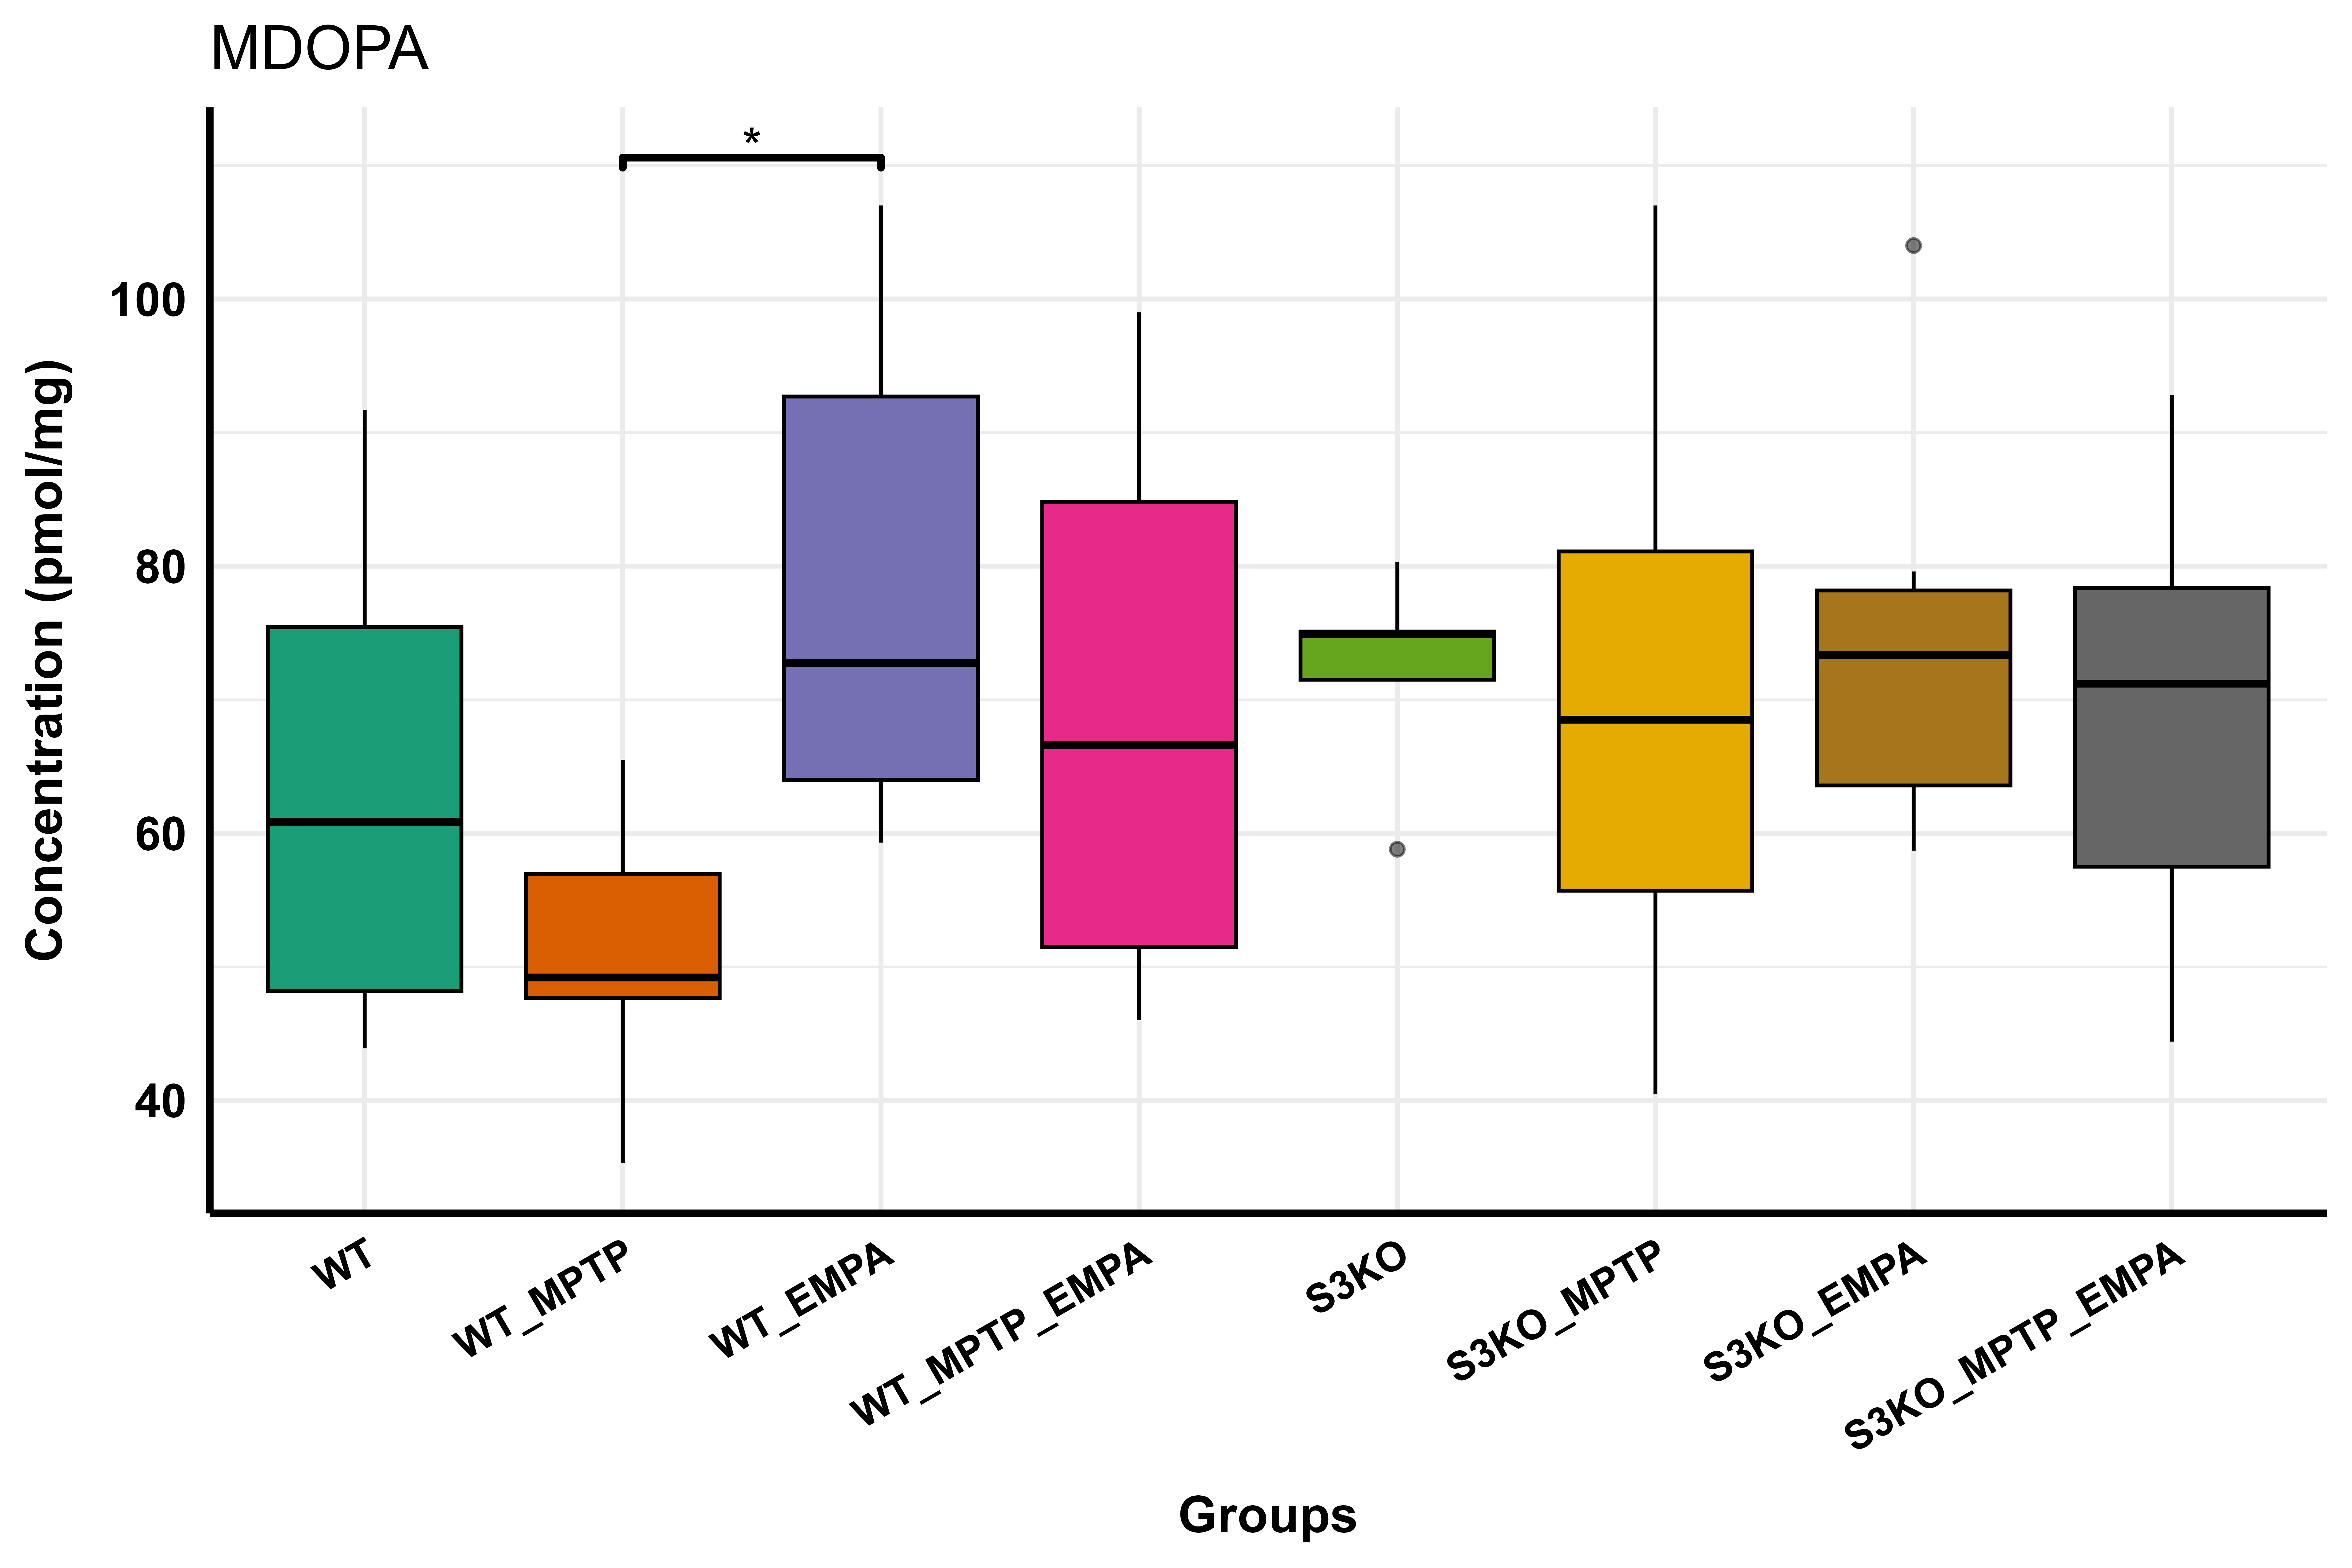


Boxplots of the comparison in MDOPA levels between the 8 group.


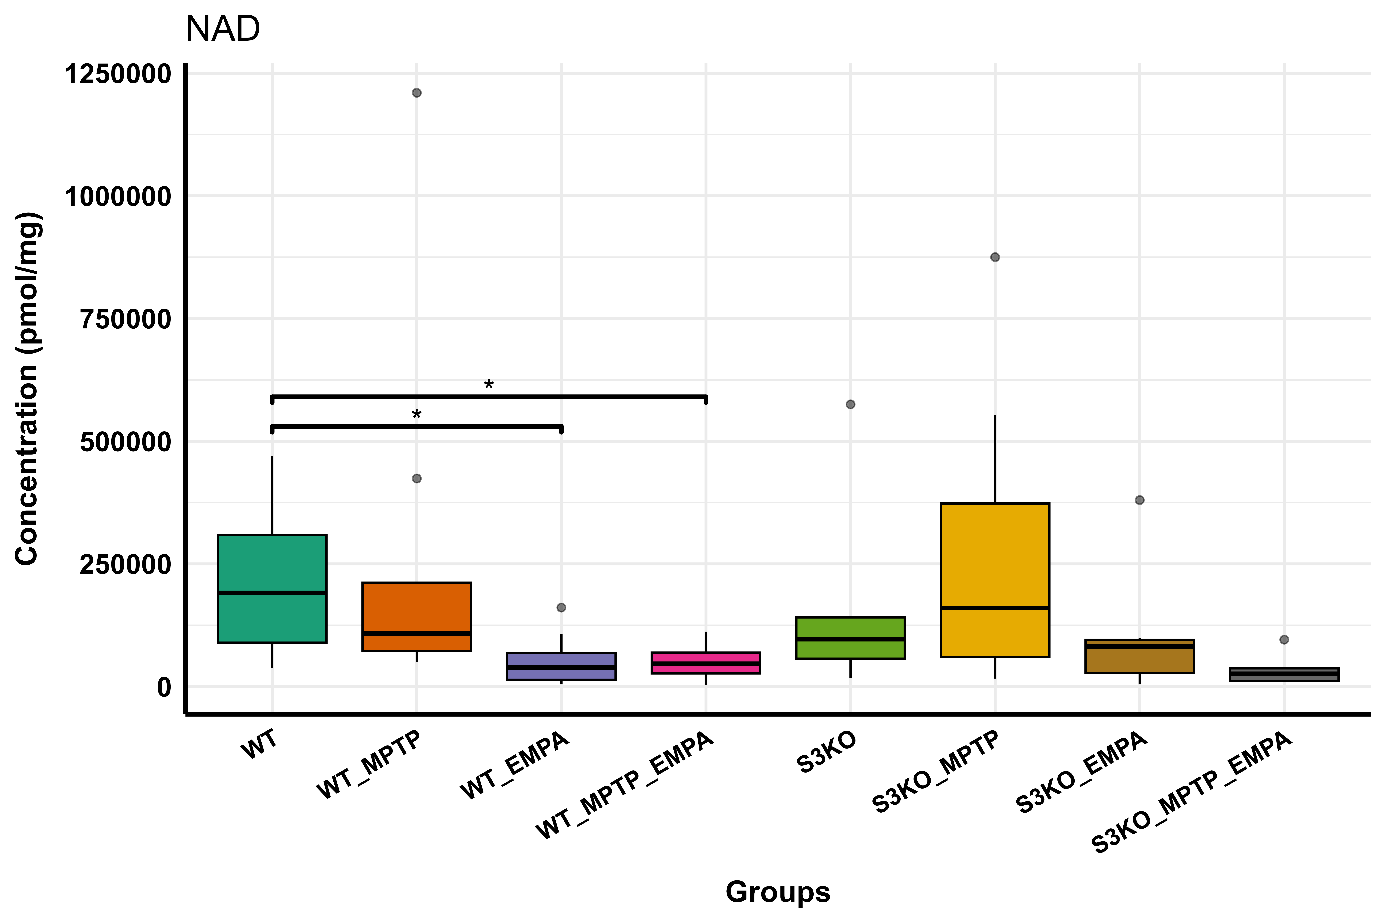


Boxplots of the comparison in NAD levels between the 8 group.


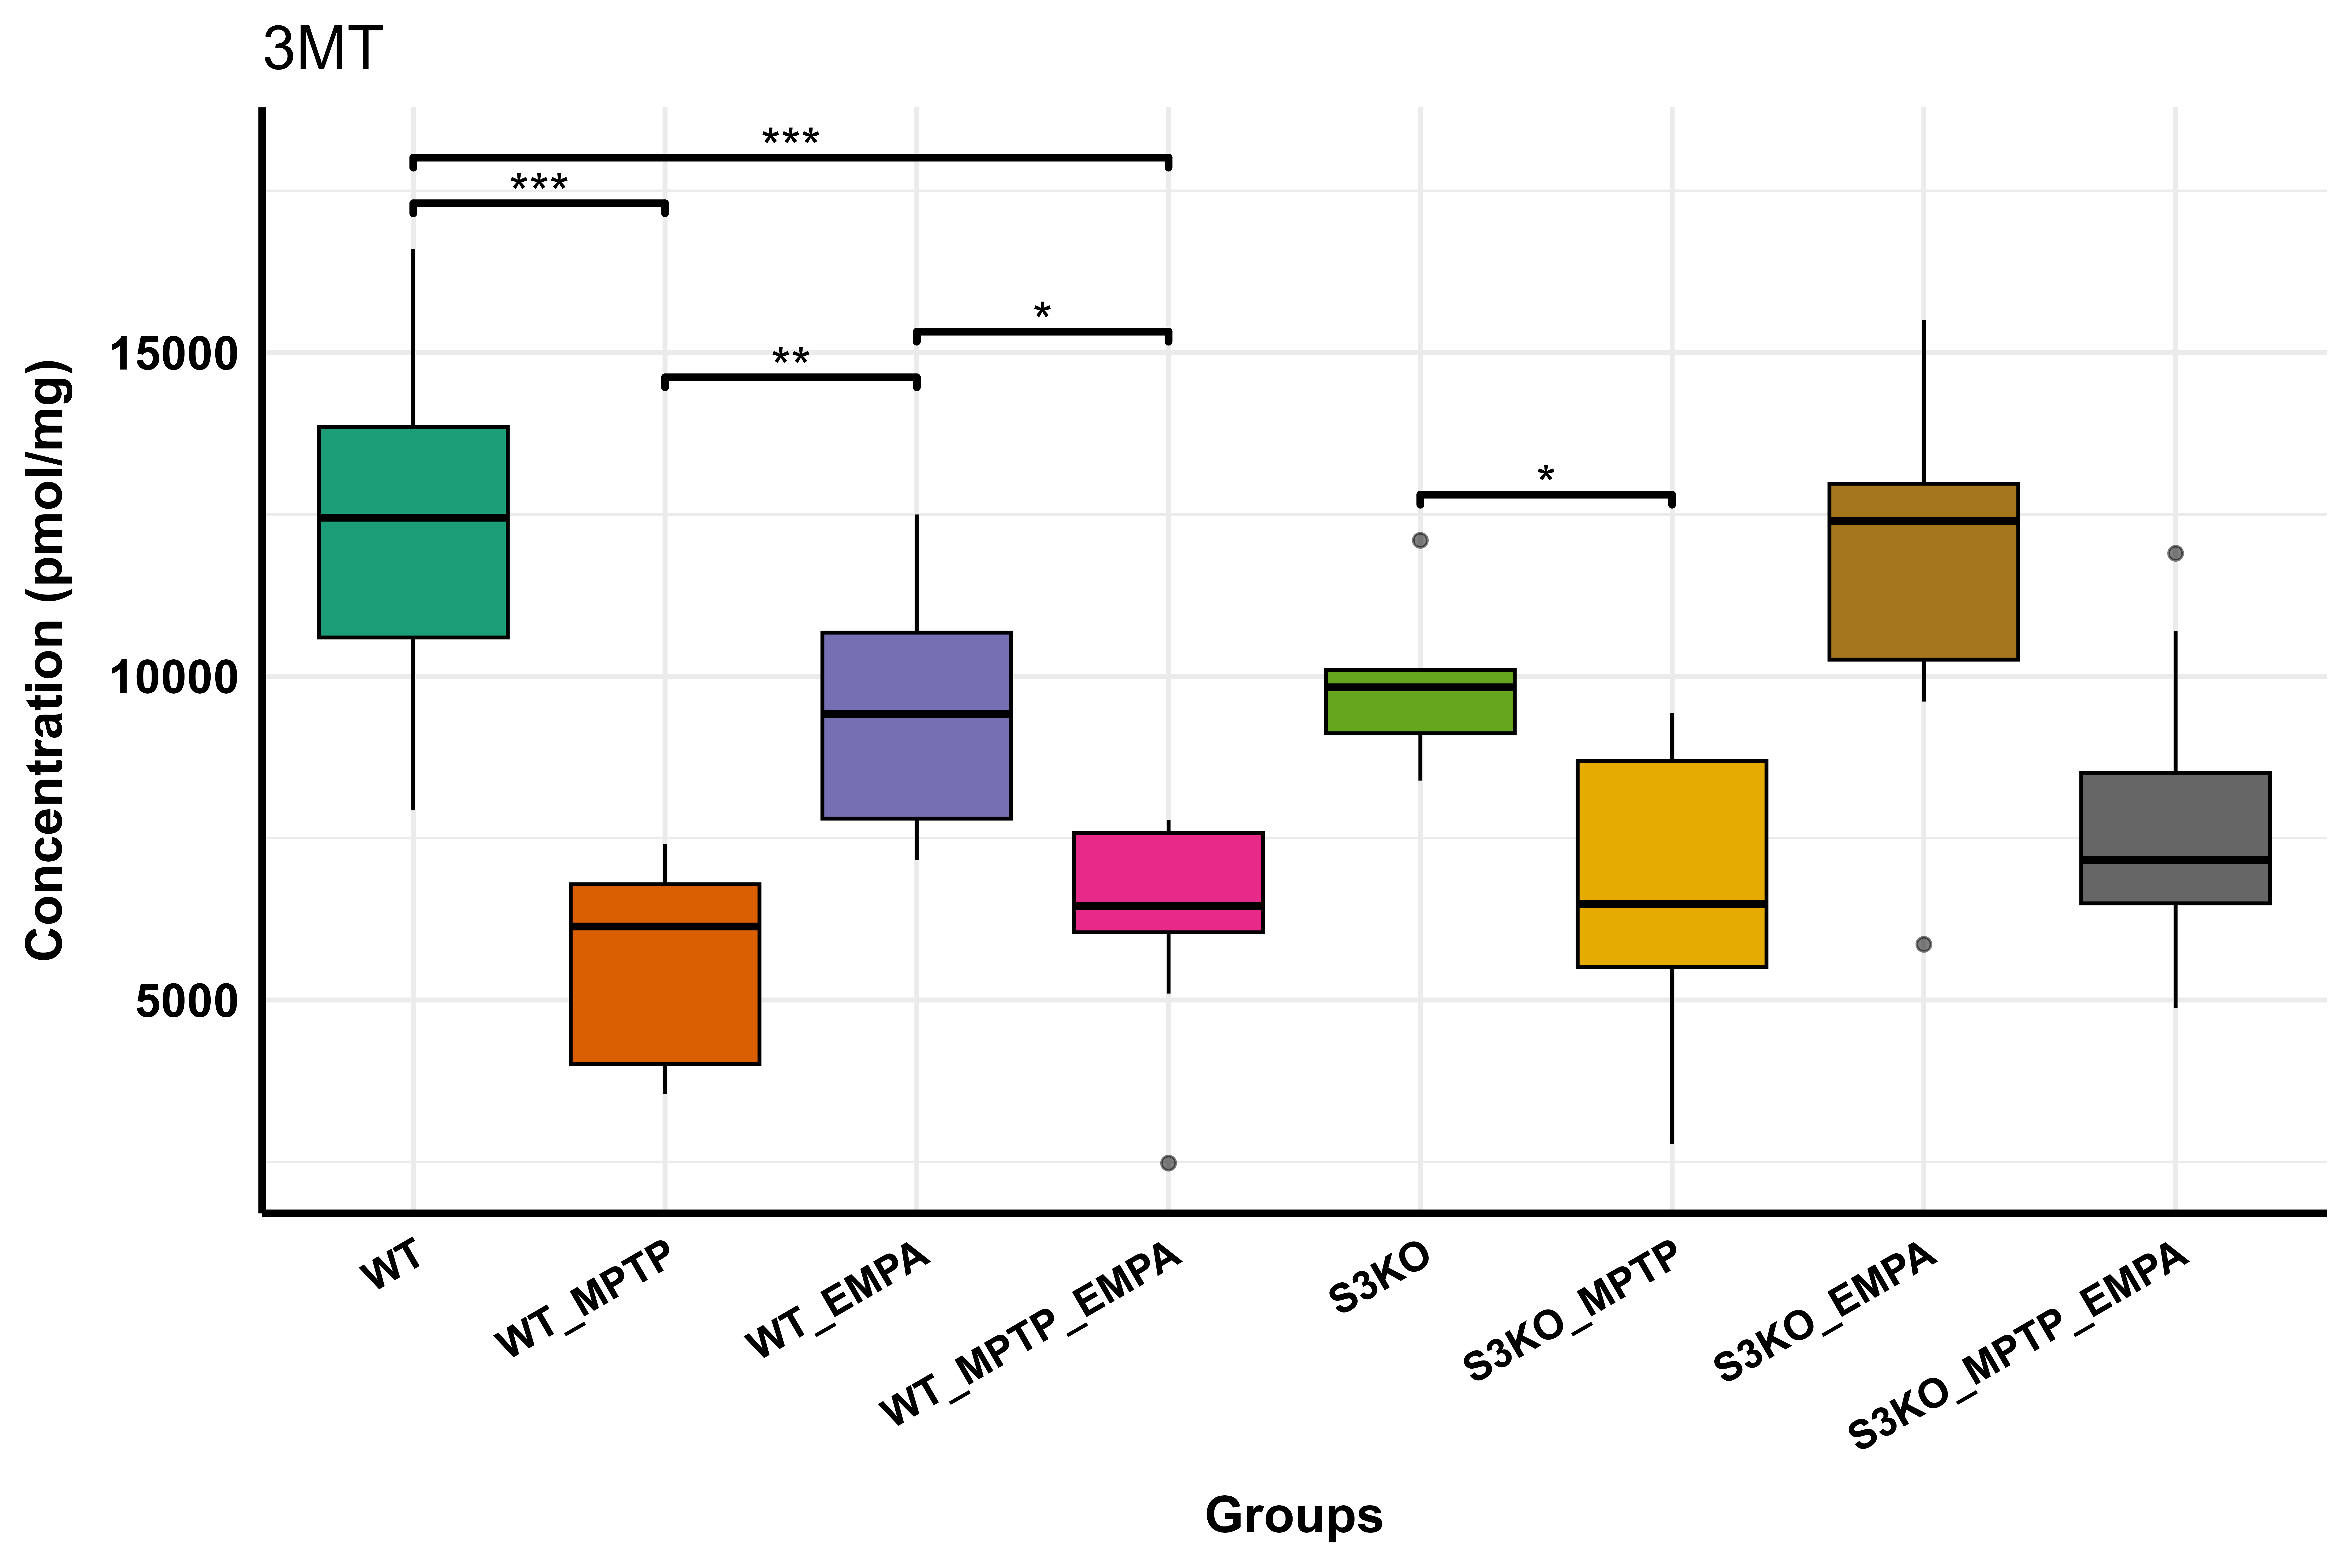


Boxplots of the comparison in 3MT levels between the 8 group.


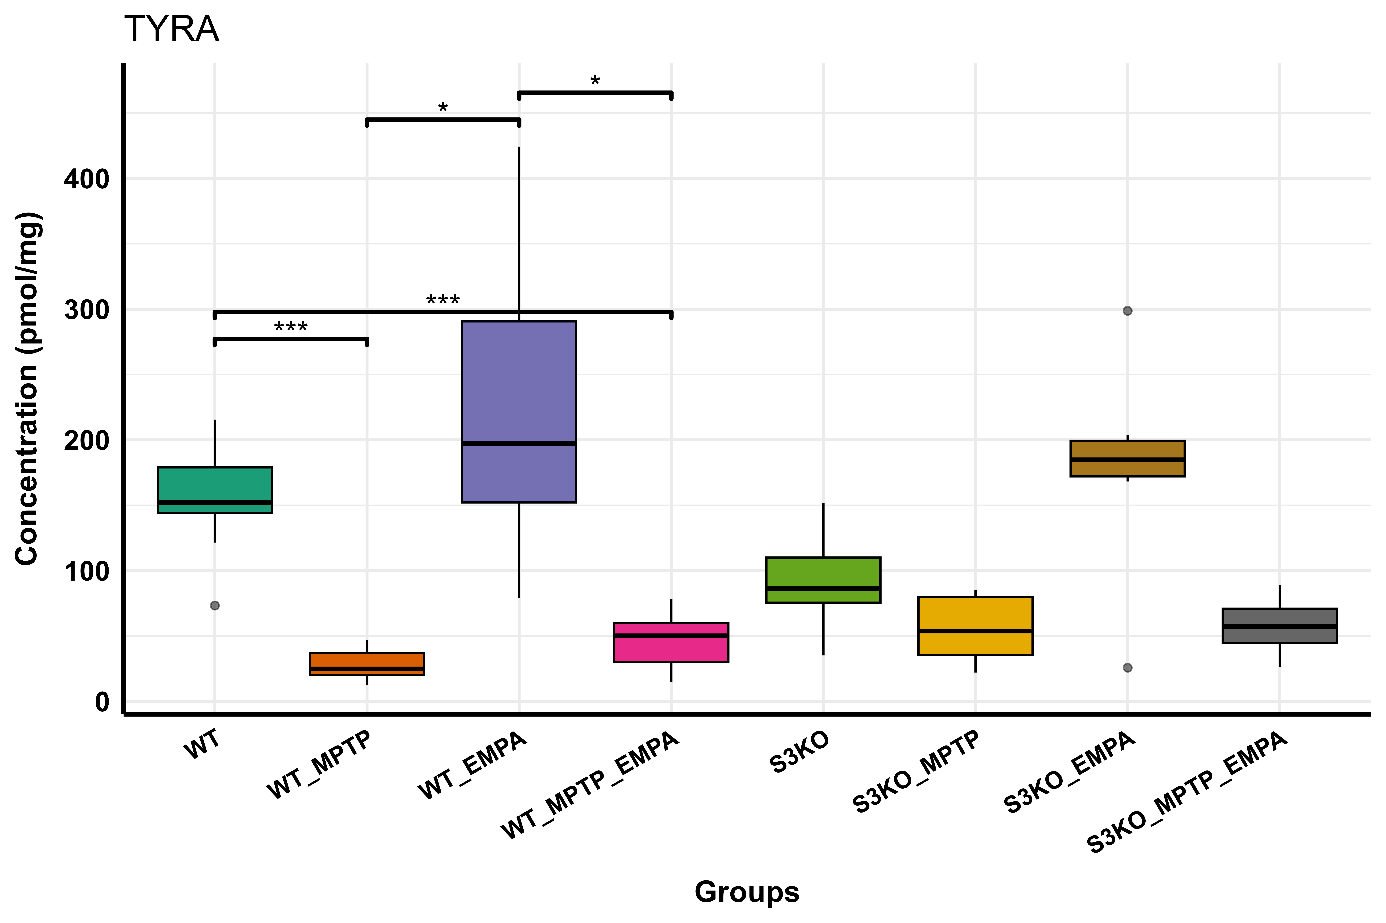


Boxplots of the comparison in TYRA levels between the 8 group.


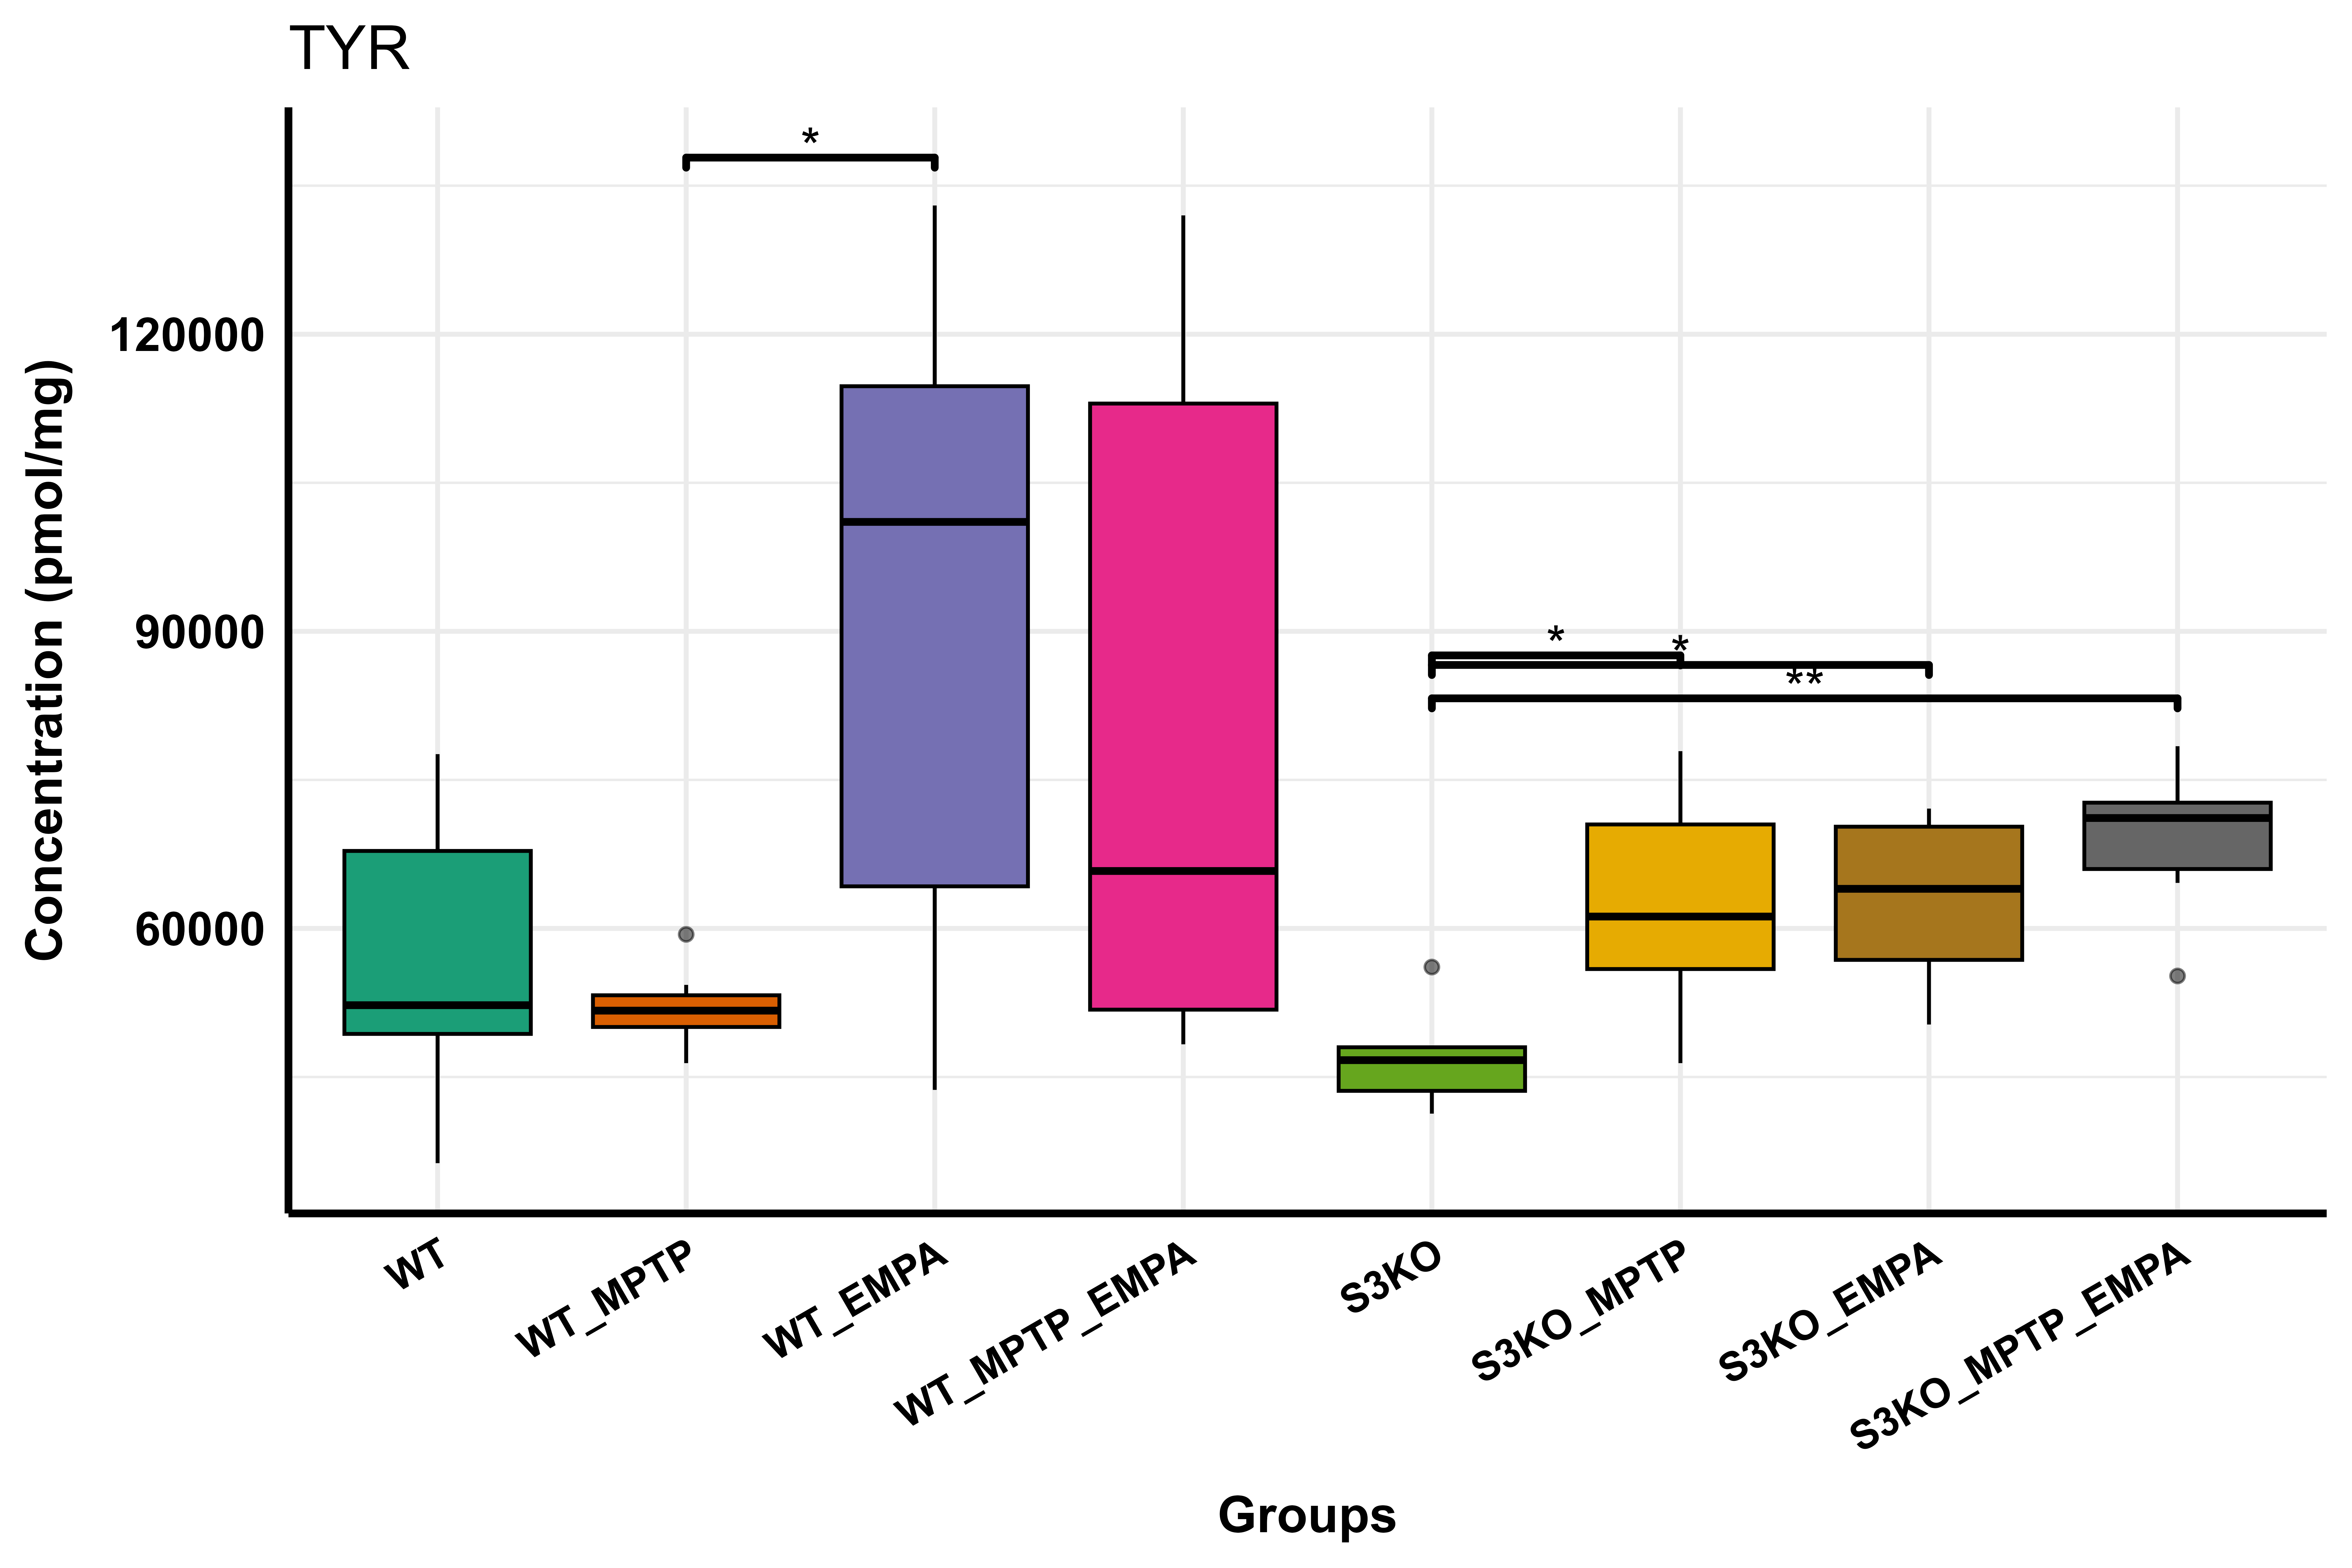


Boxplots of the comparison in TYR levels between the 8 group.
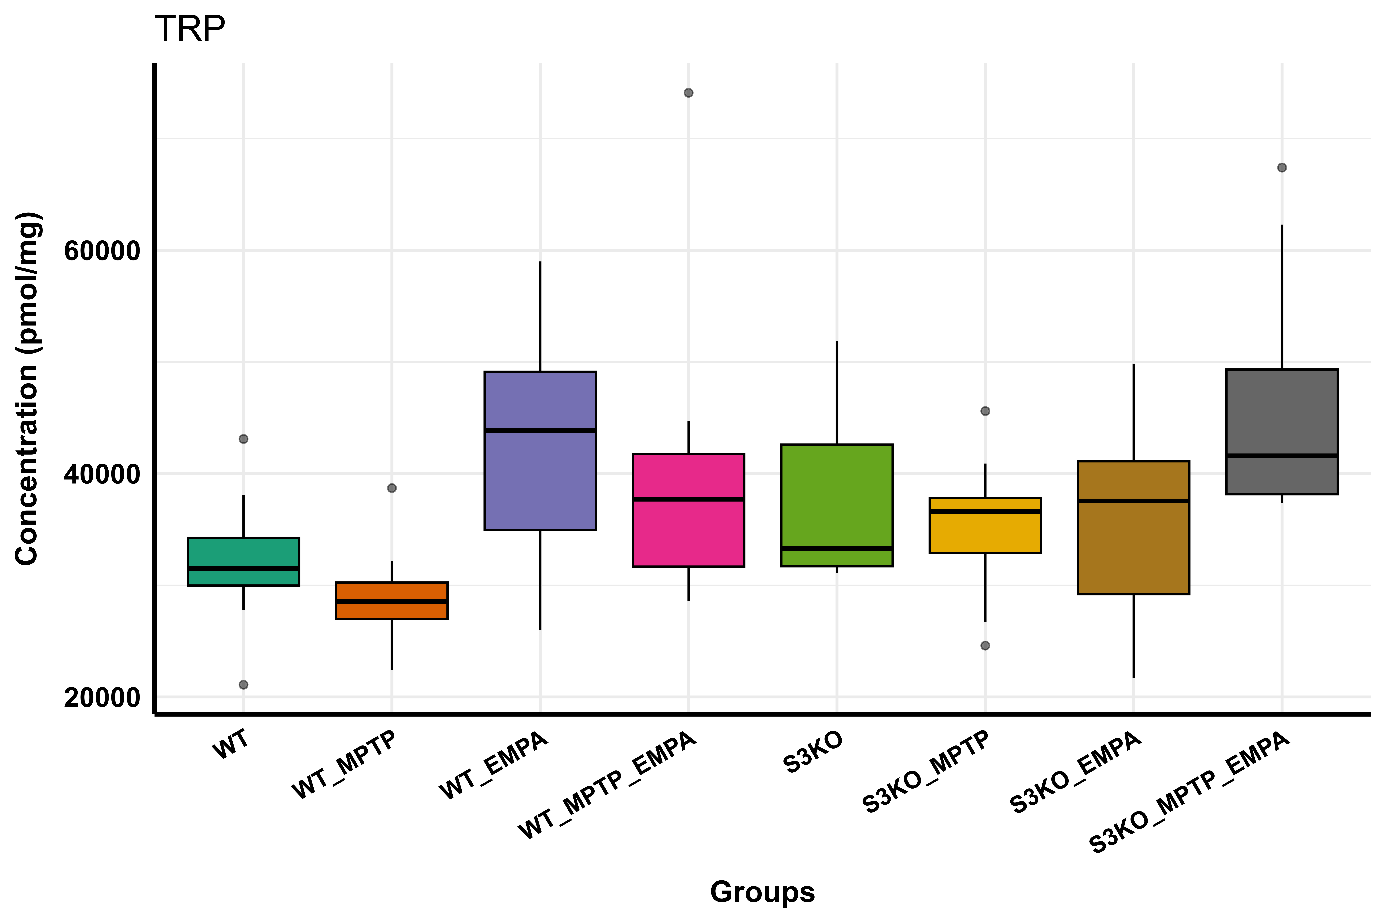


Boxplots of the comparison in TRP levels between the 8 group.


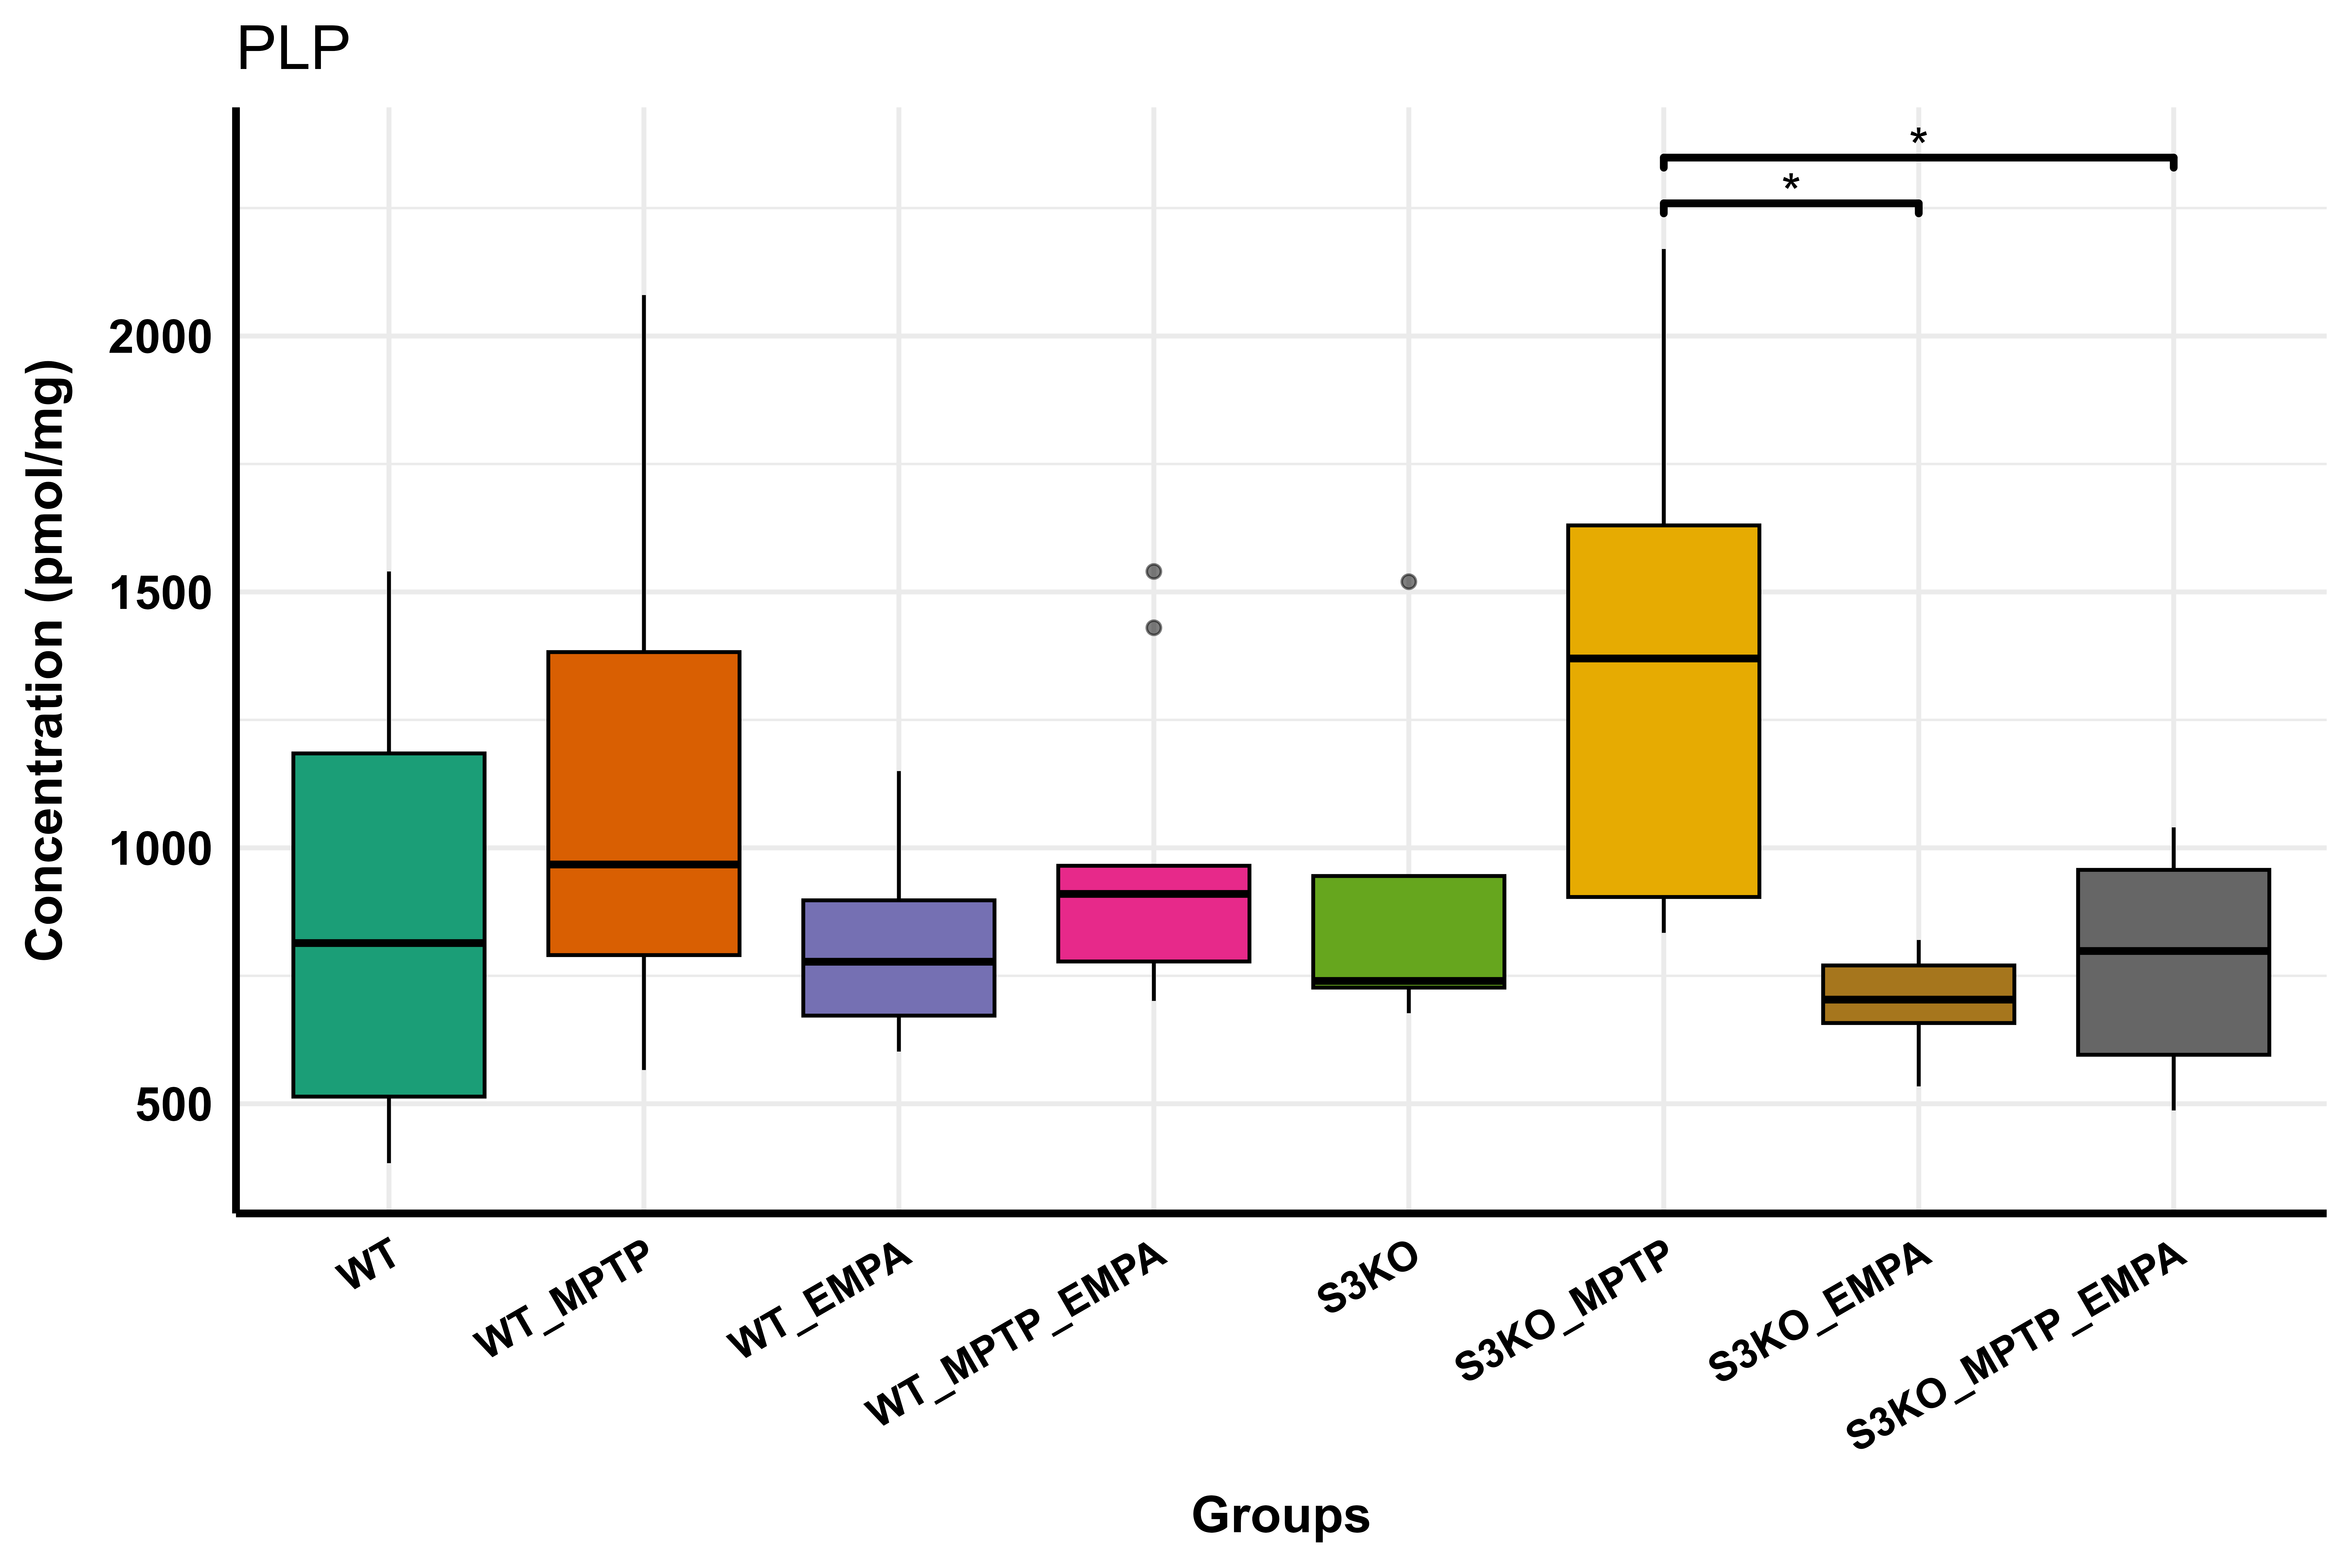


Boxplots of the comparison in PLP levels between the 8 group.
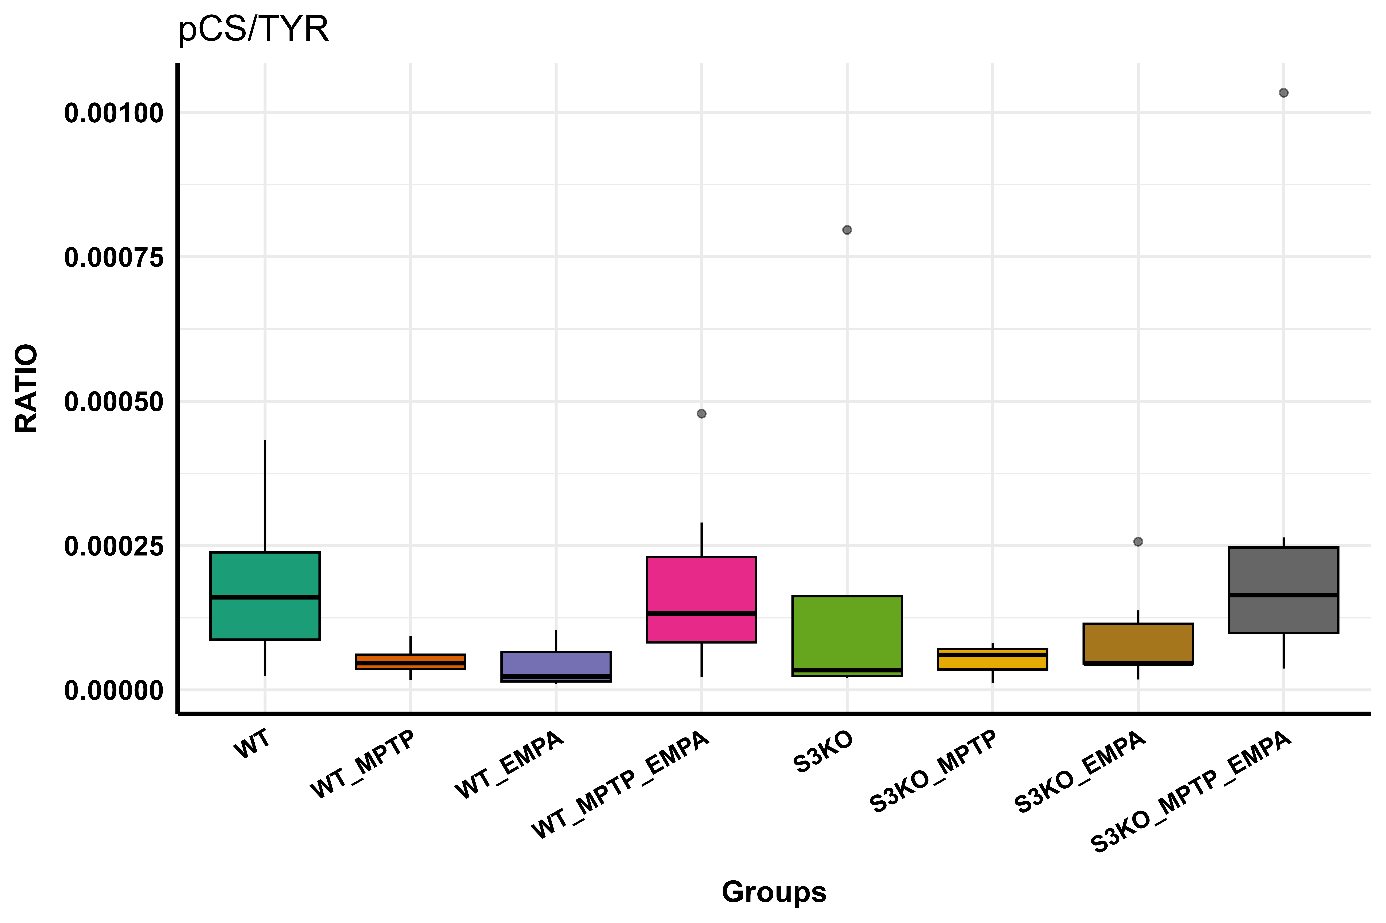


Boxplots of the comparison in pCS/TYR levels between the 8 group.


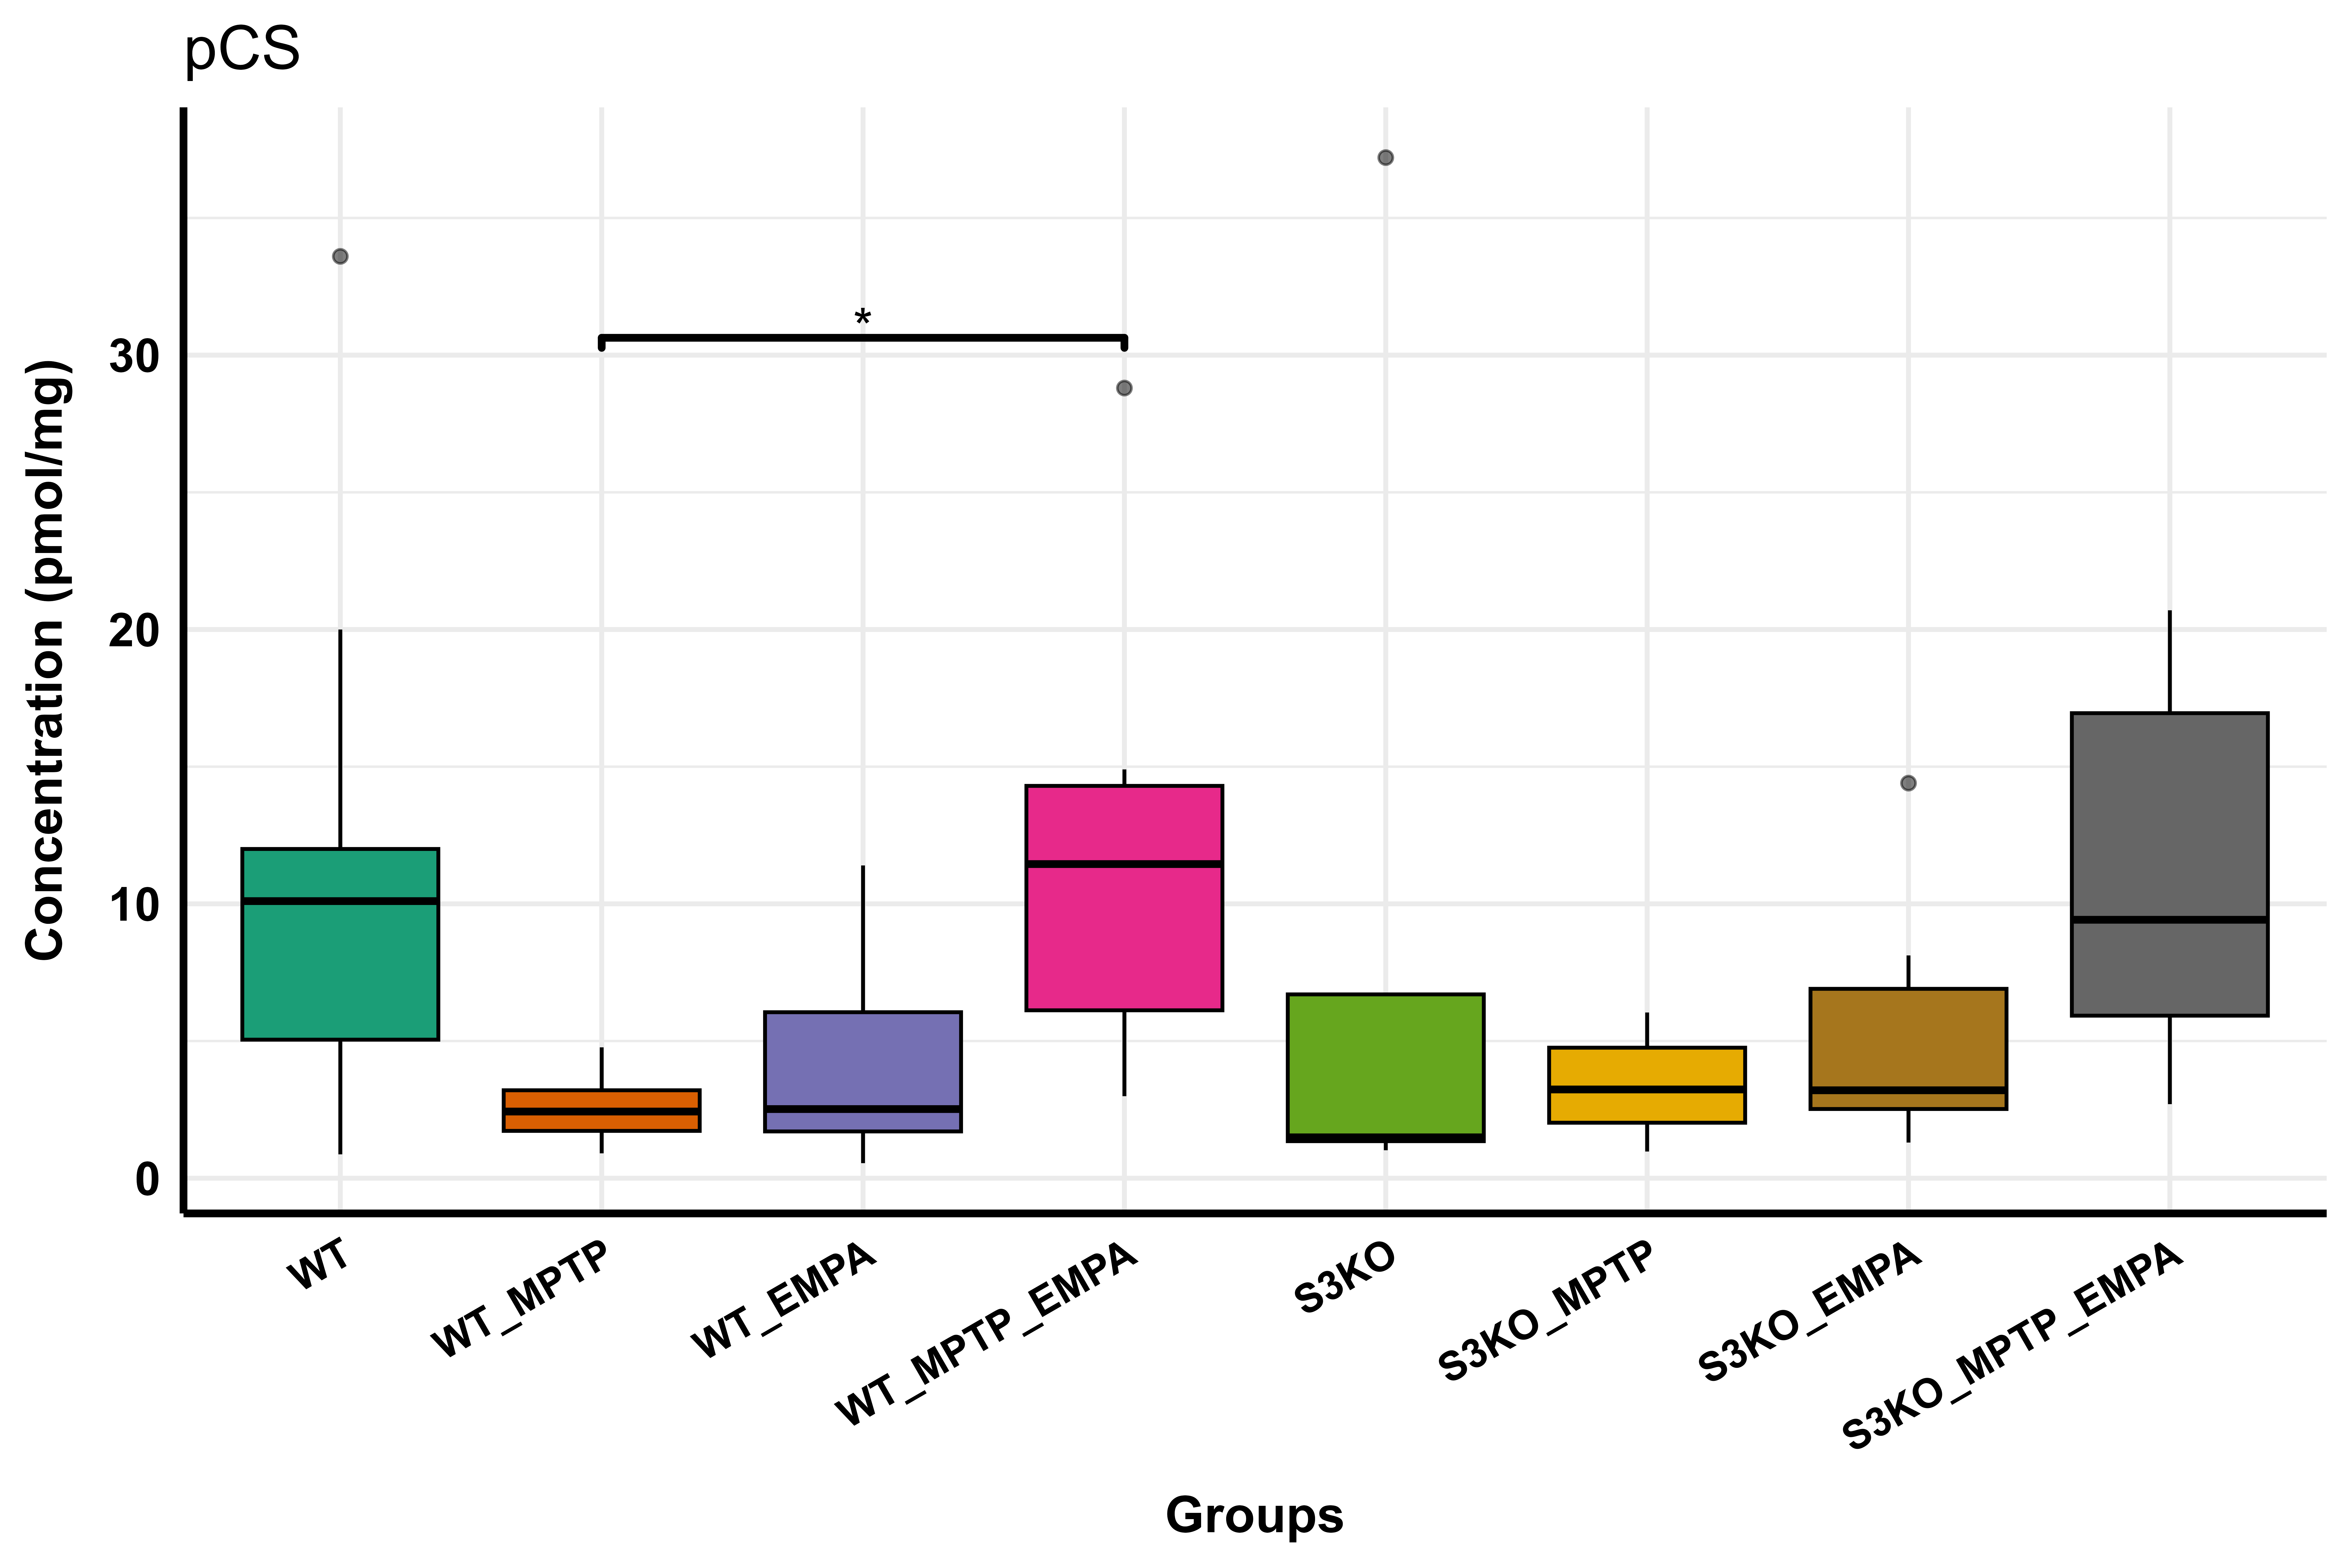


Boxplots of the comparison in pCS levels between the 8 group.
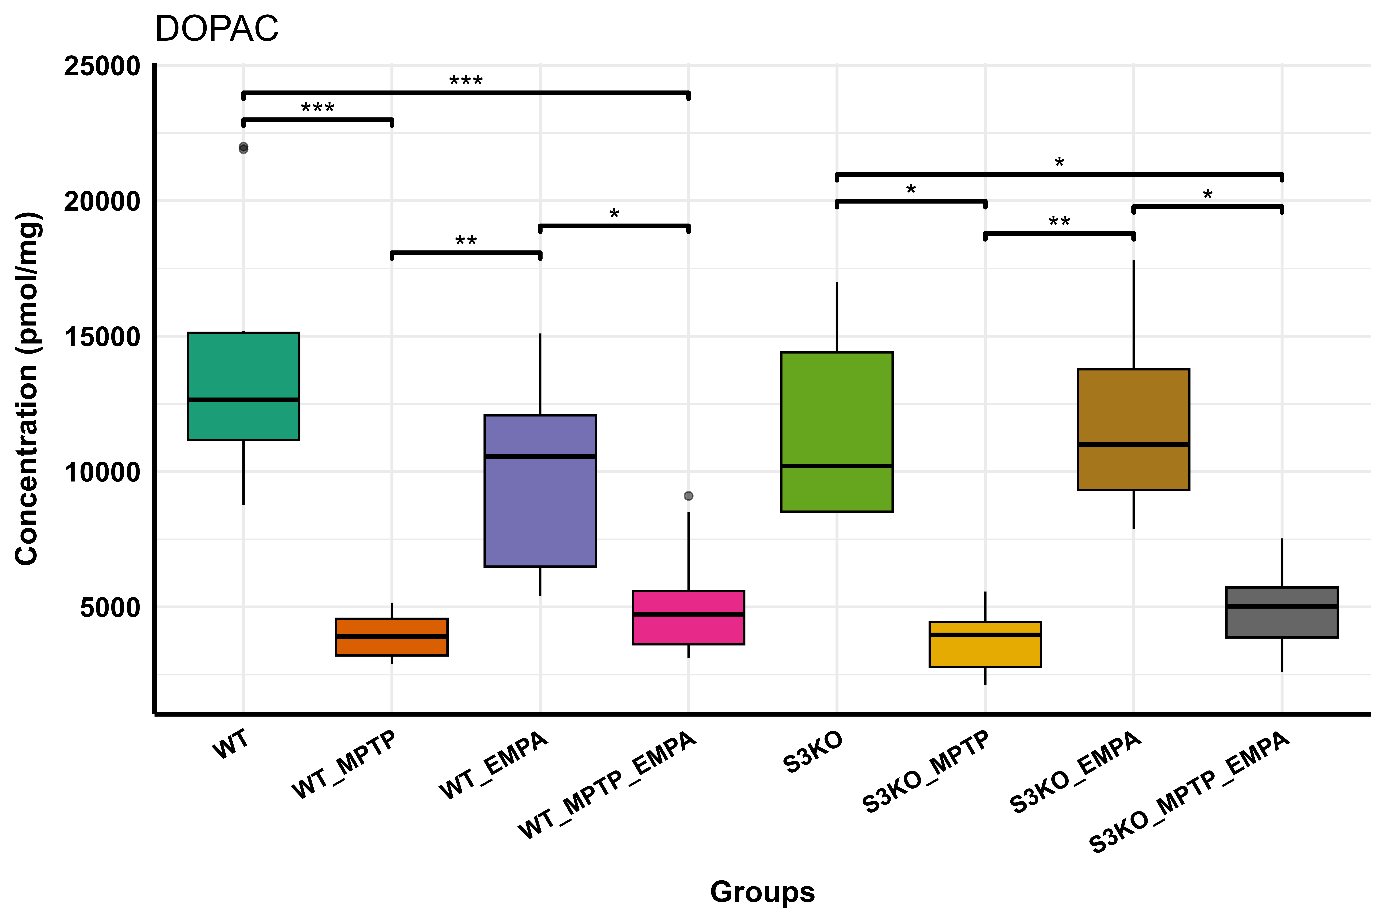


Boxplots of the comparison in DOPAC levels between the 8 group.
